# Supplementary material
Source: Royal Society of Chemistry journal article supplement (doi:10.1039/d6ew00063k)
Supplement: d6ew00063k1.xlsx [file d6ew00063k1.xlsx]

## Sheet: SCOPUS,IWA
LITERATURE SOURCE: Scopus and IWA without duplicates
KEYWORDS: ‘resilien*’ and ‘drinking water’ OR ‘water supply’ and ‘safety’ OR ‘security’ and ‘tool’ OR ‘plan’ OR ‘framework’ OR ‘approach’ and ‘developing countr*’ OR ‘low income countr*’
Authors	Title	Year
David, I.; Schatz, E.; Myroniuk, T.	“With Ebola, it was Important to Keep Away from Sick Individuals and with COVID, it’s Similar”: How Ebola Shaped the Health Worker Experience of COVID-19 in Sierra Leone	2024
Carrard, N.; Kumar, A.; Đinh Văn, Đ.; Kohlitz, J.; Retamal, M.; Taron, A.; Neemia, N.; Willetts, J.	8Rs for circular water and sanitation systems: Leveraging circular economy thinking for safe, resilient and inclusive services	2024
Ogunniran, O.P.; Ayeni, K.I.; Shokunbi, O.S.; Krska, R.; Ezekiel, C.N.	A 10-year (2014–2023) review of complementary food development in sub-Saharan Africa and the impact on child health	2024
Wang, J.; Qiao, Z.	A comprehensive review of landfill leachate treatment technologies	2024
Anyango, G.W.; Bhowmick, G.D.; Sahoo Bhattacharya, N.	A critical review of irrigation water quality index and water quality management practices in micro-irrigation for efficient policy making	2024
Gupta, J.; Bai, X.; Liverman, D.M.; Rockström, J.; Qin, D.; Stewart-Koster, B.; Rocha, J.C.; Jacobson, L.; Abrams, J.F.; Andersen, L.S.; Armstrong McKay, D.I.; Bala, G.; Bunn, S.E.; Ciobanu, D.; DeClerck, F.; Ebi, K.L.; Gifford, L.; Gordon, C.; Hasan, S.; Kanie, N.; Lenton, T.M.; Loriani, S.; Mohamed, A.; Nakicenovic, N.; Obura, D.; Ospina, D.; Prodani, K.; Rammelt, C.; Sakschewski, B.; Scholtens…	A just world on a safe planet: a Lancet Planetary Health–Earth Commission report on Earth-system boundaries, translations, and transformations	2024
Powers, M.	A livable planet: Human rights in the global economy	2024
Soo, A.; Shon, H.K.	A nutrient circular economy framework for wastewater treatment plants	2024
Jurczynski, Y.; Passos, R.; Campos, L.C.	A Review of the Most Concerning Chemical Contaminants in Drinking Water for Human Health	2024
Manish Sharma, Bansari Sharma, Nand Kumar, Ashwani Kumar	A framework to assess urban water resilience in developing countries like India: Looking beyond water utilities and networked cities	2024
Shayamunda, R.H.	Access to basic water and sanitation infrastructure among women in African informal settlements: Implications for health	2024
Hassan, A.W.; Zhang, D.; Ibrahim, M.	Accessibility to WASH and waste management services in African urban informal settlements: A comparative analysis	2024
Luis, C.; Aubert, M.; Parrot, L.	Achieving healthy and profitable production through collective action? The case of vegetable farmers in the French West Indies	2024
Barkat, K.; Mimouni, K.; Alsamara, M.; Mrabet, Z.	Achieving the sustainable development goals in developing countries: The role of remittances and the mediating effect of financial inclusion	2024
Nchofoung, T.N.; Nkemgha, G.Z.; Fokam, D.N.D.T.; Njamen Kengdo, A.A.N.	Achieving the Sustainable Development Goals Through Water and Sanitation: Do Information and Communication Technologies (ICTs) Matter for Africa?	2024
Ure, J.	Achieving the United Nations Sustainable Development Goals: Late or Too Late?	2024
Lebu, S.; Lee, A.; Salzberg, A.; Bauza, V.	Adaptive strategies to enhance water security and resilience in low- and middle-income countries: A critical review	2024
Cook, M.A.; Tremaine, D.M.; Wyatt, B.M.; Banner, J.L.; Charles, J.; Berg, M.; Bruno, T.; Glazer, Y.R.; Callison, C.; Mace, R.E.; Miller, V.; Bare, R.; Flores, R.S.; Seefeldt, J.; Fuller, A.; Niyogi, D.	Addressing Challenges to Ensuring Justice and Sustainability in Policy and Infrastructure for Texas Water Resources in the 21st Century	2024
Vohra, R.; Kumar, A.	Advanced geospatial practices in natural environment resource management	2024
Crosson, C.; Pincetl, S.; Scruggs, C.; Gupta, N.; Bhushan, R.; Sharvelle, S.; Porse, E.; Achilli, A.; Zuniga-Teran, A.; Pierce, G.; Boccelli, D.L.; Gerba, C.P.; Morgan, M.; Cath, T.Y.; Thomson, B.; Baule, S.; Glass, S.; Gold, M.; MacAdam, J.; Cole, L.; Mier, M.; Shipek, C.; Meixner, T.	Advancing a Net Zero Urban Water Future in the United States Southwest: Governance and Policy Challenges and Future Needs	2024
LienLe, T.H.; Dang, K.K.; Moss, J.; Nguyen, H.Q.; Kristiansen, P.	Agricultural transformation in the Vietnamese Mekong Delta in the new era	2024
Cid-Escobar, D.; Folch, A.; Ferrer, N.; Katuva, J.; Sánchez-Vila, X.	An assessment tool to improve rural groundwater access: Integrating hydrogeological modelling with socio-technical factors	2024
Camargo-Bertel, A.A.; Lizarazo, C.; Corredor, L.; Campillo, J.; Gonzalez-Quiroga, A.; Pupo-Roncallo, O.	Analyzing trends in energy modeling tools in Latin America: A comprehensive review	2024
Nasiri Khiavi, A.; Vafakhah, M.; Sadeghi, S.H.	Application of strategic planning and multi-objective decision-making models in integrated watershed management: A case study in the Cheshmeh-Kileh Watershed, Iran	2024
Mao, C.; Yue, A.; Wang, Z.; Zhao, S.; Su, Y.; Zeng, S.	Are cities genuinely healthy? Diagnosis of urban development from the perspective of adaptive capacity	2024
Kamran; Khayyam, U.; Safdar, F.; Wahdatyar, R.; Waheed, A.; Khokhar, M.F.	Assessing the impact of socio-demographic factors on municipal water security in planned and unplanned urban centers of Pakistan	2024
Aldegheishem, A.	Assessing urban sustainability in Saudi Arabia: an empirical evidence from Al-Medina Al-Munawwarah	2024
Zhalmurziyeva, K.; Tokbolat, S.; Durdyev, S.; Mustafa, M.Y.; Karaca, F.	Assessment of sustainability indicators for urban water infrastructure in a developing country	2024
Gürsu, H.	Assessment of Theoretical and Test Performance Considerations of Concentrated Solar Water Purification System “Parabosol” in Underserved Regions	2024
Tabassum, S.; Dristy, J.T.; Ahmed, A.; Riyad, R.H.	Assessment of tube well water quality in selected residential areas in Khulna	2024
Nathalie Verbrugghe, Ahmed Z. Khan	Atmospheric water harvesting as a sustainable and resilient resource in arid climates: gaining insights from ancient techniques	2024
Alfonso Molina, C.; Quiroz-Moreno, C.; Pablo Jarrín, V.; Díaz, M.; Yugsi, E.; Pérez-Galarza, J.; Baldeón-Rojas, L.	Bacterial community assessment of drinking water and downstream distribution systems in highland localities of Ecuador	2024
Hlongwa, N.; Nkomo, S.L.; Desai, S.A.	Barriers to water, sanitation, and hygiene in Sub-Saharan Africa: a mini review	2024
Esha, A.A.	Beyond drinking water supply infrastructure: gendered lived experiences in coastal Bangladesh	2024
Heidler, A.	Beyond technological flexibility: Unpacking citywide inclusive sanitation through the territorial political economy framework	2024
García, I.	Beyond Urban-Centered Responses: Overcoming Challenges to Build Disaster Resilience and Long-Term Sustainability in Rural Areas	2024
Dahunsi, O.S.	Biorefinery: A Sustainable Waste Management Solution for the Developing World	2024
Palkovich, A.M.	Bodies, Ontology, and Bioarchaeology: Articulating 14th Century Life at Arroyo Hondo Pueblo	2024
Mengstie, B.M.	Business landscape and growth determinants of micro- and small enterprises working in WASH sector: evidence from Ethiopia	2024
Jena, P.R.; Khosla, S.; Rahut, D.B.	Can farmers with higher capabilities fend off falling into future Poverty? Empirical evidence from a tribal region in eastern India	2024
Vitale, M.P.	Career pathways and professional identities for front-line workers in the service industries	2024
Gregory, A.; Kelly, E.; Landa, S.; Muthike, D.M.; Samo, J.; Lopez, J.; Burrows, G.; McManus, C.; Sobsey, M.D.; Salzberg, A.; Cronk, R.	Challenges and opportunities for enhancing groundwater data access and usability in low-and middle-income countries: insights and recommendations from WaSH researchers and practitioners	2024
Schneeman, B.O.; Anupindi, R.M.; Cuff, P.	Challenges in supply, market competition, and regulation of infant formula in the United States	2024
Sonia Salas-Bravo, Angelo Araya-Piñones	Climate change and adaptive capacity in the community of Diaguitas, Chile: A descriptive-comparative vision in two time periods	2024
Lindvall, D.	Climate Change and the Endurance of Democracy	2024
Bose, I.; Dreibelbis, R.; Green, R.; Murray, K.A.; Ceesay, O.; Kovats, S.	Climate change, seasonality and household water security in rural Gambia: A qualitative exploration of the complex relationship between weather and water	2024
Nawaz, T.; Fahad, S.; Nawaz, T.; Saud, S.; Ur Rahman, T.; Adnan, M.; Khan, M.N.R.; Khan, I.; Hussain, Q.; Hassan, S.	Climate change−resilient crop production	2024
Madani-Hosseini, M.; Zargoush, M.; Ghazalbash, S.	Climate crisis risks to elderly health: strategies for effective promotion and response	2024
Iyer, R.; Kohlitz, J.	Climate impacts on rural sanitation: evidence from Burkina Faso, Bangladesh and Lao PDR	2024
Geremew, A.; Nijhawan, A.; Mengistie, B.; Mekbib, D.; Flint, A.; Howard, G.	Climate resilience of small-town water utilities in Eastern Ethiopia	2024
Agarwal, V.; Kumar, M.	Comparative analysis of water management policies, guidelines, and regulations in Indian Subcontinent Rivers: A contrast between the developed and developing world	2024
Beker, B.A.; Kansal, M.L.	Complexities of the urban drinking water systems in Ethiopia and possible interventions for sustainability	2024
	Constructing Valid Geospatial Tools for Environmental Justice	2024
Khan, A.; Murad, W.; Salahuddin; Ali, S.; Shah, S.S.; Halim, S.A.; Khalid, A.; Kashtoh, H.; Khan, A.; Al-Harrasi, A.	Contribution of mushroom farming to mitigating food scarcity: Current status, challenges and potential future prospects in Pakistan	2024
Siphambe, T.V.; Ahana, B.S.; Aliyu, A.; Tiwangye, A.; Fomena-Tchinda, H.; Tchouandem-Nzali, C.; Mwamila, T.B.; Nya, E.L.; Chérifa, C.; Gwenzi, W.; Noubactep, C.	Controlling stormwater at the source: dawn of a new era in integrated water resources management	2024
Garcia, E.D.S.; Quaresma, N.; Aemro, Y.B.; Coimbra, A.P.; de Almeida, A.T.	Cooling with the sun: Empowering off-grid communities in developing countries with solar-powered cold storage systems	2024
Vijayaraghavan, A.P.; Chattaraj, D.	Critical food studies in Asia: A machine-generated literature overview	2024
Evangelista, S.S.; Maturan, F.; Wenceslao, C.; May Atibing, N.; Villarosa, R.; Ocampo, L.	Cumulative prospect theory under different types of input data for public health resilience assessment during natural disasters	2024
Ajibesin, A.A.; Vajjhala, N.R.	Data envelopment analysis (DEA) methods for maximizing efficiency	2024
Farzana, S.Z.; Paudyal, D.R.; Chadalavada, S.; Alam, M.J.	Decision Support Framework for Water Quality Management in Reservoirs Integrating Artificial Intelligence and Statistical Approaches	2024
Cunningham, I.; Kohlitz, J.; Willetts, J.	Designing for climate change: twenty-five design features to improve sanitation technology resilience in low- and middle- income countries	2024
Ibrahim, E.A.	Determinants and performances of food security in the Middle East and North Africa region countries	2024
Abbas, A.; Hameed, R.; Khattak, W.A.; Shahani, A.A.A.; Balooch, S.; Zulfiqar, U.; Huang, P.; Du, D.	Disaster management and its impact on sustainable agriculture	2024
Thomas-Possee, M.L.H.; Shaw, P.J.; Bain, R.E.S.; Hill, A.G.; Okotto-Okotto, J.; Okotto, L.G.; Dzodzomenyo, M.; Wright, J.A.	Disposable diaper consumption in sub-Saharan Africa: Estimating the risks of associated unsafe waste	2024
Dzawanda, B.; Matsa, M.M.; Chireshe, A.	Do Children Matter in the Quest for Sustainable Development Goals Attainment? Children’s Vulnerability and Water Scarcity in Zimbabwe	2024
Nyemba, W.R.; Carter, K.F.	Doctoral Training in Engineering: Developing Indigenous Capacities and Skills for Economic Growth in Industrialising Countries	2024
Njangang, H.; Simplice, S.A.; Mouchili, E.	Does corruption starve Africa? The mitigating effect of political distribution of power	2024
de Almeida Barbosa Franco, J.; Franco Junior, A.; Battistelle, R.A.G.; Bezerra, B.S.	Dynamic Capabilities: Unveiling Key Resources for Environmental Sustainability and Economic Sustainability, and Corporate Social Responsibility towards Sustainable Development Goals	2024
Buser, M.	ECOLOGIES OF CARE IN TIMES OF CLIMATE CHANGE: Water Security in the Global Context	2024
Kolawole, I.D.; Kolawole, G.O.; Sanni-Manuel, B.A.; Kolawole, S.K.; Ewansiha, J.U.; Kolawole, V.A.; Kolawole, F.O.	Economic impact of waste from food, water, and agriculture in Nigeria: challenges, implications, and applications—a review	2024
Sharma, M.; Lakhan, R.	Effective Approaches to Global Health Issues	2024
Moti Poudel, Subodh Sharma, Anish Ghimire, Guy Howard, Adrian Flint	Effectiveness of climate resilient water safety plans in Nepal	2024
Asaki, F.A.; Oteng-Abayie, E.F.; Baajike, F.B.	Effects of water, energy, and food security on household well-being	2024
Fan, Y.; Döring, T.; Li, S.; Zhang, X.; Fang, M.; Yu, Y.	Energy poverty and public health vulnerability: A multi-country analysis	2024
Dayoub, M.; Shnaigat, S.; Tarawneh, R.A.; Al-Yacoub, A.N.; Al-Barakeh, F.; al-Najjar, K.	Enhancing Animal Production through Smart Agriculture: Possibilities, Hurdles, Resolutions, and Advantages	2024
Kundu, B.; Rana, N.K.; Kundu, S.	Enhancing drought resilience: machine learning–based vulnerability assessment in Uttar Pradesh, India	2024
Chinara Adamkulova, Zhorobai Aitbaev	Ensuring climate resilience in Central Asia through the establishment of a water management education program	2024
Goodwin, N.; Harris, J.M.; Rajkarnikar, P.J.; Roach, B.; Thornton, T.B.	Essentials of economics in context: Second edition	2024
Huynh, T.T.N.; Hofstra, N.; Nguyen, H.Q.; Baker, S.; Pathirana, A.; Corzo-Pérez, G.A.; Zevenbergen, C.	Estimating disease burden of rotavirus in floodwater through traffic in the urban areas: A case study of Can Tho city, Vietnam	2024
Gonzalez, D.; Guillaume, J.; Peeters, L.; Wyrwoll, P.; Vanderzalm, J.; Page, D.	Estimating the costs of managed aquifer recharge under uncertainty with examples for town water supply in regional Australia	2024
Alting von Geusau, F.A.M.	European Perspectives on World Order	2024
Ezira Mbalibulha, Joseph Wasswa, Denis Obura	Evaluating extreme climatic indices in a mountainous region using satellite data: a framework to advance climate resilience and sustainable development	2024
Lin, C.; Chen, R.; Wang, B.; Li, X.	Evaluating resilience and enhancing strategies for old urban communities amidst epidemic challenges	2024
Romero-Gomez, G.; Nadal-Tersa, J.; Saurí, D.	Experiences of water poverty in the metropolitan area of Barcelona: implications for the Global North	2024
Araújo, B.M.; Gold, D.F.; Lau, L.B.; Reed, P.M.; Alves, C.M.A.	Exploring Equity Challenges within Deeply Uncertain Water Supply Investment Pathways in the Federal District of Brazil	2024
	Exploring linkages between soil health and human health	2024
Obong'O, B.O.; Ogutu, F.O.; Hurley, S.K.; Okiko, G.M.; Mahony, J.	Exploring the Microbial Ecology of Water in Sub-Saharan Africa and the Potential of Bacteriophages in Water Quality Monitoring and Treatment to Improve Its Safety	2024
Miller, M.; Appling, C.; Ellis, N.; Bartram, J.	External Support for Solar-Powered Water Pumping Systems in Rural Areas: A Systematic Review	2024
Kádár, J.; Abdelshakour, O.; Zohar, T.; Abu-Hamed, T.A.	Feasibility Assessment of a Small-Scale Agrivoltaics-Based Desalination Plant with Flywheel Energy Storage—Case Study: Namibia	2024
Jebari, A.; Pereyra-Goday, F.; Kumar, A.; Collins, A.L.; Jordana Rivero, M.J.; McAuliffe, G.A.	Feasibility of mitigation measures for agricultural greenhouse gas emissions in the UK. A systematic review	2024
Weindl, I.; Soergel, B.; Ambrosio, G.; Daioglou, V.; Doelman, J.; Beier, F.; Beusen, A.; Bodirsky, B.L.; Bos, A.; Dietrich, J.P.; Humpenöder, F.; von Jeetze, P.; Karstens, K.; Rauner, S.; Stehfest, E.; Stevanović, M.; van Zeist, W.-J.; Lotze-Campen, H.; Van Vuuren, D.; Kriegler, E.; Popp, A.	Food and land system transformations under different societal perspectives on sustainable development	2024
Vargas, S.J.R.; Sipes, P.; Tortosa-la Osa, S.; Ebner, P.	Food safety in the Dominican Republic—The current situation and challenges in the public management system	2024
Cavanaugh, A.C.; Bixby, H.R.; Mangwani, S.; Agyei-Mensah, S.; Awuni, C.A.; Baumgartner, J.C.; Owusu, G.; Robinson, B.E.	From consumption to context: assessing poverty and inequality across diverse socio-ecological systems in Ghana	2024
Selamat, M.H.; Tamam, A.H.; Soon, F.K.	From Risk to Resilience: Analyzing Key Success Factors in Malaysian Water Risk Management	2024
Grewal, A.S.; Dhingra, A.K.; Nepali, K.; Deswal, G.; Srivastav, A.L.	Frontiers in combating antibacterial resistance: Current perspectives and future Horizons	2024
Vallero, D.A.	Fundamentals of Water Pollution: Quantifying Pollutant Formation, Transport, Transformation, Fate, and Risks	2024
Blanford, J.	Geographic Information, Geospatial Technologies and Spatial Data Science for Health	2024
Rahut, D.B.; Mishra, R.; Bera, S.	Geospatial and environmental determinants of stunting, wasting, and underweight: Empirical evidence from rural South and Southeast Asia	2024
Duku, G.A.; Appiah-Effah, E.; Gyamfi, C.; Nyarko, K.B.	Ghana’s water safety journey: A review of efforts toward a risked-based water quality management	2024
Raphael, C.; Matsuoka, M.	Ground Truths: Community-Engaged Research for Environmental Justice	2024
Ayeta, E.G.; Yafetto, L.; Lutterodt, G.; Ogbonna, J.F.; Miyittah, M.K.	Groundwater in the coastal areas of Ghana: Quality and associated health risks	2024
Jorgensen, L.F.; Troldborg, L.; Ondracek, M.; Seidenfaden, I.K.; Kidmose, J.; Vangsgaard, C.; Hinsby, K.	Groundwater resilience, security, and safety in the four largest cities in Denmark; Resilienza, sicurezza e protezione delle acquee sotterranee nelle quattro città più grandi della Danimarca	2024
Barnes, T.D.; Beaulieu, E.	Handbook on Gender and Corruption in Democracies	2024
Haque, M.A.; Deb Nath, N.D.; Johnston, T.V.; Haruna, S.; Ahn, J.; Ovissipour, R.; Ku, S.	Harnessing biotechnology for penicillin production: Opportunities and environmental considerations	2024
Toumi, S.; Lekmine, S.; Touzout, N.; Moussa, H.; Elboughdiri, N.; Boudraa, R.; Benslama, O.; Kebir, M.; Danish, S.; Zhang, J.; Amrane, A.; Tahraoui, H.	Harnessing Deep Learning for Real-Time Water Quality Assessment: A Sustainable Solution	2024
Ugwu, O.P.-C.; Alum, E.U.; Ugwu, J.N.; Eze, V.H.U.; Ugwu, C.N.; Ogenyi, F.C.; Okon, M.B.	Harnessing technology for infectious disease response in conflict zones: Challenges, innovations, and policy implications	2024
Gillies, A.	Healthcare Management: Global Perspectives	2024
Houngnikpo, M.C.	Historical Dictionary of Benin, Fifth Edition	2024
Fry, G.W.	Historical Dictionary of Thailand, Fourth Edition	2024
Armaline, W.T.; Glasberg, D.S.	Human Rights Praxis and the Struggle for Survival	2024
Monaco, S.	Identity, Territories, and Sustainability: Challenges and Opportunities for Achieving the UN Sustainable Development Goals	2024
Jeyakumar, A.; Giri, B.R.; Godbharle, S.	Impact of Water, Sanitation, and Hygiene (WaSH) interventions on diarrhoeal infections among children in the tribal regions of Palghar: a quasi-experimental study	2024
Zhu, Z.; Ka Shun Chan, F.K.S.; Li, G.; Xu, M.; Feng, M.; Zhu, Y.-G.	Implementing urban agriculture as nature-based solutions in China: Challenges and global lessons	2024
Malobane, M.E.; Nyambo, P.	Increasing Productivity Through Enhanced Water Use Efficiency in Marginal Soils	2024
Song, J.	Individual resilience to urban flooding and the implications for urban management	2024
Grembi, J.A.; Nguyen, A.T.; Riviere, M.; Heitmann, G.B.; Patil, A.; Athni, T.S.; Djajadi, S.; Ercümen, A.; Lin, A.; Crider, Y.; Mertens, A.; Karim, M.A.; Islam, M.O.; Miah, R.; Famida, S.L.; Hossen, M.S.; Mutsuddi, P.; Ali, S.; Rahman, M.Z.; Hussain, Z.; Shoab, A.K.; Haque, R.; Rahman, M.; Unicomb, L.; Luby, S.P.; Arnold, B.F.; Bennett, A.; Benjamin-Chung, J.	Influence of hydrometeorological risk factors on child diarrhea and enteropathogens in rural Bangladesh	2024
Maddox, A.	Insider and Outsider Cultures in Web3: Data Ownership, Transparency and Privacy	2024
Rafik F. Hirji, Alfred Duda	Integrated management of lakes, reservoirs, and their basins is critical for a climate-resilient planet: an urgent wake-up call from collective amnesia	2024
Assoua, J.E.; Bomdzele, E.; Omosehin, O.; Binuomote, S.O.; Osabuohien, E.; Enwa, S.; Okunade, S.O.	Integrating climate change, food safety, nutrition, and health outcomes in food systems policies and programs in Africa	2024
Salam, A.	Internet of Things for Sustainable Community Development: Wireless Communications, Sensing, and Systems: Second Edition	2024
Anand, S.; Enayati, M.; Raj, D.; Montresor, A.; Vinodini Ramesh, M.V.	Internet over the ocean: A smart IoT-enabled digital ecosystem for empowering coastal fisher communities	2024
Hossain, I.; Haque, A.K.M.M.; Ullah, S.M.A.	Intersecting Environmental Governance With Technological Advancements	2024
Juwana, I.; Lazuardi, S.V.; Herdiansyah, H.	Investigating the Factor of Water Consumption Regarding the Impact and Implementation of Water Governance in Urban Areas	2024
Dye, C.	Investing in Health and Wellbeing: When Prevention Is Better than Cure, Second Edition	2024
Wagner, J.; Koehler, J.; Dupuis, M.; Hope, R.	Is volumetric pricing for drinking water an effective revenue strategy in rural Mali?	2024
Beresford, M.; Brewis, A.; Choudhary, N.; Drew, G.; Garcia, N.E.; Garrick, D.; Hossain, M.J.; Lopez, E.; Ilboudo Nébié, E.I.; Pacheco-Vega, R.; Roque, A.; Wutich, A.	Justice and moral economies in “Modular, Adaptive, and Decentralized” (MAD) water systems	2024
Alazmi, H.J.; Mitchell, G.; Trigg, M.A.	Kuwait household water demand in 2050: Spatial microsimulation and impact appraisal	2024
Kohlitz, J.; Grant, M.; Budhathoki, R.B.; Chhetri, S.; Paneru, H.; Basnet, M.P.; Lala, S.; Halcrow, G.; Carrard, N.	Laying foundations for transformation: Insights from local government engagement on climate-resilient rural water services in Nepal	2024
Fein-Cole, M.J.; Esham, M.; Jayathilake, N.; Otoo, M.; Koliba, C.; Galford, G.L.; Porterfield, K.K.; Wijethunga, I.B.; Roy, E.D.	Lessons from the Short-Lived 2021 Fertilizer Import Ban in Sri Lanka Based on Analysis of Nutrient Flows	2024
Warren, C.; Glass, J.	Managing Scotland's Environment	2024
Summers, H.N.; Stone, T.F.; Dickey, L.C.; Rehmann, C.R.; Zimmerman, E.K.; Tyndall, J.C.; Liu, L.	Mapping barriers to food, energy, and water systems equity in the United States	2024
Zhao, B.; Cheah, P.K.; Moses, P.	Measurement and determinants of multidimensional urban poverty: Evidence from Shandong Province, China	2024
Marwala, T.	Mechanism Design, Behavioral Science and Artificial Intelligence in International Relations	2024
Davies, T.C.	Medical Geology of Africa	2024
Swenson, M.S.; Bansal, A.; Raiya, S.	MEDICAL, DENTAL, AND WELLNESS TOURISM: A Post-Pandemic Perspective	2024
Dayawansa, N.D.K.; Wickramasinghe, M.R.C.P.; Shahjahan Mondal, M.; Mondal, S.; Dongol, R.	Methodologies in interdisciplinary field research in water management: South Asian experiences	2024
Siphambe, T.V.; Aliyu, A.; Souadji, K.; Bayongwa, S.A.; Amans, T.; Fomena-Tchinda, H.; Banaon, P.Y.; Gina, C.S.; Vuai, H.A.; Farah, A.M.; Niang, A.B.; Taicha, A.; Ahmed, S.; Bashir, A.; Chérifa, C.; Mwamila, T.B.; Gwenzi, W.; Nya, E.L.; Noubactep, C.	Mitigating flash flooding in the city: Drain or harvest?	2024
Ober, J.; Karwot, J.; Sitinjak, C.	Modelling Possible Household Uses of Grey Water in Poland using Property Fitting Analysis	2024
Ionescu, R.-V.; Zlati, M.L.; Antohi, V.-M.; Cristea, D.S.; Petrea, Ș.M.; Fortea, C.	Modelling the economic and environmental impacts of water resources in the context of climate neutrality in the EUSDR member states	2024
Chai, J.; Zhang, W.; Zhao, K.; Li, S.; Jat Baloch, M.Y.J.; Wang, Z.; Zhang, D.; Yang, Y.	Multi-biological risk in groundwater-surface water system under landfill stress: Driven by bacterial size and biological toxicity	2024
Hemachandra, D.; Dissanayaka, S.	Natural resource management issues in human-influenced landscapes	2024
Singh, S.; Sivaram, N.; Dhanjal, D.S.; Assefa, H.; Singh, J.; Ramamurthy, P.C.	Navigating the Complexity of Emerging Contaminants: Sources, Impacts, and Remediation Strategies	2024
Isukuru, E.J.; Opha, J.O.; Isaiah, O.W.; Orovwighose, B.; Emmanuel, S.S.	Nigeria's water crisis: Abundant water, polluted reality	2024
Petropoulos, F.; Laporte, G.; Aktas, E.; Alumur, S.A.; Archetti, C.; Ayhan, H.; Battarra, M.; Bennell, J.A.; Bourjolly, J.-M.; Boylan, J.E.; Breton, M.; Canca, D.; Charlin, L.; Chen, B.; Cicek, C.T.; Cox, L.A.; Currie, C.S.M.; Demeulemeester, E.; Ding, L.; Disney, S.M.; Ehrgott, M.; Eppler, M.J.; Erdoğan, G.; Fortz, B.; Franco, L.A.; Frische, J.; Salvatore Greco, S.; Gregory, A.J.; Hämälainen, R.…	Operational Research: methods and applications	2024
Danert, K.	Opportunities and challenges	2024
Cannings, L.; W Hutton, C.W.; Sorichetta, A.; Nilsen, K.	Opposing objective and subjective wellbeing outcomes within an environmentally vulnerable delta: a case study of Volta Delta, Ghana	2024
Rajest, S.S.; Moccia, S.; Singh, B.; Regin, R.; Jeganathan, J.	Optimizing intelligent systems for cross-industry application	2024
Bose, D.; Bhattacharya, R.; Kaur, T.; Banerjee, R.; Bhatia, T.; Ray, A.; Batra, B.; Mondal, A.; Ghosh, P.; Mondal, S.	Overcoming water, sanitation, and hygiene challenges in critical regions of the global community	2024
Shabani, T.; Jerie, S.; Shabani, T.	Overview of quality health safety and environmental management systems implementation in Zimbabwe	2024
Oke, O.E.; Akosile, O.A.; Oni, A.I.; Opowoye, I.O.; Ishola, C.A.; Adebiyi, J.O.; Odeyemi, A.J.; Adjei-Mensah, B.; Uyanga, V.A.; Abioja, M.O.	Oxidative stress in poultry production	2024
Baka, W.K.; Rianse, I.S.; Zulfikar, Z.	Palm Oil Business Partnership Sustainability through the Role of Social Capital and Local Wisdom: Evidence from Palm Oil Plantations in Indonesia	2024
Whitmee, S.; Green, R.; Belesova, K.; Hassan, S.; Cuevas, S.; Murage, P.; Picetti, R.; Clercq-Roques, R.; Murray, K.A.; Falconer, J.; Anton, B.; Reynolds, T.; Sharma Waddington, H.; Hughes, R.C.; Spadaro, J.; Aguilar Jaber, A.; Saheb, Y.; Campbell-Lendrum, D.; Cortés-Puch, M.; Ebi, K.L.; Huxley, R.; Mazzucato, M.; Oni, T.; de Paula, N.; Peng, G.; Revi, A.; Rockström, J.; Srivastava, L.; Whitmarsh…	Pathways to a healthy net-zero future: report of the Lancet Pathfinder Commission	2024
Asefa, E.M.; Damtew, Y.T.; Ober, J.	Pesticide water pollution, human health risks, and regulatory evaluation: A nationwide analysis in Ethiopia	2024
Priadi, C.R.; Suleeman, E.; Darmajanti, L.; Putri, G.L.; Genter, F.; Foster, T.; Willetts, J.	Policy and regulatory context for self-supplied drinking water services in two cities in Indonesia: Priorities for managing risks	2024
Becher, O.; Verschuur, J.; Pant, R.; Hall, J.	Prioritising climate adaptation options to minimise financial and distributional impacts of water supply disruptions	2024
Qazi, A.; Simsekler, M.C.E.; Al-Mhdawi, M.K.S.	Prioritizing Indicators for Rapid Response in Global Health Security: A Bayesian Network Approach	2024
Singh, B.; Mal, G.; Kalra, R.S.; Marotta, F.	Probiotics as Live Biotherapeutics for Veterinary and Human Health, Volume 2: Functional Foods and Post-Genomics	2024
Upton, D.; Thirlaway, K.	Promoting Healthy Behaviour: A Practical Guide to Physical Health and Mental Wellbeing: Third Edition	2024
Baracho, R.O.; Bezerra, N.R.; Scalize, P.S.	Proposition and Application of a Conceptual Model for Risk Management in Rural Areas: Rural Basic Sanitation Safety Plan (RBSSP)	2024
Zlati, M.L.; Antohi, V.-M.; Ionescu, R.-V.; Iticescu, C.; Lucian, L.P.	Quantyfing the impact of the water security index on socio-economic development in EU27	2024
Duncan, G.J.; Gootman, J.A.; Nalamada, P.	Reducing intergenerational poverty	2024
Mintawati, H.; Lubis, R.; Usman, T.; Albert, J.; Saimi, S.; Fajar, M.	Relationship between Drinking Water Quality Source, Physical Aesthetic Aspects, and Nutritional Status of Toddlers Aged 6 - 24 Months in Cijeruk and Ciembu Villages, Sumedang Regency	2024
Hamilton, K.A.; Ciol Harrison, J.; Mitchell, J.; Weir, M.; Verhougstraete, M.; Haas, C.N.; Nejadhashemi, A.P.; Libarkin, J.; Gim Aw, T.; Bibby, K.; Bivins, A.; Brown, J.; Dean, K.; Dunbar, G.; Eisenberg, J.N.S.; Emelko, M.; Gerrity, D.; Gurian, P.L.; Hartnett, E.; Jahne, M.; Jones, R.M.; Julian, T.R.; Li, H.; Li, Y.; Gibson, J.M.; Medema, G.; Meschke, J.S.; Mraz, A.; Murphy, H.; Oryang, D.; Owusu…	Research gaps and priorities for quantitative microbial risk assessment (QMRA)	2024
Saha, D.; Dwivedi, S.N.; Ali, S.	Research on groundwater science and management in India	2024
El Bilali, H.; Dan Guimbo, I.; Nanema, R.K.; Hamidou, H.; Kiebre, Z.; Rokka, V.-M.; Tietiambou, S.R.F.; Nanema, J.; Dambo, L.; Grazioli, F.; Naino Jika, A.K.; Gonnella, M.; Acasto, F.	Research on Moringa (Moringa oleifera Lam.) in Africa	2024
Rodrigo Valencia Cotera, Sabine Egerer, Christine Nam, Ludwig Lierhammer, Lukas Moors	Resilient agriculture: water management for climate change adaptation in Lower Saxony	2024
Qudrat-Ullah, H.	Resilient Futures: System Dynamics, Tech Innovations, and Climate Resilience	2024
Muller, L.C.F.E.; Schaafsma, M.; Mazzoleni, M.; van Loon, A.F.	Responding to climate services in the context of drought: A systematic review	2024
Manisha, M.; Verma, K.; Chanakya, H.N.; Rao, L.	Reuse of Treated Wastewater: A Key Driver for Achieving All Sustainable Development Goals	2024
Anjali Manandhar-Sherpa, Christoph Lüthi, Guy Howard	Review of policies for building climate resilience in urban sanitation systems and services in Nepal	2024
Nagal, B.; Prabhakar, A.K.; Pal, M.	Role of climatic extremes in planning of water supply system (WSS)	2024
Yang, S.; Zheng, X.; Hou, J.; Geng, B.; Luo, L.; Zhu, C.; Liu, L.; Zhu, J.	Rural revival: Navigating environmental engineering and technology	2024
Jacob, D.E.; Nеlson, I.U.; Izah, S.C.; Daniel, K.S.	Rural Water Crises in the Global South: Understanding the Scope and Impact	2024
Aburamadan, R.; Cotella, V.A.; Darwish, R.	Sanitation infrastructure challenges in global south poverty pockets: Towards a multidisciplinary approach to sustainable health—The Jordanian case	2024
Bakobie, N.; Essandoh, H.M.K.; Oduro-Kwarteng, S.; Adjei, E.K.; Ahammad, S.Z.; Chakma, S.	Self-supply groundwater in five communities: Moshie Zongo, Aboabo, Kotei, Ayeduase and Apemso in Kumasi Metropolis, Ghana	2024
Baggio, G.; Adamowski, J.; Hyde, V.J.; Qadir, M.	Small-scale desalination and atmospheric water provisioning systems in water-scarce vulnerable communities: status and perspectives	2024
Sharifuzzaman, M.; Mun, H.-S.; Ampode, K.M.B.; Lagua, E.B.; Park, H.-R.; Kim, Y.-H.; Hasan, M.K.; Yang, C.-J.	Smart Pig Farming—A Journey Ahead of Vietnam	2024
Drakes, O.; Restrepo-Osorio, D.; Powlen, K.A.; Hines, M.	Social Vulnerability and Water Insecurity in the Western United States: A Systematic Review of Framings, Indicators, and Uncertainty	2024
Lawrence, G.	Societal Deception: Global Social Issues in Post-Truth Times	2024
Carolan, M.S.	Society and the Environment: Pragmatic Solutions to Ecological Issues: 4th Edition	2024
Khan, R.H.; Fenner, R.A.	Socio-Demographic Factors Driving the Choice of Alternative Safe Water Sources and Their Implications for Public Health: Lessons from Goalmari, Bangladesh	2024
Chandrappa, R.; Das, D.	Solid Waste Management: Principles and Practice: Second Edition	2024
Armando, C.J.; Rocklöv, J.; Sidat, M.; Tozan, Y.; Mavume, A.F.; Bunker, A.; Sewe, M.O.	Spatial-temporal analysis of climate and socioeconomic conditions on cholera incidence in Mozambique from 2000 to 2018: an ecological longitudinal retrospective study	2024
Ogunbode, T.O.; Esan, V.I.; Oyebamiji, V.O.; Akande, J.A.	Sustainable development goal 6 and the challenge of pipe-borne water connectivity in a growing tropical city: a case study	2024
Kilkis, S.; Krajačić, G.; Duić, N.; Rosen, M.A.; Al-Nimr, M.	Sustainable development of energy, water and environment systems as a key opportunity for decarbonisation	2024
Sharma, A.; Moses, O.; Sharma, R.B.; Gupta, S.	Sustainable Innovation for Industry 6.0	2024
Chilaka, C.; Rinehart, A.J.; Wang, H.; Ward, F.A.	Sustaining aquifers hydrologically, economically, and institutionally: Policy analysis of the Ogallala in New Mexico	2024
Saba, A.O.; Eyo, V.O.; Elegbede, I.O.; Fakoya, K.A.; Ojewole, A.E.; Dawodu, F.O.; Adewale, R.A.; Amal, M.N.A.	Sustaining the blue bounty: Fish food and nutrition security in Nigeria’s evolving blue economy	2024
Garg, A.	Technological innovations in the food service industry	2024
Nwokolo, S.C.; Singh, R.; Khan, S.; Kumar, A.	Technological Pathways for Africa's Net-Zero Economy: Technology Solutions to Unlock Africa's Sustainable Future	2024
Becher, O.; Smilovic, M.; Verschuur, J.; Pant, R.; Tramberend, S.; Hall, J.	The challenge of closing the climate adaptation gap for water supply utilities	2024
Balarabe, K.	The COVID-19 pandemic and access to clean water: challenges and opportunities	2024
Edwards, E.; Sanchez, L.; Sekhri, S.	The Economics of Drought	2024
Folland, S.; Goodman, A.C.; Stano, M.; Danagoulian, S.	The Economics of Health and Health Care, Ninth Edition	2024
Nulkar, G.	The Economics of Sustainable Development: A Machine-generated Literature Overview	2024
Mahmood, H.; Furqan, M.; Meraj, G.; Hassan, M.S.	The effects of COVID-19 on agriculture supply chain, food security, and environment: a review	2024
Gupta, P.; Srivastava, R.; Jain, S.; Jain, S.P.	The Ethics of Unhealthy Food and Beverage Advertising to Children: A Bibliometric Analysis and Future Research Agenda	2024
Bhargavan, J.; Ayikkara Kizhakkayil, K.	The Evolution of Potable Water Security: A Temporal Analysis of Key Indices and Trends	2024
Middleton, N.	The Global Casino: An Introduction to Environmental Issues, SEVENTH EDITION	2024
Barbosa, M.W.; Cansino, J.M.	The impacts of environmental collaboration on the environmental performance of agri-food supply chains: a mediation-moderation analysis of external pressures	2024
Zhang, C.; Gu, B.; Liang, X.; Lam, S.K.; Zhou, Y.; Chen, D.	The role of nitrogen management in achieving global sustainable development goals	2024
Yehia, A.G.; Mehany, M.A.S.; Fareed, A.M.; El-Sayed, W.H.; Taman, M.S.	The role of water safety plan (WSP) to enhance the compatibility in water sector, Egypt	2024
Moon, M.P.	The silent threat: Unveiling climate change’s water and health challenges in Bangladesh	2024
Gorna, A.	The Spatial Organisation of Urban Agriculture in the Global South: Food Security and Sustainable Cities	2024
Chávez Santos, R.C.; Rituay, A.M.C.; Rascón, J.; Sánchez Bardales, E.S.; Reina Marín, Y.R.; Santos, Y.T.C.; Guevara, R.C.	The Transformative Power of Environmental Education in the Consumption of Safety: The Case of a Popular Housing Estate	2024
Zulqarnain, A.; Khan, M.A.	Thirsty nation: An investigation into water scarcity and public conservation behaviour in Pakistan	2024
Tesfay Abraha, A.; Assefa Woldeamanuel, T.; Gebremariam Beyene, E.	Tracking and tracing water consumption for informed water sensitive intervention through machine learning approach	2024
Sekgobela, J.M.; Khabo-Mmekoa, C.M.; Momba, M.N.B.	Tracking enteric pathogen contamination from on-site sanitation facilities to groundwater in selected rural areas of Vhembe District Municipality, Limpopo Province, South Africa	2024
Trail, S.M.; Ward, F.A.	Uniting agricultural water management, economics, and policy for climate adaptation through a new assessment of water markets for arid regions	2024
Boafo, Y.A.; Ohemeng, F.N.A.; Ayivor, J.; Ayitiah, J.A.; Yirenya-Tawiah, D.; Mensah, A.; Datsa, C.; Annang, T.Y.; Adom, L.	Unraveling diarrheal disease knowledge, understanding, and management practices among climate change vulnerable coastal communities in Ghana	2024
Gambo, J.; Aliaa Binti Roslan, S.N.; Mohd Shafrib, H.Z.; Che Ya, N.N.; Yusuf, Y.A.	Unveiling groundwater potential zones as catalyst for multidimensional poverty reduction using analytical hierarchical process and geospatial decision support systems (S-DSS) approach in the semiarid region, Jigawa, Nigeria	2024
Butler, D.; Digman, C.; Makropoulos, C.; Davies, J.W.	Urban Drainage, Fifth Edition	2024
Zang, J.; Kumar, M.; Kumar, R.	Urban maintenance and robustness	2024
Chinangwa, W.; Chinangwa, L.	Urban water sector management, challenges, opportunities and cross-cutting issues: A case of Malawi’s urban water sector	2024
Mosharaf, M.K.; Gomes, R.L.; Cook, S.; Alam, M.S.; Rasmusssen, A.	Wastewater reuse and pharmaceutical pollution in agriculture: Uptake, transport, accumulation and metabolism of pharmaceutical pollutants within plants	2024
Carmo Dos Santos, M.; Cerqueira Silva, A.C.; Dos Reis Teixeira, C.; Pinheiro Macedo Prazeres, F.; Fernandes Dos Santos, R.; de Araújo Rolo, C.; Santos, E.; Fonseca, M.; Oliveira Valente, C.; Hodel, K.V.; Moraes Dos Santos Fonseca, L.; Fiuza, B.; Bueno, R.; de Andrade, J.; Aparecida Souza Machado, B.	Wastewater surveillance for viral pathogens: A tool for public health	2024
J. Charles, K.J.	Water and sanitation	2024
Tella, T.A.; Festus, B.; Olaoluwa, T.D.; Oladapo, A.S.	Water and wastewater treatment in developed and developing countries: Present experience and future plans	2024
Delgado, A.; Rodriguez, D.J.; Amadei, C.A.; Makino, M.	Water in Circular Economy and Resilience (WICER) Framework	2024
Wutich, A.	Water insecurity is human: why social science must be at the core of water security research and practice	2024
Naik, G.D.	Water Justice and Groundwater Subsidies in India: Equitable and Sustainable Access and Regulation	2024
Kumar, R.; Mishra, A.; Goyal, M.K.	Water neutrality: Concept, challenges, policies, and recommendations	2024
Conway, D.	Water on the mind: Mapping behavioral and psychological research on water security	2024
Hazarika, B.; Kar, B.K.	Water security in Guwahati City (India): examining present status and emerging challenges	2024
Dembedza, V.P.; Chopera, P.; Macheka, L.	Water, Sanitation and Hygiene practices in areas affected by Cyclone Idai in Zimbabwe	2024
Mbana, Z.; Sinthumule, N.I.	What is there to drink? Water (in)justice in the democratic South Africa	2024
Willemin, R.; Backhaus, N.	“The pesticides burned the grass and the know-how”: Farmers’ oral history and chemoethnography of Swiss Jura slowly violent waterscapes	2023
Singh, A.K.; Singh, S.	A case study from Kanpur Nagar, Uttar Pradesh for assessing the economic value of water and its determinants	2023
Hammonds, E.; Markel, H.; Rosner, D.; Stevens, R.; DeStefano, L.H.; Schultz, A.; Berkowitz, E.	A History of the National Academy of Medicine: 50 Years of Transformational Leadership (2022)	2023
Rangwala, T.; Mukheibir, P.; Fane, S.	A Review and Comparative Analysis of IWCM Concepts in Australia and Similar Jurisdictions	2023
Ayling, S.; Milusheva, S.; Kashangura, F.M.; Hoo, Y.R.; Sturrock, H.; Joseph, G.	A stitch in time: The importance of water and sanitation services (WSS) infrastructure maintenance for cholera risk. A geospatial analysis in Harare, Zimbabwe	2023
Northrop, E.; Konar, M.; Frost, N.; Hollaway, E.	A Sustainable and Equitable Blue Recovery to the COVID-19 Crisis	2023
Yasmin, T.; Dhesi, S.; Kuznetsova, I.; Cooper, R.; Krause, S.; Lynch, I.	A system approach to water, sanitation, and hygiene resilience and sustainability in refugee communities	2023
Stone, T.F.; Dickey, L.C.; Summers, H.N.; Thompson, J.R.; Rehmann, C.R.; Zimmerman, E.K.; Tyndall, J.C.	A systematic review of social equity in FEWS analyses	2023
Tumwebaze, I.K.; Sseviiri, H.; Bateganya, F.H.; Twesige, J.; Scott, R.; Kayaga, S.; Kulabako, R.; Howard, G.	Access to and factors influencing drinking water and sanitation service levels in informal settlements: Evidence from Kampala, Uganda	2023
Pratt, C.; Kesande, M.; Tusabe, F.; Medley, A.; Prentice-Mott, G.; Lozier, M.; Trinies, V.; Yapswale, S.; Nabatyanga, S.; Isabirye, H.; Lamorde, M.; Berendes, D.	Access to and Use of Hand Hygiene Resources during the COVID-19 Pandemic in Two Districts in Uganda, January–April 2021	2023
Krist, A.H.; South-Paul, J.; Meisnere, M.	Achieving whole health: A new approach for veterans and the nation	2023
Barabino, G.A.; Fiske, S.T.; Scherer, L.A.; Vargas, E.A.	Advancing antiracism, diversity, equity, and inclusion in STEMM organizations: Beyond broadening participation (2023)	2023
Binns, T.; Nel, E.; Dixon, A.; Lynch, K.	Africa: Diversity and Development, Second edition	2023
Vallero, D.A.	Air Pollution Calculations: Quantifying Pollutant Formation, Transport, Transformation, Fate and Risks, Second Edition	2023
Babor, T.F.; Casswell, S.; Graham, K.; Huckle, T.; Livingston, M.; Österberg, E.; Rehm, J.; Room, R.; Rossow, I.; Sornpaisarn, B.	Alcohol: No ordinary commodity research and public policy	2023
Joshua, I.D.; Salihu, A.C.; Mshelia, A.M.; Ubachukwu, N.N.	ANALYSIS OF COMMUNITY-BASED PATTERN OF WATER DEMAND AND SUPPLY	2023
Twinomucunguzi, F.R.B.; Nyenje, P.M.; Semiyaga, S.; Kebirungi, P.; Kulabako, R.; Kansiime, F.	Antibiotics in shallow groundwater underlying urban informal settlements in developing countries: influence of on-site sanitation practices and risk assessment	2023
Chhetri, B.	Assessing the urban sustainability of the slum settlements in the hill resorts of India: a case study of Darjeeling town	2023
Chavarria, K.A.; Gonzalez, C.I.; Goodridge, A.; Saltonstall, K.; Nelson, K.L.	Bacterial communities in a neotropical full-scale drinking water system including intermittent piped water supply, from sources to taps	2023
Araya, F.; Singer, R.; Charnitski, J.; Faust, K.M.	Beyond the Pipes: How User Perceptions Influence Their Water and Wastewater Infrastructure Interactions in Texas Colonias	2023
Bhatia, S.; Singh, S.P.	Can an Incentivized Command-and-Control Approach Improve Groundwater Management? An Analysis of Indian Punjab	2023
Mukasi, T.J.; Oni, O.	Challenges in Implementing ICT Tools in Water and Sanitation Services Management in South Africa	2023
Frumkin, H.; Thomson, M.C.	Climate Change and Health in the Tropics: Current Status and Future Trends	2023
Neira, M.; Erguler, K.; Ahmady-Birgani, H.; DaifAllah Al-Hmoud, N.; Fears, R.; Gogos, C.; Hobbhahn, N.; Koliou, M.; Kostrikis, L.G.; Lelieveld, J.; Majeed, A.; Paz, S.; Rudich, Y.; Saad-Hussein, A.; Shaheen, M.; Tobías, A.; Christophides, G.	Climate change and human health in the Eastern Mediterranean and middle east: Literature review, research priorities and policy suggestions	2023
Li, J.; Li, X.; Liu, H.; Gao, L.; Wang, W.; Wang, Z.; Zhou, T.; Wang, Q.	Climate change impacts on wastewater infrastructure: A systematic review and typological adaptation strategy	2023
Hossain, D.; Rahman, N.; Karim, M.R.; Bristi, S.Z.T.; Uddin, N.; Uddin, A.H.M.M.	Climate resilient livestock production system in tropical and subtropical countries	2023
Allen, L.; Hutton, R.	Closing the opportunity gap for young children	2023
Deb, S.; Sunny, A.M.; Sanyal, N.; Deb, S.	Community Psychology: Emerging Issues and Challenges	2023
Creaven, S.	Contagion Capitalism: Pandemics in the Corporate Age	2023
Brouwer, R.; Sharmin, D.F.; Elliott, S.; Liu, J.; Khan, M.R.	Costs and benefits of improving water and sanitation in slums and non-slum neighborhoods in Dhaka, a fast-growing mega-city	2023
Sherertz, R.J.; Abramson, J.S.	Covid chaos: What happened and Why	2023
Mare, R.; Mare, C.; Hadarean, A.; Hotupan, A.; Rus, T.	COVID-19 and Water Variables: Review and Scientometric Analysis	2023
Rahimi Midani, A.	Deep Technology for Sustainable Fisheries and Aquaculture	2023
Amin, N.; Haque, R.; Rahman, M.Z.; Mahmud, Z.H.; Hasan, R.; Islam, M.T.; Sarker, P.; Sarker, S.; Adnan, S.D.; Akter, N.; Johnston, D.; Rahman, M.; Liu, P.; Wang, Y.; Shirin, T.; Bhattacharya, P.	Dependency of sanitation infrastructure on the discharge of faecal coliform and SARS-CoV-2 viral RNA in wastewater from COVID and non-COVID hospitals in Dhaka, Bangladesh	2023
Pandey, V.C.; Gajić, G.; Lebrun, M.; Mahajan, P.	Designer Cropping Systems for Polluted Land	2023
Howlett, M.	Designing Public Policies: Principles and Instruments, Third Edition	2023
Clinton, C.; Addo, L.Y.; Ebekozien, A.; Thwala, W.D.; Arthur-Aidoo, B.M.	Developing a framework for effective institutional management of Ghana's urban water supply	2023
Phillips, B.D.; Mincin, J.	Disaster Recovery, Third Edition	2023
Nielsen, B.B.; Wechtler, H.; Zheng, L.G.	Disasters and international business: Insights and recommendations from a systematic review	2023
Chung, H.; Kumpel, E.; Oke, J.	Drinking water accessibility typologies in low- and middle-income countries	2023
Simaubi, M.; Banda, K.; Levy, J.; Meiman, J.; Nyambe, I.	Dye tracing of the Lusaka karstified aquifer system: implications towards urban groundwater quality protection	2023
Azeez, P.A.; Raj, P.P.; Rangaswamy, R.	Ecological and evolutionary perspectives on infections and morbidity	2023
Heffelfinger, J.R.; Krausman, P.R.	Ecology and Management of Black-tailed and Mule Deer of North America	2023
Ćetković, J.; Žarković, M.; Vujadinović, R.; Knežević, M.; Živković, A.	Economic vulnerability assessment in the water sector with a focus on electricity production in hydropower plants: Case of Montenegro	2023
Falcone, M.; Salvinelli, C.; Bah, M.; Thomas, E.	Effectiveness of a water-vending kiosk intervention toward household water quality and surveyed water security in Freetown, Sierra Leone	2023
Biswas, T.; Pal, S.C.; Chowdhuri, I.; Ruidas, D.; Saha, A.; ISLAM, A.R.M.T.; Shit, M.	Effects of elevated arsenic and nitrate concentrations on groundwater resources in deltaic region of Sundarban Ramsar site, Indo-Bangladesh region	2023
LaPatin, M.; Barrens, S.; Poleacovschi, C.; Vaziri, B.; Spearing, L.; Padgett-Walsh, K.; Feinstein, S.; Rutherford, C.; Nguyen, L.; Faust, K.M.	Engineering in a Crisis: Observing Students' Perceptions of Macroethical Responsibilities during Pandemics and Natural Disasters	2023
Mohan, M.; Pachaiappan, R.; Mahendra Gowda, R.V.; Aroulmoji, V.	Environmental and Health Effects of Emerging Contaminants – A Critical Review	2023
Troy, T.J.; Bowling, L.C.; Jame, S.A.; Lee, C.I.; Liu, J.; Perry, C.; Richter, B.	Envisioning a sustainable agricultural water future across spatial scales	2023
Sweeney, S.	European Union in the Global Context, Second Edition	2023
Bhandari, P.; Creighton, D.; Gong, J.; Boyle, C.; Law, K.M.Y.	Evolution of cyber-physical-human water systems: Challenges and gaps	2023
Mikio Ishiwatari, K. Nagata, M. Matsubayashi	Evolving water resources management in response to socio-economical changes: Japanese experience in modernization over the past century	2023
Wang, H.-C.	Examining the impact of in-situ infrastructural upgrading on sustainability in informal settlements: The case of Accra, Ghana	2023
van den Berg, H.; Rickert, B.; Lock-Wah-Hoon, J.; Onjia, D.; Bijelović, S.; Gligorijevic, S.; Karadžić, V.; Vasić, M.; de Roda-Husman, A.M.	Experiences from integrating waterãnd sanitation safety planning in small systems in rural Serbia	2023
Accorsi, R.; Guidani, B.; Ronzoni, M.; Manzini, R.; Ferrari, E.	Exploring strategies, technologies, and novel paradigms for sustainable agri-food supply chain ecosystems design and control	2023
Ahmed, S.; Fatema, N.	Factors and practices: Farmers’ adaptation to climate change in Bangladesh	2023
Budiono, S.; Purba, J.T.	Factors of foreign direct investment flows to Indonesia in the era of COVID-19 pandemic	2023
Burke, S.P.; Polsky, D.E.; Geller, A.B.	Federal policy to advance racial, ethnic, and tribal health equity	2023
Brears, R.C.	Financing Water Security and Green Growth	2023
Vahabzadeh, M.; Afshar, A.; Molajou, A.	Framing a novel holistic energy subsystem structure for water-energy-food nexus based on existing literature (basic concepts)	2023
Marchesi, M.D.T.; Do Couto, E.V.; Gomes, U.A.F.	Geographical inequalities in access to water and sanitation among Brazilian maritime islands’ inhabitants	2023
Irfeey, A.M.M.; Mohamed Najim, M.M.M.; Alotaibi, B.A.; Traore, A.	Groundwater Pollution Impact on Food Security	2023
Agarwal, V.	Health Communication for Social Justice: A Whole Person Activist Approach	2023
Corcoran, N.	HEALTH PROMOTION: THE BASICS	2023
Zhou, S.; Ding, X.; Leung, J.T.Y.	Healthy Aging at Family Mealtimes: Associations of Clean Cooking, Protein Intake, and Dining Together with Mental Health of Chinese Older Adults amid COVID-19 Pandemic	2023
de Weerth, C.; Aatsinki, A.-K.; Azad, M.B.; Bartol, F.F.; Bode, L.; Collado, M.C.; Dettmer, A.M.; Field, C.J.; Guilfoyle, M.; Hinde, K.; Korosi, A.; Lustermans, H.; Mohd Shukri, N.H.; Moore, S.E.; Pundir, S.; Rodríguez-Gómez, J.M.; Slupsky, C.M.; Turner, S.; van Goudoever, J.B.; Ziomkiewicz, A.; Beijers, R.	Human milk: From complex tailored nutrition to bioactive impact on child cognition and behavior	2023
Wiedemann, R.; Inauen, J.	Identifying determinants of pesticide use behaviors for effective agri-environmental policies: a systematic review	2023
Jeuland, M.; Orgill-Meyer, J.; Morgan, S.; Hudner, D.; Pucilowski, M.; Wyatt, A.; Shafei, M.; Cajka, J.; Albert, J.	Impact Evaluation of Water Infrastructure Investments: Methods, Challenges and Demonstration From a Large-Scale Urban Improvement in Jordan	2023
Tyler Kozole, Marlaina Ross, Chris Nicoletti, Jennifer Rogla, Nate Ives	Impact of targeted subsidies on access to resilient sanitation for climate-vulnerable households in rural Cambodia	2023
Malemba, E.; Masinde, W.	Impact of the policy framework and institutional setup on urban water supply in Malawi: The case of the Lilongwe Water Board	2023
Koç, C.; Bayazıt, Y.; Özgül, S.Y.	Impact of tourists on urban water needs in Marmaris, Türkiye	2023
Tan Soo, J.-S.; Li, J.; Qin, P.	Individuals' and households' climate adaptation and mitigation behaviors: A systematic review	2023
Senna, D.A.; Moreira, V.R.; Amaral, M.C.S.; de Paula, E.C.; Pereira, L.P.; Batista, R.M.G.; Ferreira, L.A.F.; Rezende, S.	Industry 4.0 as a strategy to contribute to the water supply universalization in developing countries	2023
Platts, P.J.; Schaafsma, M.; Kerry Turner, R.K.; Burgess, N.D.; Fisher, B.; Mbilinyi, B.P.; Munishi, P.K.T.; Ricketts, T.H.; Swetnam, R.D.; Ahrends, A.; Ashagre, B.B.; Bayliss, J.; Gereau, R.E.; Green, J.M.H.; Green, R.E.; Jeha, L.; Lewis, S.L.; Marchant, R.; Marshall, A.R.; Morse-Jones, S.; Mwakalila, S.; Njana, M.A.; Shirima, D.D.; Willcock, S.; Balmford, A.	Inequitable Gains and Losses from Conservation in a Global Biodiversity Hotspot	2023
Momberg, D.J.; Bell, R.; Norris, S.A.; Ngandu, C.B.; Richter, L.M.; Murphy-Alford, A.J.; Saïd-Mohamed, R.	Infection, nutritional status, and body composition: Associations at birth and 6 months postnatally in Soweto, South Africa	2023
Nya, E.L.; Mwamila, T.B.; Komguem-Poneabo, L.; Njomou-Ngounou, E.L.; Fangang-Fanseu, J.; Tchoumbe, R.R.; Tepong-Tsindé, R.; Gwenzi, W.; Noubactep, C.	Integrated Water Management in Mountain Communities: The Case of Feutap in the Municipality of Bangangté, Cameroon	2023
Wakwella, A.; Wenger, A.; Jenkins, A.; Lamb, J.; Kuempel, C.D.; Claar, D.; Corbin, C.; Falinski, K.; Rivera, A.; Grantham, H.S.; Jupiter, S.	Integrated watershed management solutions for healthy coastal ecosystems and people	2023
Ward, F.A.	Integrating water science, economics, and policy for future climate adaptation	2023
Smith, D.W.; Wind, S.; Markov, I.A.; Ongom, S.A.; Davis, J.	Inter- and intra-rater reliability of handpump functionality field tests	2023
Rimba, A.B.; Hirabayashi, Y.	Interlinkages of Water-Related SDG Indicators Globally and in Low-Income Countries	2023
Clarke, T.	International Corporate Governance: Third Edition	2023
Arion, I.D.; Arion, F.H.; Taut, I.; Mureşan, I.C.; Ilea, M.; Dirja, M.	Investment in Forest Watershed—A Model of Good Practice for Sustainable Development of Ecosystems	2023
Charles, I.; Salinger, A.; Sweeney, R.; Batagol, B.; Barker, S.F.; Nasir, S.; Taruc, R.R.; Francis, N.; Clasen, T.; Sinharoy, S.S.	Joint Food and Water Insecurity Had a Multiplicative Effect on Women's Depression in Urban Informal Settlements in Makassar, Indonesia during the COVID-19 Pandemic	2023
Murrey, A.; Daley, P.	Learning disobedience: Decolonizing development studies	2023
Wutich, A.; Thomson, P.; Jepson, W.; Stoler, J.; Cooperman, A.D.; Doss-Gollin, J.; Jantrania, A.; Mayer, A.; Nelson-Núñez, J.; Walker, W.S.; Westerhoff, P.	MAD water: Integrating modular, adaptive, and decentralized approaches for water security in the climate change era	2023
Khanal, G.; Maraseni, T.; Thapa, A.; Devkota, N.; Paudel, U.R.; Khanal, C.K.	Managing water scarcity via rainwater harvesting system in Kathmandu Valley, Nepal: People's awareness, implementation challenges and way forward	2023
Stoler, J.; Guzmán, D.B.; Adams, E.A.	Measuring transformative WASH: A new paradigm for evaluating water, sanitation, and hygiene interventions	2023
Yadav, M.R.; Kumar, S.; Lal, M.K.; Kumar, D.; Kumar, R.; Yadav, R.K.; Nanda, G.; Singh, J.; Udawat, P.; Meena, N.K.; Jha, P.K.; Minkina, T.; Glinushkin, A.P.; Kalinitchenko, V.P.; Rajput, V.D.	Mechanistic Understanding of Leakage and Consequences and Recent Technological Advances in Improving Nitrogen Use Efficiency in Cereals	2023
Alley, K.D.	Microbial Machines: Experiments with Decentralized Wastewater Treatment and Reuse in India	2023
Castro, A.E.; Obusan, M.C.M.	Microbial quality and emerging pollutants in freshwater systems of Mega Manila, Philippines: a scoping review	2023
Traoré, O.; Kpoda, D.S.; Dembelé, R.; Saba, C.K.S.; Cairns, J.; Barro, N.; Haukka, K.	Microbiological and Physicochemical Quality of Groundwater and Risk Factors for Its Pollution in Ouagadougou, Burkina Faso	2023
Yu, W.; Wanza, P.; Kwoba, E.; Mwangi, T.; Okotto-Okotto, J.; Trajano Gomes da Silva, D.; Wright, J.A.	Modelling seasonal household variation in harvested rainwater availability: a case study in Siaya County, Kenya	2023
Fongoh, E.J.; Celle, H.; Nlend, B.; Boum-Nkot, S.N.; Ako, A.A.; Huneau, F.; Caillon, N.; Ntamak-Nida, M.J.	Multitracer approach towards an improved understanding of shallow hard rock aquifers and a more sustainable groundwater management, case of Yaounde, Cameroon	2023
Upadhyay, M.; Sherly, M.A.	Multivariate framework for integrated drought vulnerability assessment – An application to India	2023
Majeed, M.; Muhammad, M.; Nawaz, S.; Naz, T.; Iqbal, M.M.; Zahid, N.; Hussain, M.; Nawaz, A.N.; Abbas, G.; Gulshan, A.B.; Mehboob, M.	Nanopriming for crop management for sustainable agriculture: An overview	2023
Titumir, R.A.; Afrin, T.; Islam, M.	Natural Resource Degradation and Human-Nature Wellbeing: Cases of Biodiversity Resources, Water Resources, and Climate Change	2023
Frilingou, N.; Xexakis, G.; Koasidis, K.; Nikas, A.; Campagnolo, L.; Delpiazzo, E.; Chiodi, A.; Gargiulo, M.; McWilliams, B.; Koutsellis, T.; Doukas, H.	Navigating through an energy crisis: Challenges and progress towards electricity decarbonisation, reliability, and affordability in Italy	2023
Kalbar, P.P.; Lokhande, S.	Need to adopt scaled decentralized systems in the water infrastructure to achieve sustainability and build resilience	2023
Puppala, H.; Ahuja, J.; Tamvada, J.P.; Peddinti, P.R.T.	New technology adoption in rural areas of emerging economies: The case of rainwater harvesting systems in India	2023
Ottinger, M.A.; Geiselman, C.	One Health Meets the Exposome: Human, Wildlife, and Ecosystem Health	2023
Basha, J.S.; Adewole, J.K.; Yeneneh, A.M.; Abidoye, L.K.	Opportunities and challenges in climate-friendly clean water and energy technologies	2023
Sakti, A.D.; Mahdani, J.N.; Santoso, C.; Ihsan, K.T.N.; Nastiti, A.; Shabrina, Z.; Safira, M.; Rohmat, F.; Yulianto, F.; Virtriana, R.	Optimizing city-level centralized wastewater management system using machine learning and spatial network analysis	2023
Tekile, A.; Legesse, Y.S.	Overall performance evaluation of an urban water supply system: a case study of Debre Tabor Town in Ethiopia	2023
Ndekezi, M.; Kaluli, J.W.; Home, P.G.	Performance evaluation of sand dams as a rural rainwater conservation and domestic water supply technology in East-African drylands, a case-study from South-Eastern Kenya	2023
Agarwal, S.; Kothiwal, K.; Verma, S.; Verma, N.; Vishvakarma, K.	Perseverance in the Face of Water Scarcity in Hot Summer Seasons: A Case Study of Slum Communities in Indore, India	2023
Constantin, D.-L.; Goschin, Z.; Serbanica, C.	Piped water supply and usage and the question of services of general interest: a spatial panel data analysis	2023
Brinkley, C.; Raj, S.; Raja, S.	Planning for FEWsheds: The Role of Planning in Integrating and Strengthening Food, Energy and Water Systems	2023
Caves, R.W.; Barry Cullingworth, J.	PLANNING IN THE USA: Policies, Issues, and Processes, Fifth Edition	2023
Pakizer, K.; Lieberherr, E.; Farrelly, M.; Bach, P.M.; Saurí, D.; March, H.; Hacker, M.; Binz, C.	Policy sequencing for early-stage transition dynamics – A process model and comparative case study in the water sector	2023
Reader, G.T.	Preparing Today for Nourishing Tomorrow: A Perspective	2023
Islam, M.S.; Chowdhury, M.R.K.; Bornee, F.A.; Chowdhury, H.A.; Billah, B.; Kader, M.; Rashid, M.	Prevalence and Determinants of Diarrhea, Fever, and Coexistence of Diarrhea and Fever in Children Under-Five in Bangladesh	2023
Katsagoni, C.N.; Kokkinos, P.; Sidossis, L.S.	Prevention and Management of Cardiovascular and Metabolic Disease: Diet, Physical Activity and Healthy Aging	2023
Inwald, J.F.; Bruine De Bruin, W.; Yaggi, M.; Árvai, J.	Public Concern about Water Safety, Weather, and Climate: Insights from the World Risk Poll	2023
Shultz, J.M.; Sullivan, L.M.; Galea, S.	Public Health: An Introduction to the Science and Practice of Population Health	2023
Bhattarai, U.; Maraseni, T.; Apan, A.; Devkota, L.P.	Rationalizing donations and subsidies: Energy ecosystem development for sustainable renewable energy transition in Nepal	2023
Phiri, L.; Etale, A.; Thatcher, A.	Reclaimed water systems in office buildings: Perceptions of building facilities managers	2023
Nemati, M.; Schwabe, K.	Re-examining the water affordability: A comparison of alternative measures	2023
Zeitoun, M.	Reflections: Understanding Our Use and Abuse of Water	2023
Djeunankan, R.; Njangang, H.; Tadadjeu, S.; Kamguia, B.	Remittances and energy poverty: Fresh evidence from developing countries	2023
Bertha Darteh, Olufunke Cofie, Josiane Nikiema, Everisto Mapedza, Solomie Gebrezgabher	Response to COVID-19: building resilience through water and wastewater management in Ghana	2023
Noor, R.; Pande, C.B.; Zahra, S.M.; Maqsood, A.; Baig, A.; Misaal, M.A.; Noor, R.S.; Abbas, Q.; Anwar, M.	Review of Various Impacts of Climate Change in South Asia Region, Specifically Pakistan	2023
Carmody, P.R.; Murphy, J.T.; Grant, R.; Owusu, F.Y.	RGS-IBG book series the urban question in Africa: Uneven geographies of transition	2023
Othoo, C.O.; Olago, D.; Ayah, R.	Risk assessment of Sanitation and water Infrastructure in informal settlements of Kisumu: Implications for Hygiene and Public Health	2023
Ha, L.T.	Scrutinizing the nexus between green innovations and the sustainability of environmental system: novel insights from European database	2023
Broyles, L.M.T.; Pakhtigian, E.L.; Aziz, S.; Akanda, A.S.; Mejia, A.	Seasonal variation in household water insecurity in rural Bangladesh: A longitudinal analysis	2023
Ayeta, E.G.; Yafetto, L.; Lutterodt, G.; Ogbonna, J.F.; Miyittah, M.K.	Seasonal variations and health risk assessment of microbial contaminations of groundwater in selected coastal communities of Ghana	2023
Shafi, M.; Jan, R.; Gani, K.M.	Selection of priority emerging contaminants in surface waters of India, Pakistan, Bangladesh, and Sri Lanka	2023
Maqbool, N.; Shahid, M.A.; Khan, S.J.	Situational assessment for fecal sludge management in major cities of Pakistan	2023
Rizvi Jafree, S.R.	Social Policy for Women in Pakistan	2023
Hampton, T.	Societal drivers of antimicrobial resistance	2023
Zong, Y.; Chen, S.S.; Kattel, G.R.; Guo, Z.	Spatial distribution of non-point source pollution from total nitrogen and total phosphorous in the African city of Mwanza (Tanzania)	2023
Aina, I.V.; Thiam, D.R.; Dinar, A.	Substitution of piped water and self-supplied groundwater: The case of residential water in South Africa	2023
Angelakis, A.N.; Capodaglio, A.G.; Passchier, C.W.; Valipour, M.; Krasilnikoff, J.; Tzanakakis, V.A.; Sürmelihindi, G.; Baba, A.; Kumar, R.; Haut, B.; Roubelakis, M.G.; Min, Z.; Dercas, N.	Sustainability of Water, Sanitation, and Hygiene: From Prehistoric Times to the Present Times and the Future	2023
Becker, P.	Sustainability Science: Managing Risk and Resilience for Sustainable Development	2023
Nelson, W.M.	Sustainable Agricultural Chemistry in the 21st Century: Green Chemistry Nexus	2023
Lamano-Ferreira, M.L.; Dalmas, F.B.; Sant’Anna, M.; Rodrigues, E.A.; Sodré, M.G.	Sustainable development in São Paulo's Green Belt Biosphere Reserve: between the void of municipal environmental policies and the ecosystem management of the territory; Desenvolvimento sustentável na Reserva da Biosfera do Cinturão Verde da Cidade de São Paulo: entre o vazio das políticas ambientais municipais e a gestão ecossistêmica do territorio; Desarrollo sostenible en la Reserva de la Biosf…	2023
Dou, H.; Cheng, G.; Zhang, J.; Wang, C.	Sustainable development strategies in multi-scenario of rural production space system: A case from mountainous and hilly countryside in southwest China	2023
Wudil, A.H.; Ali, A.; Raza, H.A.; Hameed, M.U.; Jellason, N.P.; Ogbaga, C.C.; Singh, K.; Çig, F.; Erman, M.; Ayman, A.	Sustainable Solutions to Food Insecurity in Nigeria: Perspectives on Irrigation, Crop-Water Productivity, and Antecedents	2023
Armstrong, A.G.; Suk, H.; Mabey, C.S.; Mattson, C.A.; Hall, J.; Salmon, J.L.	Systematic Review and Classification of the Engineering for Global Development Literature Based on Design Tools and Methods for Social Impact Consideration	2023
Ding, H.; Yu, T.; Levin, D.; Warburton, J.; Reytar, K.; Fang, R.; Keifer, H.; Arakwiye, B.; Ngoma, S.	Tackling the challenges of assessing socioeconomic impacts of farmland restoration: The case of Malawi	2023
Asabere, N.Y.; Gyimah, G.K.; Acakpovi, A.; Plockey, F.	Technological innovation driving sustainable entrepreneurial growth in developing nations	2023
Cvetković, V.M.; Tanasić, J.; Ocal, A.; Živković-Šulović, M.; Ćurić, N.; Milojević, S.; Knežević, S.	The Assessment of Public Health Capacities at Local Self-governments in Serbia	2023
Lubchenco, J.; Haugan, P.M.	The Blue Compendium: From Knowledge to Action for a Sustainable Ocean Economy	2023
Ashrafuzzaman, M.; Gomes, C.; Guerra, J.	The Changing Climate Is Changing Safe Drinking Water, Impacting Health: A Case in the Southwestern Coastal Region of Bangladesh (SWCRB)	2023
	The chemistry of fires at the wildland-urban interface	2023
Raihan, A.; Pereira, J.J.; Begum, R.A.; Rasiah, R.	The economic impact of water supply disruption from the Selangor River, Malaysia	2023
Wolfle, A.; Channon, A.A.	The effect of the local environment on child nutritional outcomes: how does seasonality relate to wasting amongst children under 5 in south-west coastal Bangladesh?	2023
Rhue, S.J.; Torrico, G.; Amuzie, C.; Collins, S.M.; Lemaitre, A.; Workman, C.L.; Rosinger, A.Y.; Pearson, A.L.; Piperata, B.A.; Wutich, A.; Brewis, A.; Stoler, J.	The effects of household water insecurity on child health and well-being	2023
Trimmer, J.T.; Qureshi, H.; Otoo, M.; Delaire, C.	The enabling environment for citywide water service provision: Insights from six successful cities	2023
Phillips, C.	The encyclopedia of animal nutrition	2023
Samenjo, K.T.; Oosting, R.M.; Bakker, C.; Diehl, J.C.	The extent to which circular economy principles have been applied in the design of medical devices for low-resource settings in Sub-Saharan Africa. A systematic review	2023
Sarango, M.; Senier, L.; Harlan, S.L.	The high health risks of unaffordable water: An in-depth exploration of pathways from water bill burden to health-related impacts in the United States	2023
Hoque, M.	The impact of floods on the livelihood of rural women farmers and their adaptation strategies: insights from Bangladesh	2023
Landrigan, P.J.; Raps, H.; Cropper, M.; Bald, C.; Brunner, M.; Canonizado, E.M.; Charles, D.; Chiles, T.C.; Donohue, M.J.; Enck, J.; Fénichel, P.; Fleming, L.E.; Ferrier-Pagès, C.; Fordham, R.; Gozt, A.; Griffin, C.; Hahn, M.E.; Haryanto, B.; Hixson, R.; Ianelli, H.; James, B.D.; Kumar, P.; Laborde, A.; Lavender, K.L.; Martin, K.; Mu, J.; Mulders, Y.; Mustapha Olaitan, A.; Niu, J.; Pahl, S.; Park…	The Minderoo-Monaco Commission on Plastics and Human Health	2023
Tulchinsky, T.H.; Varavikova, E.A.; Cohen, M.J.	The New Public Health, Fourth Edition	2023
Hoegh-Guldberg, O.; Caldeira, K.; Chopin, T.; Gaines, S.; Haugan, P.M.; Hemer, M.; Howard, J.; Konar, M.; Krause-Jensen, D.; Lovelock, C.E.; Lindstad, E.; Michelin, M.; Nielsen, F.G.; Northrop, E.; Parker, R.W.R.; Roy, J.; Smith, T.; Some, S.; Tyedmers, P.	The Ocean as a Solution to Climate Change: Five Opportunities for Action	2023
Sanders, D.; de Ceukelaire, W.; Hutton, B.	The struggle for health: Medicine and the politics of underdevelopment	2023
Hlangwani, E.; Mpye, K.L.; Matsuro, L.; Dlamini, B.	The use of technological innovation in bio-based industries to foster growth in the bioeconomy: a South African perspective	2023
Simon, F.; Gironás, J.; Rivera, J.; Vega, A.; Arce, G.; Molinos-Senante, M.; Jorquera, H.; Flamant, G.; Bustamante, W.; Greene, M.; Vargas, I.; Suárez, F.; Pastén, P.; Córtes, S.	Toward sustainability and resilience in Chilean cities: Lessons and recommendations for air, water, and soil issues	2023
Roache, D.A.M.	Transformational Leadership Styles for Global Leaders: Management and Communication Strategies	2023
	Transforming EPA Science to Meet Today's and Tomorrow's Challenges (2023)	2023
Hirwa, H.; Li, F.; Measho, S.; Chen, G.; Muhirwa, F.; Zhang, Q.; Kayiranga, A.; Qiao, Y.; Leng, P.; Tian, C.; Yang, G.; Baranyika, J.B.; Wang, S.; Habimana Simbi, C.H.; Izerimana, E.; Peng, Y.; Ngwijabagabo, H.; Niyonzima, T.	Understanding grain virtual water flux dynamics and drivers from a socio-ecohydrological perspective: A case study of landlocked developing countries of Africa	2023
Nasim, N.; Anthony, S.; Daurewa, T.; Gavidi, S.; Horwitz, P.; Jenkins, A.; Jupiter, S.; Liu, S.; Mailautoka, K.; Mangubhai, S.; Naivalu, K.; Naivalulevu, T.; Naivalulevu, V.; Naucunivanua, S.; Negin, J.; Ravoka, M.; Tukana, A.; Wilson, D.; Thomas, J.	Understanding on-site sanitation in rural Fiji: where definitions of sanitation back-ends differ	2023
Klassert, C.; Yoon, J.; Sigel, K.; Klauer, B.; Talozi, S.; Lachaut, T.; Selby, P.; Knox, S.; Avisse, N.; Tilmant, A.; Harou, J.J.; Mustafa, D.; Medellín-Azuara, J.; Bataineh, B.; Zhang, H.; Gawel, E.; Gorelick, S.M.	Unexpected growth of an illegal water market	2023
Rusca, M.; Savelli, E.; Di Baldassarre, G.; Biza, A.; Messori, G.	Unprecedented droughts are expected to exacerbate urban inequalities in Southern Africa	2023
Vallero, D.A.; Letcher, T.M.	Unraveling Environmental Disasters	2023
Rinfret, S.R.; Pautz, M.C.	US environmental policy in action: Third edition	2023
Bery, S.; Haddad, M.A.	Walking the Talk: Why Cities Adopt Ambitious Climate Action Plans	2023
Geere, J.; Hunter, P.R.; Lankford, B.	Water and health	2023
Fincher, B.; Jepson, W.; Casellas Connors, J.P.	Water insecurity tradeoffs: U.S. drinking water systems during the COVID-19 pandemic	2023
Joshi, N.; Gerlak, A.K.; Hannah, C.; Lopus, S.; Krell, N.; Evans, T.	Water insecurity, housing tenure, and the role of informal water services in Nairobi's slum settlements	2023
Nouri, M.; Homaee, M.; Pereira, L.S.; Bybordi, M.	Water management dilemma in the agricultural sector of Iran: A review focusing on water governance	2023
Bichai, F.; Smeets, P.W.M.H.; Barrette, S.; Deere, D.; Ashbolt, N.J.; Ferrero, G.	Water safety management during the initial phase of the Covid-19 pandemic: challenges, responses and guidance	2023
Jyoti Jain Tholiya, Navendu Chaudhary	Water security: a Geospatial Framework for urban water resilience	2023
Dickson-Gómez, J.; Nyabigambo, A.; Rudd, A.; Ssentongo, J.; Kiconco, A.; Mayega, R.W.	Water, Sanitation, and Hygiene Challenges in Informal Settlements in Kampala, Uganda: A Qualitative Study	2023
Shrestha, A.; Bhattarai, T.N.; Acharya, G.; Timalsina, H.; Marks, S.J.; Uprety, S.; Paudel, S.R.	Water, Sanitation, and Hygiene of Nepal: Status, Challenges, and Opportunities	2023
Karlsen, A.R.; Antonsen, S.	What were we thinking? A scoping review of crisis management pandemic literature (1984–2019)	2023
Etaugh, C.A.; Bridges, J.S.	Women’s Lives: A PSYCHOLOGICAL EXPLORATION, Fifth Edition	2023
Choueiri, Y.; Lund, J.; London, J.K.; Spang, E.S.	(Un)Affordability of Informal Water Systems: Disparities in a Comparative Case Study in Beirut, Lebanon	2022
Apatinga, G.A.; Schuster-Wallace, C.J.; Dickson-Anderson, S.E.	A conceptual framework for gender and climate mainstreaming to mitigate water inaccessibility in rural sub-Saharan Africa	2022
Schmidt, J.I.; Johnson, B.; Huntington, H.P.; Whitney, E.	A framework for assessing food-energy-water security: A FEW case studies from rural Alaska	2022
Lochotzki, H.; Williams, K.P.; Colen, C.G.; Adetona, O.; Tavares, C.B.; Ginn, G.M.; Haynes, R.; Im, W.; Bils, T.; Hood, D.B.	A Framework for Interfacing and Partnering with Environmental Justice Communities as a Prelude to Human Health and Hazard Identification in the Vulnerable Census Tracts of Columbus, Ohio	2022
Cleves-Leguízamo, A.; Youkhana, E.; Toro, J.	A Method to Assess Agroecosystem Resilience to Climate Variability	2022
Hughes, S.	A multidimensional approach to evaluating the vulnerability of drinking water systems	2022
Monge, J.J.; McDonald, N.; McDonald, G.W.	A review of graphical methods to map the natural hazard-to-wellbeing risk chain in a socio-ecological system	2022
Nasim, N.; El-Zein, A.; Thomas, J.	A review of rural and peri-urban sanitation infrastructure in South-East Asia and the Western Pacific: Highlighting regional inequalities and limited data	2022
Abbass, K.; Qasim, M.Z.; Song, H.; Murshed, M.; Mahmood, H.; Younis, I.	A review of the global climate change impacts, adaptation, and sustainable mitigation measures	2022
Maryati, S.; FIRMAN, T.; Humaira, A.N.S.	A sustainability assessment of decentralized water supply systems in Bandung City, Indonesia	2022
Mehdipour, S.; Nakhaei, N.; Zolala, F.; Okhovaty, M.; Foroud, A.; Haghdoost, A.A.	A systematized review exploring the map of publications on the health impacts of drought	2022
Anderson, D.M.; Birken, S.A.; Bartram, J.K.; Freeman, M.C.	Adaptation of Water, Sanitation, and Hygiene Interventions: A Model and Scoping Review of Key Concepts and Tools	2022
Gandidzanwa, C.P.; Togo, M.	Adaptive Responses to Water, Energy, and Food Challenges and Implications on the Environment: An Exploratory Study of Harare	2022
Costanza, R.	Addicted to growth: Societal therapy for a sustainable wellbeing future	2022
Emile, R.; Clammer, J.R.; Jayaswal, P.; Sharma, P.	Addressing water scarcity in developing country contexts: a socio-cultural approach	2022
Fernhaber, S.A.; Zou, H.	Advancing societal grand challenge research at the interface of entrepreneurship and international business: A review and research agenda	2022
Anuradha, B.; Shanmugam, S.; Sanjay, N.; Vivekananthan, V.	An Analytical Study for Assessing Water Productivity in Pre- and Post-Rehabilitation Period of Rural Tank System	2022
Mukherjee, S.; Sundberg, T.; Sikdar, P.K.; Schütt, B.	An Integrated Quantitative Assessment of Urban Water Security of a Megacity in the Global South	2022
Datta, S.; Karmakar, S.; Islam, M.N.; Karim, M.E.; Kabir, M.H.; Uddin, J.	Assessing landcover and water uses effects on water quality in a rapidly developing semi-urban coastal area of Bangladesh	2022
Nijhawan, A.; Howard, G.; Poudel, M.; Pregnolato, M.; Eunice Lo, Y.T.E.; Ghimire, A.; Baidya, M.; Geremew, A.; Flint, A.; Mulugeta, Y.	Assessing the Climate Resilience of Community‐Managed Water Supplies in Ethiopia and Nepal	2022
Moheimani, A.; Sheikh, R.; Hosseini, S.M.H.; Sana, S.S.	Assessing the preparedness of hospitals facing disasters using the rough set theory: guidelines for more preparedness to cope with the COVID-19	2022
Ahmed, A.; Valyrakis, M.; Ghumman, A.R.; Arshad, M.; Pasha, G.A.; Farooq, R.; Janjua, S.	Assessing the Rainfall Water Harvesting Potential Using Geographical Information Systems (GIS)	2022
Nounkeu, C.D.; Metapi, Y.D.; Ouabo, F.K.; Kamguem, A.S.T.; Nono, B.; Azza, N.; Leumeni, P.; Nguefack-Tsague, G.; Todem, D.; Dharod, J.M.; Kuate, D.	Assessment of drinking water access and household water insecurity: A cross sectional study in three rural communities of the Menoua division, West Cameroon	2022
Tecklie, A.; Yosef, B.	Assessment of Major Wetlands' Current Situation and Their Contribution to Livelihood Improvement, South Wollo, Ethiopia	2022
Hoang, T.-K.-D.; Binh, Q.-A.; Bui, X.-T.; Le, T.-H.; Dang, B.-T.; Nguyen, H.-H.; Ngo, T.-T.-M.; Kohler, P.; Makohliso, S.; Maryna, P.; Raab, M.; Vanobberghen, A.; Hayter, A.; Schönenberger, K.	Assessment of water, sanitation, and hygiene services in district health care facilities in rural area of Mekong Delta, Vietnam	2022
Nijhawan, A.; Howard, G.	Associations between climate variables and water quality in low- and middle-income countries: A scoping review	2022
Singh, S.; Jayaram, R.	Attainment of water and sanitation goals: a review and agenda for research	2022
Alazaiza Motasem, M.Y.D.; Albahnasawi, A.; Al Maskari, T.; Nassani, D.E.	Benefits, challenges and success factors of water safety plan implementation: A review	2022
Lawrence, R.A.; Lawrence, R.M.	Breastfeeding: A Guide for the Medical Profession	2022
Evenseth, L.L.; Sydnes, M.; Gausdal, A.H.	Building Organizational Resilience Through Organizational Learning: A Systematic Review	2022
Ciampi, L.; Plumpton, H.J.; Osbahr, H.; Cornforth, R.J.; Petty, C.	Building resilience through improving groundwater management for sustainable agricultural intensification in African Sahel	2022
Zozmann, H.; Morgan, A.; Klassert, C.; Klauer, B.; Gawel, E.	Can Tanker Water Services Contribute to Sustainable Access to Water? A Systematic Review of Case Studies in Urban Areas	2022
Wise, R.M.; Alsan, B.; Taleb, E.	Career Satisfaction and Adult Attachment Style Among Working Adults: Evidence from Turkey	2022
Ashley, R.; Horton, B.	Characterizing financing needs and financing capacities in different regions: a global perspective on water-related financing flows and drivers for investment needs	2022
Saarinen, J.; Fitchett, J.; Hoogendoorn, G.	Climate Change and Tourism in Southern Africa	2022
Tiwari, I.; Tilstra, M.; Campbell, S.M.; Nielsen, C.C.; Hodgins, S.; Osornio-Vargas, A.R.; Whitfield, K.; Sapkota, B.P.; Yamamoto, S.S.	Climate change impacts on the health of South Asian children and women subpopulations - A scoping review	2022
Hyde-Smith, L.; Zhan, Z.; Roelich, K.; Mdee, A.; Evans, B.	Climate Change Impacts on Urban Sanitation: A Systematic Review and Failure Mode Analysis	2022
Ouda, S.; Zohry, A.E.-H.	Climate-Smart Agriculture: Reducing Food Insecurity	2022
Buckley, G.J.; Palmer, G.H.	COMBATING ANTIMICROBIAL RESISTANCE AND PROTECTING THE MIRACLE OF MODERN MEDICINE	2022
Sušnik, J.; Jussah, O.; Orabi, M.O.M.; Abubakar, M.C.; Quansah, R.F.; Yahaya, W.; Adonadaga, J.A.; Cossa, C.; Ferrato, J.; Cossa, C.A.; Hadi, W.; Yuniarto, A.; Marsono, B.D.; Purnomo, A.; Bichai, F.; Zevenbergen, C.	Comparative assessment of alternative water supply contributions across five data-scarce cities	2022
Sharifi, A.; Allam, Z.	Contributions of smart technologies to disaster resilience	2022
Ryan, J.M.; Nanda, S.	COVID-19: Social Inequalities and Human Possibilities	2022
Hurst, W.; Bennin, K.E.; Kotze, B.; Mangara, T.	Critical Infrastructures: Reliability, Resilience and Wastage	2022
Gwenzi, W.	Dangerous liaisons? As the COVID-19 wave hits Africa with potential for novel transmission dynamics: a perspective	2022
Mirzabaev, A.; Wu, J.; Evans, J.; García-Oliva, F.; Hussein, I.A.G.; Iqbal, M.M.; Kimutai, J.; Knowles, T.; Meza, F.J.; Nedjraoui, D.; Tena, F.; Türkeş, M.; Vázquez, R.J.; Weltz, M.A.; Almazroui, M.; Aloui, H.; El-Askary, H.; Awan, A.R.; Bellard, C.; Burrell, A.; van der Esch, S.; Hetem, R.; Hermans, K.; Hurlbert, M.; Krishnaswamy, J.; Kubik, Z.; Kust, G.; Lüdeling, E.; Meijer, J.; Mohammed, A.; …	Desertification	2022
Mariniello, M.	Digital economic policy: The economics of digital markets from a European Union perspective	2022
Triantafyllidou, E.; Zabaniotou, A.	Digital Technology and Social Innovation Promoting a Green Citizenship: Development of the “Go Sustainable Living” Digital Application	2022
Chumky, T.; Basu, M.; Onitsuka, K.; Parvin, G.A.; Hoshino, S.	Disaster-induced migration types and patterns, drivers, and impact: A union-level study in Bangladesh	2022
Sharma, V.; Singh, A.; Rai, S.S.	Disruptions in sourcing and distribution practices of supply chains due to COVID-19 pandemic: a sustainability paradigm	2022
Ho, T.D.N.; Tsusaka, T.W.; Kuwornu, J.K.M.; Datta, A.; Nguyen, L.T.	Do rice varieties matter? Climate change adaptation and livelihood diversification among rural smallholder households in the Mekong Delta region of Vietnam	2022
Falk, J.; Globisch, B.; Angelmahr, M.; Schade, W.; Schenk-Mathes, H.	Drinking Water Supply in Rural Africa Based on a Mini-Grid Energy System—A Socio-Economic Case Study for Rural Development	2022
Abrokwah, S.; Ekumah, B.; Adade, R.; Akuoko, I.S.G.	Drivers of single-use plastic waste generation: lessons from packaged water consumers in Ghana	2022
Petersen-Perlman, J.D.; Aguilar-Barajas, I.; Megdal, S.B.	Drought and groundwater management: Interconnections, challenges, and policyresponses	2022
Kumar, A.	Ecosystem-Based Adaptation: Approaches to Sustainable Management of Aquatic Resources	2022
Katekar, V.; Deshmukh, S.	Electrification and energy transition in Sub-Saharan Africa: Status, issues and effects, from a source-to-household perspective	2022
Amuah, E.E.; Boadu, J.A.; Nandomah, S.	Emerging issues and approaches to protecting and sustaining surface and groundwater resources: Emphasis on Ghana	2022
Küfeoǧlu, S.	Emerging Technologies: Value Creation for Sustainable Development	2022
Marcantonio, R.A.	ENVIRONMENTAL VIOLENCE: In the Earth System and the Human Niche	2022
Sianipar, C.P.M.	Environmentally-appropriate technology under lack of resources and knowledge: Solar-powered cocoa dryer in rural Nias, Indonesia	2022
Fallon Grasham, C.F.; Hoque, S.F.; Korzenevica, M.; Fuente, D.; Goyol, K.; Verstraete, L.; Mueze, K.; Tsadik, M.; Zeleke, G.; J. Charles, K.J.	Equitable urban water security: beyond connections on premises	2022
Randeniya, A.; Radhakrishnan, M.; Sirisena, T.A.J.G.; Maish, I.; Pathirana, A.	Equity - performance trade-off in water rationing regimes with domestic storage	2022
Chaitkin, M.; McCormick, S.; Álvarez-Sala Torreano, J.; Amongin, I.; Gaya, S.; Hanssen, O.N.; Johnston, R.; Slaymaker, T.; Chase, C.; Hutton, G.; Montgomery, M.	Estimating the cost of achieving basic water, sanitation, hygiene, and waste management services in public health-care facilities in the 46 UN designated least-developed countries: a modelling study	2022
Rasva, M.; Jürgenson, E.	Europe’s Large-Scale Land Acquisitions and Bibliometric Analysis	2022
Hasan, M.A.; Irfanullah, H.M.	Exploring the potential for rainwater use for the urban poor in Bangladesh	2022
Nkiaka, E.	Exploring the socioeconomic determinants of water security in developing regions	2022
Clarke, B.; Otto, F.; Stuart-Smith, R.; Harrington, L.	Extreme weather impacts of climate change: an attribution perspective	2022
Shahzad, M.A.; Razzaq, A.; Qing, P.; Rizwan, M.; Faisal, M.	Food availability and shopping channels during the disasters: Has the COVID-19 pandemic changed peoples’ online food purchasing behavior?	2022
Marinova, D.; Bogueva, D.	Food in a Planetary Emergency	2022
Raj, S.; Roodbar, S.; Brinkley, C.; Wolfe, D.W.	Food Security and Climate Change: Differences in Impacts and Adaptation Strategies for Rural Communities in the Global South and North	2022
Workman, C.L.; Stoler, J.; Harris, A.; Ercümen, A.; Kearns, J.; Mapunda, K.M.	Food, water, and sanitation insecurities: Complex linkages and implications for achieving WASH security	2022
Ma, Z.; Hu, C.; Huang, J.; Li, T.; Lei, J.	Forests and Forestry in Support of Sustainable Development Goals (SDGs): A Bibliometric Analysis	2022
	GLOBAL HEALTH WATCH 6: IN THE SHADOW OF THE PANDEMIC	2022
Castro, G.B.; Bernegossi, A.C.; Sousa, B.J.D.O.; de Lima e Silva, M.R.; Silva, F.R.D.; Freitas, B.L.S.; Ogura, A.P.; Corbi, J.J.	Global occurrence of SARS-CoV-2 in environmental aquatic matrices and its implications for sanitation and vulnerabilities in Brazil and developing countries	2022
Masson-Delmotte, V.; Pörtner, H.-O.; Skea, J.; Zhai, P.; Roberts, D.; Shukla, P.R.; Pirani, A.; Moufouma-Okia, W.; Péan, C.; Pidcock, R.; Connors, S.; Matthews, J.B.R.; Chen, Y.; Zhou, X.; Gomis, M.I.; Lonnoy, E.; Maycock, T.; Tignor, M.; Waterfield, T.	Global warming of 1.5°C: An IPCC Special Report on the impacts of global warming of 1.5°C above pre-industrial levels and related global greenhouse gas emission pathways, in the context of strengthening the global response to the threat of climate change, sustainable development, and efforts to eradicate poverty	2022
Nath, B.D.; Schuster-Wallace, C.J.; Dickson-Anderson, S.E.	Headwater-to-consumer Drinking Water Security Assessment Framework and Associated Indicators for Small Communities in High-income Countries	2022
Kasule, J.	Historical Dictionary of Uganda, Second Edition	2022
Rogers, A.T.	Human Behavior in the Social Environment: Perspectives on Development and the Life Course, Sixth Edition	2022
Silva, K.J.; Leite, L.; Daniel, L.A.; Sabogal-Paz, L.P.	Hydrogen peroxide-assisted pasteurization: An alternative for household water disinfection	2022
Nyenje, P.M.; Ocoromac, D.; Tumwesige, S.; Ascott, M.J.; Sorensen, J.P.R.; Newell, A.J.; MacDonald, D.M.J.; Gooddy, D.C.; Tindimugaya, C.; Kulabako, R.; Lapworth, D.J.; Foppen, J.W.	Hydrogeology of an urban weathered basement aquifer in Kampala, Uganda; 乌干达坎帕拉城市风化基岩含水层的水文地质; Hydrogéologie d’un aquifère de socle altéré en contexte urbain à Kampala, Ouganda; Hidrogeologia de um aquífero urbano de embasamento alterado em Kampala, Uganda; Hidrogeología de un acuífero urbano en un basamento meteorizado en Kampala, Uganda	2022
Tong, Y.; Fan, L.; Niu, H.	Identification of pathways that lead to continuous or intermittent water supply by conducting a qualitative comparative analysis of rural water utilities in China	2022
Ray, M.; Chakraborty, B.	Impact of demand flexibility and tiered resilience on solar photovoltaic adoption in humanitarian settlements	2022
Sojobi, A.O.; Zayed, T.	Impact of sewer overflow on public health: A comprehensive scientometric analysis and systematic review	2022
Thakur, B.K.; Gupta, V.; Bhattacharya, P.; Chakraborty, T.	Impact of socioeconomic factors on households’ willingness to pay for arsenic-free safe drinking water - A case study of Bihar, India	2022
Silva Rodríguez de San Miguel, J.A.	Implementation and Integration of Sustainability in the Water Industry: A Systematic Literature Review	2022
Hoffman, R.	Implementing the Mediterranean Diet: Nutrition in Practice and Public Health	2022
Berendes, D.; Martinsen, A.; Lozier, M.; Rajasingham, A.; Medley, A.; Osborne, T.; Trinies, V.; Schweitzer, R.; Prentice-Mott, G.; Pratt, C.; Murphy, J.; Craig, C.; Lamorde, M.; Kesande, M.; Tusabe, F.; Mwaki, A.; Eleveld, A.; Odhiambo, A.; Ngere, I.; Njenga, M.K.; Cordón-Rosales, C.; Contreras, A.P.G.; Call, D.; Ramay, B.M.; Ramm, R.E.S.; Paulino, C.J.T.; Schnorr, C.D.; De, M.; Dumas, D.; Murray…	Improving water, sanitation, and hygiene (WASH), with a focus on hand hygiene, globally for community mitigation of COVID-19	2022
Dwipayanti, N.M.U.; Nastiti, A.; Johnson, H.; Loehr, J.; Kowara, M.; Rozari, P.; Vada, S.; Hadwen, W.; Nugraha, M.A.T.; Powell, B.	Inclusive WASH and sustainable tourism in Labuan Bajo, Indonesia: needs and opportunities	2022
J. Charles, K.J.; Howard, G.; Prats, E.; Gruber, J.; Alam, S.; Alamgir, A.S.M.; Baidya, M.; Flora, M.S.; Haque, F.; Hassan, S.M.Q.; Islam, S.; Lazaro, A.; Lwetoijera, D.W.; Mahmud, S.G.; Mahmud, Z.H.; Matwewe, F.; Pasa, K.; Rahman, M.; Reza, A.A.S.; Selimuzzaman, M.; Sharif, A.R.; Sharma, S.; Thomas, J.; Campbell-Lendrum, D.	Infrastructure alone cannot ensure resilience to weather events in drinking water supplies	2022
Schowalter, T.D.	Insect Ecology: An Ecosystem Approach	2022
Sani, Y.; Scholz, M.	Interplay of Water-Energy Security and Food Consumption Patterns towards Achieving Nutrition Security in Katsina State, North-Western Nigeria	2022
Prain, G.; Simon, D.; Halliday, J.; Drechsel, P.	Investment priorities for research and innovation in urban agri-food systems: Toward more resilient cities in the Global South	2022
Fattah, M.A.; Rimi, R.A.; Morshed, S.R.	Knowledge, behavior, and drivers of residents’ willingness to pay for a sustainable solid waste collection and management system in Mymensingh City, Bangladesh	2022
Olsson, L.; Barbosa, H.; Bhadwal, S.; Cowie, A.; Delusca, K.; Flores-Rentería, D.; Hermans, K.; Jobbágy, E.; Kurz, W.; Li, D.; Sonwa, D.J.; Stringer, L.; Crews, T.; Dallimer, M.; Eekhout, J.; Erb, K.; Haughey, E.; HOUGHTON, R.; Iqbal, M.M.; Johnson, F.X.; Lee, W.-K.; Morton, J.; Oliva, F.G.; Petzold, J.; Rahimi, M.; Renou-Wilson, F.; Tengberg, A.; Verchot, L.; Vincent, K.; Moreno, J.M.; Vera, C.;…	Land degradation	2022
Li, T.; Cai, S.; Singh, R.K.; Cui, L.; Fava, F.; Tang, L.; Xu, Z.; Li, C.; Cui, X.; Du, J.; Hao, Y.; Liu, Y.; Wang, Y.	Livelihood resilience in pastoral communities: Methodological and field insights from Qinghai-Tibetan Plateau	2022
Eshwer Kale, Marcella D'Souza, Sarita Chemburkar	Making the invisible, visible: 3D aquifer models as an effective tool for building water stewardship in Maharashtra, India	2022
Nahalomo, A.; Iversen, P.O.; Andreassen, B.A.; Kaaya, A.N.; Rukooko, A.B.; Tushabe, G.; Nateme, N.C.; Rukundo, P.M.	Malnutrition and Associated Risk Factors among Children 6-59 Months Old in the Landslide-Prone Bududa District, Eastern Uganda: A Cohort Study	2022
Eduful, M.; Alsharif, K.; Acheampong, M.; Nkhoma, P.	Management of catchment for the protection of source water in the Densu River basin, Ghana: implications for rural communities	2022
Zyoud, S.	Mapping and Visualizing Global Knowledge on Intermittent Water Supply Systems	2022
Wun, J.; Kemp, C.; Puett, C.; Bushnell, D.; Crocker, J.; Levin, C.	Measurement of benefits in economic evaluations of nutrition interventions in low- and middle-income countries: A systematic review	2022
Liu, S.; Gao, S.; Hsu, W.-L.; Shiau, Y.-C.; Liu, H.-L.	Mechanism study on the impact of china population structure change on the water use of the three main industries	2022
Wells, E.C.; Vidmar, A.M.; Webb, W.A.; Ferguson, A.C.; Verbyla, M.E.; de los Reyes, F.L.; Zhang, Q.; Mihelcic, J.R.	Meeting the Water and Sanitation Challenges of Underbounded Communities in the U.S.	2022
Kligerman, D.C.; de Oliveira Cardoso, T.A.D.O.; Cohen, S.C.; Azevedo, D.C.B.D.; Toledo, G.D.A.; Azevedo, A.P.C.B.D.; Charlesworth, S.M.	Methodology for a Comprehensive Health Impact Assessment in Water Supply and Sanitation Programmes for Brazil	2022
Langhans, K.E.; Schmitt, R.J.P.; Chaplin-Kramer, R.; Anderson, C.B.; Vargas-Bolaños, C.; Vargas Cabezas, F.; Dirzo, R.; Goldstein, J.A.; Horangic, T.; Miller-Granados, C.; Powell, T.M.; Smith, J.R.; Alvarado-Quesada, I.; Umaña Quesada, A.; Monge Vargas, R.; Wolny, S.; Daily, G.C.	Modeling multiple ecosystem services and beneficiaries of riparian reforestation in Costa Rica	2022
Nicolas-Artero Chloé, Blanco Gustavo, Bopp Carlos, Carrasco Noelia	Modes of access to water for domestic use in rural Chile: a typological proposal	2022
Pereira, P.; Inácio, M.; Karnauskaitė, D.; Bogdzevič, K.; Gomes, E.; Kalinauskas, M.; Barceló, D.	Nature-Based Solutions Impact on Urban Environment Chemistry: Air, Soil, and Water	2022
Ward, N.	NET ZERO, FOOD AND FARMING: Climate Change and the UK Agri-Food System	2022
	New Directions for CHEMICAL ENGINEERING	2022
Goswami, P.; Guruge, K.S.; Tanoue, R.; Tamamura, Y.A.; Jinadasa, K.B.S.N.; Nomiyama, K.; Kunisue, T.; Tanabe, S.	Occurrence of Pharmaceutically Active Compounds and Potential Ecological Risks in Wastewater from Hospitals and Receiving Waters in Sri Lanka	2022
Midega, C.A.O.	Opportunities for circular bionutrient economy in Kenya: Sanitation and waste stream characterization	2022
Nelson, S.; Thomas, J.; Jenkins, A.; Naivalu, K.; Naivalulevu, T.; Naivalulevu, V.; Mailautoka, K.; Anthony, S.; Ravoka, M.; Jupiter, S.; Mangubhai, S.; Horwitz, P.; Abimbola, S.; Negin, J.	Perceptions of drinking water access and quality in rural indigenous villages in Fiji	2022
Peschard, I.; Benétreau-Dupin, Y.; Wessels, C.	Philosophy and Science of Risk: An Introduction	2022
Mihai, F.-C.; Gündoǧdu, S.; Markley, L.A.; Olivelli, A.; Khan, F.R.; Gwinnett, C.; Gutberlet, J.; Reyna-Bensusan, N.; Llanquileo-Melgarejo, P.; Meidiana, C.; Elagroudy, S.; Ishchenko, V.; Penney, S.; Lenkiewicz, Z.; Molinos-Senante, M.	Plastic Pollution, Waste Management Issues, and Circular Economy Opportunities in Rural Communities	2022
Kusi-Appiah, A.; Mkandawire, P.	Political ecology of household water security among the urban poor in Malawi	2022
Nölke, A.	Post-corona capitalism: The alternatives ahead	2022
Thoms, A.; Köster, S.	Potentials for Sponge City Implementation in Sub-Saharan Africa	2022
Sarker, U.; Lin, Y.-P.; Oba, S.; Yoshioka, Y.; Hoshikawa, K.	Prospects and potentials of underutilized leafy Amaranths as vegetable use for health-promotion	2022
Gunter, B.	Psychological insights on the role and impact of the media during the pandemic: Lessons from COVID-19	2022
Qiyang, L.	Public Acceptability of Congestion Charging in China	2022
Li, Y.; Trimmer, J.T.; Hand, S.; Zhang, X.; Chambers, K.G.; Lohman, H.A.C.; Shi, R.; Byrne, D.M.; Cook, S.M.; Guest, J.S.	Quantitative sustainable design (QSD) for the prioritization of research, development, and deployment of technologies: a tutorial and review	2022
Hurlbert, M.; Krishnaswamy, J.; Davin, E.; Johnson, F.X.; Mena, C.F.; Morton, J.; Myeong, S.; Viner, D.; Warner, K.; Wreford, A.; Zakieldeen, S.; Zommers, Z.; Bailis, R.; Baptiste, B.; Bowman, K.; Byers, E.; Calvin, K.; Díaz-Chavez, R.; Evans, J.; Fletcher, A.; Ford, J.; Grant, S.P.; Mahadevia, D.; Manialawy, Y.; McElwee, P.; Pathak, M.; Quan, J.; Rajagopalan, B.; Renwick, A.; Rodriguez-Morales, …	Risk management and decision-making in relation to sustainable development	2022
Chabba, M.; Bhat, M.G.; Sarmiento, J.P.	Risk-based benefit-cost analysis of ecosystem-based disaster risk reduction with considerations of co-benefits, equity, and sustainability	2022
Moulds, S.; Chan, A.C.H.; Tetteh, J.D.; Bixby, H.R.; Owusu, G.; Agyei-Mensah, S.; Ezzati, M.; Buytaert, W.; Templeton, M.R.	Sachet water in Ghana: A spatiotemporal analysis of the recent upward trend in consumption and its relationship with changing household characteristics, 2010–2017	2022
Barnett, M.L.; Henriques, I.; Husted, B.W.	Salvaging Corporate Sustainability: Going Beyond the Business Case	2022
Anand, U.; Li, X.; Sunita, K.; Lokhandwala, S.; Gautam, P.; Suresh, S.; Sarma, H.; Balachandar, B.; Dey, A.; Bontempi, E.; Jiang, G.	SARS-CoV-2 and other pathogens in municipal wastewater, landfill leachate, and solid waste: A review about virus surveillance, infectivity, and inactivation	2022
Rossi, S.	SDG 14: Life below water: A machine-generated overview of recent literature	2022
Solis, M.; Bashar, S.B.	Social equity implications of advanced water metering infrastructure	2022
Perera, C.H.; Nayak, R.; Thang Nguyen, L.V.	Social Media Marketing and Customer-Based Brand Equity for Higher Educational Institutions: Case of Vietnam and Sri Lanka	2022
Varela Pérez, P.; Greiner, B.E.; Von Cossel, M.	Socio-Economic and Environmental Implications of Bioenergy Crop Cultivation on Marginal African Drylands and Key Principles for a Sustainable Development	2022
Barrett, C.B.; Benton, T.; Fanzo, J.; Herrero, M.; Nelson, R.J.; Bageant, E.; Buckler, E.; Cooper, K.; Culotta, I.; Fan, S.; Gandhi, R.; James, S.; Kahn, M.; Lawson-Lartego, L.; Liu, J.; Marshall, Q.; Mason-D’Croz, D.; Mathys, A.; Mathys, C.; Mazariegos-Anastassiou, V.; Miller, A.; Misra, K.; Mude, A.; Shen, J.; Sibanda, L.M.; Song, C.; Steiner, R.; Thornton, P.; Wood, S.	Socio-Technical Innovation Bundles for Agri-Food Systems Transformation	2022
Surachman, E.N.; Perwitasari, S.W.; Suhendra, M.	Stakeholder management mapping to improve public-private partnership success in emerging country water projects: Indonesia's experience	2022
Sarkar, S.K.	Sundarban Mangrove Wetland (A UNESCO World Heritage Site): A Comprehensive Global Treatise	2022
Libey, A.; Kebede, A.; Ibrahim, J.; Hutchings, P.; Mekonta, L.; Butterworth, J.; Thomas, E.	Surveyed from Afar: Household water security, emotional well-being, and the reliability of water supply in the Ethiopian lowlands	2022
Shahady, T.	Sustainable water management with a focus on climate change	2022
Bano, R.; Khiadani, M.; Nyam, Y.S.	System Archetypes Underlying Formal-Informal Urban Water Supply Dynamics	2022
Armstrong, A.G.; Suk, H.; Mabey, C.S.; Mattson, C.A.; Hall, J.; Salmon, J.L.	SYSTEMATIC REVIEW AND CLASSIFICATION OF THE ENGINEERING FOR GLOBAL DEVELOPMENT LITERATURE BASED ON DESIGN TOOLS AND METHODS FOR SOCIAL IMPACT CONSIDERATION	2022
Ngasala, T.M.; Masten, S.J.; Gasteyer, S.P.	System-wide approaches to mitigate environmental and health impacts of water contamination	2022
Padhani, Z.A.; Das, J.K.; Akhtar, S.; Ismail, T.; Bhutta, Z.A.	Tackling Protein-Calorie Malnutrition during World Crises	2022
Hoehnel, A.; Zannini, E.; Arendt, E.K.	Targeted formulation of plant-based protein-foods: Supporting the food system's transformation in the context of human health, environmental sustainability and consumer trends	2022
Macdonald, D.W.; Newman, C.	The badgers of Wytham woods: A model for behaviour, ecology, and evolution	2022
Bachmann, N.; Tripathi, S.; Brunner, M.; Jodlbauer, H.	The Contribution of Data-Driven Technologies in Achieving the Sustainable Development Goals	2022
Puthalpet, J.R.	The Daunting Climate Change: Science, Impacts, Adaptation & Mitigation Strategies, Policy Responses	2022
Ibrahim, S.	The effects of COVID-19 on the water sector	2022
Feldman, D.L.	The Governance of Water Innovations	2022
Heller, L.	The Human Rights to Water and Sanitation	2022
Li, F.; Yang, P.; Zhang, K.; Yin, Y.; Zhang, Y.; Yin, C.	The influence of smartphone use on conservation agricultural practice: Evidence from the extension of rice-green manure rotation system in China	2022
Wells, E.C.; Whiteford, L.M.	The Medical Anthropology of Water and Sanitation	2022
Suazo, A.E.	The Risk of Water Conflicts in Aotearoa-New Zealand: Emergence and Intensification	2022
Ahmed, K.; Mohiuddin, H.	The Rohingya Crisis and the Two-Faced God of Janus: What Lies Ahead	2022
Stoler, J.; Pearson, A.L.; Rosinger, A.Y.; Lee, A.E.; Bombardi, R.; Brewis, A.; Keough, S.B.; López-Carr, D.; Shrader, C.-H.; Stauber, C.E.; Stevenson, E.G.J.; Sullivan, A.; Tutu, R.A.	The role of water in environmental migration	2022
Ringler, C.; Agbonlahor, M.; Barron, J.; Baye, K.; Meenakshi, J.V.; Mekonnen, D.K.; Uhlenbrook, S.	The role of water in transforming food systems	2022
Huang, W.; Chen, S.; Zhang, X.; Zhao, X.	The Sustainable Development of Forest Food	2022
Caat, P.N.; Tenpierik, M.J.; Sanyal, T.; Tillie, N.M.J.D.; van den Dobbelsteen, A.A.J.F.; Thün, G.; Cullen, S.; Nakayama, S.; Karanisa, T.; Monti, S.	Towards fossil free cities – Emission assessment of food and resources consumption with the FEWprint carbon accounting platform	2022
Farooq, M.S.; Uzair, M.; Raza, A.; Habib, M.; Xu, Y.; Yousuf, M.; Yang, S.H.; Khan, M.	Uncovering the Research Gaps to Alleviate the Negative Impacts of Climate Change on Food Security: A Review	2022
Almulhim, A.I.; Aina, Y.A.	Understanding Household Water-Use Behavior and Consumption Patterns during COVID-19 Lockdown in Saudi Arabia	2022
Leal Filho, W.; Totin, E.; Franke, J.A.; Andrew, S.M.; Abubakar, I.R.; Azadi, H.; Nunn, P.D.; Ouweneel, B.; Williams, P.A.; Simpson, N.P.	Understanding responses to climate-related water scarcity in Africa	2022
Sunny, F.A.; Karimanzira, T.T.P.; Peng, W.; Rahman, M.S.; Huang, H.	Understanding the determinants and impact of the adoption of technologies for sustainable farming systems in water-scarce areas of Bangladesh	2022
Anido, R.; Daniel, J.	Urban food systems and their governance: A viable alternative for Venezuela in the UN sustainable food systems framework?; Les systèmes alimentaires urbains et leur gouvernance, une alternative viable pour le Venezuela dans le cadre des systèmes agroalimentaires durables?; Sistemas alimentares urbanos e sua governançã, uma alternativa viável para a Venezuela no quadro dos sistemas agro-alimentare…	2022
Xie, J.Z.; Demmler, K.M.; Trevenen-Jones, A.; Brownell, K.D.	Urban Public Food Procurement in Kiambu and Machakos Counties as a Driver of Food and Nutrition Security and Sustainability: A Literature Review and Case Studies	2022
Foster, S.; Hirata, R.; Eichholz, M.; Alam, M.-F.	Urban Self-Supply from Groundwater—An Analysis of Management Aspects and Policy Needs	2022
Keddy, K.H.; Saha, S.; Kariuki, S.; Kalule, J.B.; Qamar, F.N.; Haq, Z.; Okeke, I.N.	Using big data and mobile health to manage diarrhoeal disease in children in low-income and middle-income countries: societal barriers and ethical implications	2022
Fonseca, K.; Espitia, E.; Breuer, L.; Correa, A.	Using fuzzy cognitive maps to promote nature-based solutions for water quality improvement in developing-country communities	2022
Nath, S.; Madhoo, Y.N.	Vanishing Borders of Urban Local Finance: Global Developments with Illustrations from Indian Federation	2022
Chen, K.; Lin, X.; Wang, H.; Qiang, Y.; Kong, J.; Huang, R.; Wang, H.; Liu, H.	Visualizing the Knowledge Base and Research Hotspot of Public Health Emergency Management: A Science Mapping Analysis-Based Study	2022
Younas, H.; Younas, F.	Wastewater Application in Agriculture-A Review	2022
Ghangrekar, M.M.	Wastewater to water: Principles, technologies and engineering design	2022
Gwenzi, W.	Wastewater, waste, and water-based epidemiology (WWW-BE): A novel hypothesis and decision-support tool to unravel COVID-19 in low-income settings?	2022
Pond, K.; Bond, T.	Water and environmental health	2022
Rodríguez, C.; García, B.; Pinto, C.; Sánchez, R.; Serrano, J.; Leiva, E.	Water Context in Latin America and the Caribbean: Distribution, Regulations and Prospects for Water Reuse and Reclamation	2022
Wutich, A.; Jepson, W.; Velasco, C.; Roque, A.; Gu, Z.; Hanemann, M.; Hossain, M.J.; Landes, L.; Larson, R.; Li, W.W.; Morales, O.; Patwoary, N.; Porter, S.; Tsai, Y.-S.; Zheng, M.; Westerhoff, P.	Water insecurity in the Global North: A review of experiences in U.S. colonias communities along the Mexico border	2022
Caruso, B.A.; Conrad, A.; Patrick, M.; Owens, A.; Kviten, K.; Zarella, O.; Rogers, H.; Sinharoy, S.S.	Water, sanitation, and women’s empowerment: A systematic review and qualitative metasynthesis	2022
Ajmal, U.; Jamal, S.; Ahmad, W.S.; Ali, M.A.; Ali, M.B.	Waterborne diseases vulnerability analysis using fuzzy analytic hierarchy process: a case study of Azamgarh city, India	2022
Gooding, M.J.; Shewry, P.R.	Wheat: Environment, Food and Health	2022
Gregg, H.R.; Restubog, S.L.; Dasborough, M.; Xu, C.; Deen, C.M.; He, Y.	When Disaster Strikes! An Interdisciplinary Review of Disasters and Their Organizational Consequences	2022
Shen, C.; Wei, M.; Sheng, Y.	A bibliometric analysis of food safety governance research from 1999 to 2019	2021
Jepson, W.E.; Tomaz, P.; Santos, J.O.; Baek, J.	A comparative analysis of urban and rural household water insecurity experiences during the 2011–17 drought in Ceará, Brazil	2021
Zheng, X.; Zhang, G.; Li, J.; Liu, L.; Zhang, X.; Pan, X.	A factorial emission-focused general equilibrium model for investigating composite effects of multiple environmental policies	2021
Wutich, A.; Jepson, W.E.; Stoler, J.; Thomson, P.; Kooy, M.; Brewis, A.; Staddon, C.; Meehan, K.	A Global Agenda for Household Water Security: Measurement, Monitoring, and Management	2021
Navarro, F.A.R.; Gesualdo, G.C.; Ferreira, R.G.; Rapalo, L.M.C.; Benso, M.R.; de MacEdo, M.B.; Mendiondo, E.M.	A novel multistage risk management applied to water-related disaster using diversity of measures: A theoretical approach	2021
Sharan, A.; Lal, A.; Datta, B.	A review of groundwater sustainability crisis in the Pacific Island countries: Challenges and solutions	2021
Marçal, J.; Antízar-Ladislao, B.; Hofman, J.	Addressing water security: An overview	2021
Decouttere, C.; de Boeck, K.; Vandaele, N.	Advancing sustainable development goals through immunization: a literature review	2021
Hameed, R.; Javed, M.; Nawaz, M.S.	An assessment of adoption of rainwater harvesting system in residential buildings in Lahore, Pakistan	2021
Ahlström, H.; Hileman, J.; Wang-Erlandsson, L.; Mancilla García, M.M.; Moore, M.-L.; Jonas, K.; Pranindita, A.; Kuiper, J.J.; Fetzer, I.; Jaramillo, F.; Svedin, U.	An Earth system law perspective on governing social-hydrological systems in the Anthropocene	2021
Garrick, D.E.; Hahn, R.W.	An economic perspective on water security	2021
Mubialiwo, A.; Awass, A.; Onyutha, C.	Analyses of community willingness-to-pay and the influencing factors towards restoration of River Malaba floodplains	2021
Pathak, S.D.; Kulshrestha, M.	Assessment of flood resilience using RAAAR framework: The case of Narmada River Basin, India	2021
Hajare, R.; Labhasetwar, P.; Nagarnaik, P.	Assessment of Health Risk and Detailed Evaluation of Causative Factors Associated with Use of Contaminated Groundwater in the Remote Atolls	2021
Chen, D.; Mechlowitz, K.; Li, X.; Schaefer, N.; Havelaar, A.H.; McKune, S.L.	Benefits and Risks of Smallholder Livestock Production on Child Nutrition in Low- and Middle-Income Countries	2021
Mora, H.; Mendoza-Tello, J.C.; Varela-Guzman, E.G.; Szymański, J.	Blockchain technologies to address smart city and society challenges	2021
Upeshika Heenetigala, Leon Kapetas, Richard Fenner	Building resilience in water supply infrastructure in the face of future uncertainties: Insight from Cape Town	2021
Smith, D.W.; Islam, M.; Furst, K.E.; Mustaree, S.; Crider, Y.S.; Akter, N.; Islam, S.A.; Sultana, S.; Mahmud, Z.H.; Rahman, M.; Mitch, W.A.; Davis, J.	Chlorine taste can increase simulated exposure to both fecal contamination and disinfection byproducts in water supplies	2021
Kayaga, S.M.; Amankwaa, E.F.; Gough, K.V.; Wilby, R.L.; Abarike, M.A.; Codjoe, S.N.A.; Kasei, R.; Nabilse, C.K.; Yankson, P.W.K.; Mensah, P.; Abdullah, K.; Griffiths, P.	Cities and extreme weather events: impacts of flooding and extreme heat on water and electricity services in Ghana	2021
Omotayo, A.O.; Olagunju, K.O.; Omotoso, A.B.; Ogunniyi, A.I.; Otekunrin, O.A.; Daud, A.S.	Clean water, sanitation and under-five children diarrhea incidence: Empirical evidence from the South Africa’s General Household Survey	2021
Jordan, J.C.	Climate shocks and adaptation strategies in coastal Bangladesh: does microcredit have a part to play?	2021
Hafiz Qaisar Yasin, Jessica Breadsell, Muhammad Naveed Tahir	Climate-water governance: a systematic analysis of the water sector resilience and adaptation to combat climate change in Pakistan	2021
Jofre, J.; Lucena, F.; Blanch, A.R.	Coliphages as a complementary tool to improve the management of urban wastewater treatments and minimize health risks in receiving waters	2021
García, E.; Vale, R.; Vale, B.	Collapsing Gracefully: Making a Built Environment that is Fit for the Future	2021
Haque, A.E.; Mukhopadhyay, P.; Nepal, M.; Shammin, R.	Communities, climate change adaptation and win-win solutions	2021
Howard, P.H.	Concentration and Power in the Food System: Who Controls What We Eat?, Revised Edition	2021
Haider, H.; Alhetari, M.; Ghumman, A.R.; Al-Salamah, I.S.; Thabit, H.; Md. Shafiquzzaman, M.	Continuous performance improvement framework for sustainable wastewater treatment facilities in arid regions: Case of wadi rumah in qassim, saudi arabia	2021
Giné-Garriga, R.; Delepiere, A.; Ward, R.; Alvarez-Sala, J.; Alvarez-Murillo, I.; Mariezcurrena, V.; Sandberg, H.G.; Saikia, P.; Avello, P.; Thakar, K.; Ibrahim, E.; Nouvellon, A.; El Hattab, O.; Hutton, G.; Jiménez, A.	COVID-19 water, sanitation, and hygiene response: Review of measures and initiatives adopted by governments, regulators, utilities, and other stakeholders in 84 countries	2021
Kassegn, A.	COVID-19: The impacts of the global crises on African remittances and countries response to this an extreme crisis	2021
Guo, R.	Cross-Border Resource Management	2021
Marathe, D.; Singh, A.; Raghunathan, K.; Thawale, P.; Kumari, K.	Current available treatment technologies for saline wastewater and land-based treatment as an emerging environment-friendly technology: A review	2021
Price, H.D.; Adams, E.A.; Nkwanda, P.D.; Mkandawire, T.; Quilliam, R.S.	Daily changes in household water access and quality in urban slums undermine global safe water monitoring programmes	2021
Bose, D.; Saini, D.K.; Yadav, M.; Shrivastava, S.; Parashar, N.	Decentralized Solar Energy Access and Assessment of Performance Parameters for Rural Communities in India	2021
Chambers, K.G.; Carrico, A.R.; Cook, S.M.	Drivers of sustained sanitation access: Social network and demographic predictors of latrine reconstruction after flooding disasters	2021
Alizadeh, M.; Zabihi, H.; Rezaie, F.; Asadzadeh, A.; Wolf, I.D.; Langat, P.K.; Khosravi, I.; Pour, A.B.; Nataj, M.M.; Pradhan, B.	Earthquake vulnerability assessment for urban areas using an ann and hybrid swot-qspm model	2021
Balaei, B.; Noy, I.; Wilkinson, S.; Potangaroa, R.	Economic factors affecting water supply resilience to disasters	2021
van den Berg, H.; Quaye, M.N.; Nguluve, E.; Schijven, J.; Ferrero, G.	Effect of operational strategies on microbial water quality in small scale intermittent water supply systems: The case of Moamba, Mozambique	2021
Chandrappa, R.; Das, D.B.	Environmental health - theory and practice: Volume 2: Coping with environmental health	2021
Banks, E.W.; Cook, P.G.; Owor, M.; Okullo, J.; Kebede Gurmessa, S.; Nedaw, D.; Mleta, P.; Fallas, H.; Gooddy, D.; John MacAllister, D.; Mkandawire, T.; Makuluni, P.; Shaba, C.E.; MacDonald, A.M.	Environmental tracers to evaluate groundwater residence times and water quality risk in shallow unconfined aquifers in sub Saharan Africa	2021
Duttaroy, A.K.	Evidence-Based Nutrition and Clinical Evidence of Bioactive Foods in Human Health and Disease	2021
Huang, F.; Wang, Z.; Liu, J.; Shuai, C.; Li, W.	Exploring rural energy choice from the perspective of multi-dimensional capabilities: Evidence from photovoltaic anti-poverty areas in rural China	2021
Santos, N.F.	Family Relations in the Gospel of Mark	2021
Brunnhuber, S.	Financing Our Future: Unveiling a Parallel Digital Currency System to Fund the SDGs and the Common Good	2021
Nkiaka, E.; Okpara, U.T.; Okumah, M.	Food-energy-water security in sub-Saharan Africa: Quantitative and spatial assessments using an indicator-based approach	2021
Rasolofoson, R.A.; Ricketts, T.H.; Johnson, K.B.; Jacob, A.; Fisher, B.	Forests moderate the effectiveness of water treatment at reducing childhood diarrhea	2021
Turrén-Cruz, T.; Lopez Zavala, M.Á.	Framework proposal for achieving smart and sustainable societies (S3)	2021
Gulati, A.; Zhou, Y.; Huang, J.; Tal, A.; Juneja, R.	From Food Scarcity to Surplus: Innovations in Indian, Chinese and Israeli Agriculture	2021
Taron, A.; Drechsel, P.; Gebrezgabher, S.	Gender Dimensions of Solid and Liquid Waste Management for Reuse in Agriculture in Asia and Africa	2021
Smil, V.	Grand transitions: How the modern world was made	2021
Behera, B.K.; Prasad, R.; Shyambhavee	Healthcare Strategies and Planning for Social Inclusion and Development: Volume 1: Health for All - Challenges and Opportunities in Healthcare Management	2021
Harris, K.M.; Majmundar, M.K.; Becker, T.	High and rising mortality rates among working-age adults	2021
Nelson, S.; Drabarek, D.; Jenkins, A.; Negin, J.; Abimbola, S.	How community participation in water and sanitation interventions impacts human health, WASH infrastructure and service longevity in low-income and middle-income countries: A realist review	2021
Shah, S.H.	How is water security conceptualized and practiced for rural livelihoods in the global South? A systematic scoping review	2021
Lindstaedt, N.	Human Security in Disease and Disaster	2021
Chala, G.; Eguale, T.; Abunna, F.; Asrat, D.; Stringer, A.	Identification and Characterization of Campylobacter Species in Livestock, Humans, and Water in Livestock Owning Households of Peri-urban Addis Ababa, Ethiopia: A One Health Approach	2021
Kalanda-Joshua, M.K.; Chirwa, R.K.; Ngongondo, C.; Monjerezi, M.; Mwathunga, E.; Kasei, R.	Impact of Floods on Access to Drinking Water: A Focus on 2019 Floods in Magalasi Village in Chikwawa District, Malawi	2021
Ulman, S.-R.; Mihai, C.; Cautisanu, C.	Inconsistencies in the dynamics of sustainable development dimensions in central and eastern european countries	2021
Mvongo, V.D.; Defo, C.; Tchoffo, M.	Indicator-based rural water service sustainability assessment: A review	2021
Faust, K.M.; Roy, A.; Feinstein, S.; Poleacovschi, C.; Kaminsky, J.	Individual responsibility towards providing water and wastewater public goods for displaced persons: How much and how long is the public willing to pay?	2021
Nour, I.; Hanif, A.; Ryan, M.; Eifan, S.	Insights into gastrointestinal virome: Etiology and public exposure	2021
Overgaard, H.J.; Dada, N.; Lenhart, A.; Stenström, T.A.B.; Alexander, N.	Integrated disease management: Arboviral infections and waterborne diarrhoea; Gestion intégrée des maladies: Arboviroses et diarrhées liées à l'eau; Gestión integrada de enfermedades: Infecciones arbovirales y diarreas transmitidas por el agua	2021
Pacheco, E.-M.; Bisaga, I.; Oktari, R.S.; Parikh, P.; Joffe, H.	Integrating psychosocial and WASH school interventions to build disaster resilience	2021
R. Farmani, Joe Dalton, Bambos Charalambous, Elizabeth Lawson, Sarah Bunney	Intermittent water supply systems and their resilience to COVID-19: IWA IWS SG survey	2021
Mastrogregori, M.	International bibliography of historical sciences	2021
Seelarbokus, C.B.	International Environmental Cooperation and The Global Sustainability Capital Framework	2021
Chirgwin, H.; Cairncross, S.; Zehra, D.; Sharma Waddington, H.	Interventions promoting uptake of water, sanitation and hygiene (WASH) technologies in low- and middle-income countries: An evidence and gap map of effectiveness studies	2021
Zavala, E.; King, S.E.; Sawadogo-Lewis, T.; Roberton, T.	Leveraging water, sanitation and hygiene for nutrition in low- and middle-income countries: A conceptual framework	2021
Diep, L.; Martins, F.P.; Campos, L.C.; Hofmann, P.; Tomei, J.; Lakhanpaul, M.; Parikh, P.	Linkages between sanitation and the sustainable development goals: A case study of Brazil	2021
Guo, Z.; Boeing, W.J.; Borgomeo, E.; Xu, Y.; Weng, Y.	Linking reservoir ecosystems research to the sustainable development goals	2021
Tesfaye, M.; Moges, S.; Melesse, A.M.; Agide, Z.	Long-term water–energy–food security and resources sustainability: a case study of Ethiopia by 2030 and 2050	2021
Guo, D.; Thomas, J.; Lazaro, A.B.; Matwewe, F.; Johnson, F.	Modelling the influence of short-term climate variability on drinking water quality in tropical developing countries: A case study in Tanzania	2021
Daly, S.W.; Lowe, J.; Hornsby, G.M.; Harris, A.	Multiple water source use in low- And middle-income countries: A systematic review	2021
Chan, E.Y.Y.; Tong, K.H.Y.; Dubois, C.; Donnell, K.M.; Kim, J.H.; Hung, K.K.C.; Kwok, K.O.	Narrative review of primary preventive interventions against water-borne diseases: Scientific evidence of health-edrm in contexts with inadequate safe drinking water	2021
Bremer, L.L.; Keeler, B.; Pascua, P.; Walker, R.; Sterling, E.	Nature-based solutions, sustainable development, and equity	2021
Wunderlich, S.; St George Freeman, S.; Galindo, L.; Brown, C.; Kumpel, E.	Optimizing household water decisions for managing intermittent water supply in Mexico City	2021
Guangtao Fu, David Butler	Pathways towards sustainable and resilient urban water systems	2021
Ito, Y.; Kobayashi, Y.; Yokomichi, H.; Malla, S.S.; Kiem, A.S.; Nishida, K.	Physical and non-physical factors associated with water consumption at the household level in a region using multiple water sources	2021
Haines, A.; Frumkin, H.	PLANETARY HEALTH: Safeguarding Human Health and the Environment in the Anthropocene	2021
Brears, R.C.	Regional Water Security	2021
Caruso, G.D.	Rejecting Retributivism: FREE WILL, PUNISHMENT, AND CRIMINAL JUSTICE	2021
Tartaro, C.	Research methods for criminal justice and criminology: A text and reader	2021
Leslie Morris-Iveson, St John Day	Resilience of Water Supply in Practice: Experiences from the Frontline	2021
Kassegn, A.; Endris, E.	Review on socio-economic impacts of ‘Triple Threats’ of COVID-19, desert locusts, and floods in East Africa: Evidence from Ethiopia	2021
Luo, J.	Rural Long Tail Public Service and the Correction Mechanism: Evidence from China	2021
Odagiri, M.; Thomas, A.; Listyasari, M.; Mills, F.; Bain, R.E.S.; Muhammad, Z.; Slaymaker, T.; Mardikanto, A.; Gultom, A.; Indiyani, A.; Rangkuti, H.; Willetts, J.	Safely managed on-site sanitation: A national assessment of sanitation services and potential fecal exposure in Indonesia	2021
Cookey, P.E.; Peter-Cookey, M.A.	Safe-Sanitation Adaptive-Integrated Management Systems (SAIMS): A Conceptual Process Tool for Incorporating Resilience	2021
de Araujo, W.C.; Oliveira-Esquerre, K.P.O.; Sahin, O.; Silva, B.B.S.	Scarcity Pricing for Water Demand Management: A Case Study in Campina Grande – Brazil	2021
Cassivi, A.; Tilley, E.; Waygood, O.; Dorea, C.	Seasonal Preferences and Alternatives for Domestic Water Sources: A Prospective Cohort Study in Malawi	2021
Ibrahim, A.S.; Memon, F.A.; Butler, D.	Seasonal variation of rainy and dry season per capita water consumption in Freetown city sierra Leone	2021
Foster, T.; Priadi, C.; Kotra, K.K.; Odagiri, M.; Rand, E.C.; Willetts, J.	Self-supplied drinking water in low- and middle-income countries in the Asia-Pacific	2021
Halimani, T.; Marandure, T.; Chikwanha, O.C.; Molotsi, A.H.; Abiodun, B.J.; Dzama, K.; Mapiye, C.	Smallholder sheep farmers’ perceived impact of water scarcity in the dry ecozones of South Africa: Determinants and response strategies	2021
Khan, S.R.; Khan, S.R.	Social Capital and Collective Action in Pakistani Rural Development	2021
Engel-Di Mauro, S.E.-D.	Socialist States and the Environment: Lessons for Ecosocialist Futures	2021
Fallon Grasham, C.F.; Neville, G.	Socio-political processes must be emphasised alongside climate change and urbanisation as key drivers of urban water insecurity	2021
Shammi, M.; Bodrud-Doza, M.; ISLAM, A.R.M.T.; Rahman, M.M.	Strategic assessment of COVID-19 pandemic in Bangladesh: comparative lockdown scenario analysis, public perception, and management for sustainability	2021
Parikh, P.; Diep, L.; Hofmann, P.; Tomei, J.; Campos, L.C.; Teh, T.-H.; Mulugetta, Y.; Milligan, B.; Lakhanpaul, M.	Synergies and trade-offs between sanitation and the sustainable development goals	2021
Nemetz, P.N.	The economics and business of sustainability	2021
Howard, G.	The future of water and sanitation: Global challenges and the need for greater ambition	2021
Dye, C.	The Great Health Dilemma: Is Prevention Better than Cure?	2021
Howard, G.; Nijhawan, A.; Flint, A.; Baidya, M.; Pregnolato, M.; Ghimire, A.; Poudel, M.; Lo, E.; Sharma, S.; Mengustu, B.; Ayele, D.M.; Geremew, A.; Wondim, T.	The how tough is WASH framework for assessing the climate resilience of water and sanitation	2021
Bastos-Lima, M.G.	The politics of bioeconomy and sustainability: Lessons from biofuel governance, policies and production strategies in the emerging world	2021
Kayiwa, R.; Kasedde, H.; Lubwama, M.; Kirabira, J.B.	The potential for commercial scale production and application of activated carbon from cassava peels in Africa: A review	2021
Balantine, J.H.; Stuber, J.; Everitt, J.G.	The sociology of education: A systematic analysis	2021
Branco Dos Santos, F.D.	Time, Progress, Growth and Technology: How Humans and the Earth are Responding	2021
Sweya, L.N.; Wilkinson, S.	Tool development to measure the resilience of water supply systems in Tanzania: Economic dimension	2021
Khan, N.; Ray, R.L.; Kassem, H.S.; Ihtisham, M.; Abdullah; Simplice, S.A.; Ansah, S.; Zhang, S.	Toward cleaner production: Can mobile phone technology help reduce inorganic fertilizer application? evidence using a national level dataset	2021
Huang, L.; Zhou, M.	Trends in global research on sanitation: A 30-year perspective from 1990 to 2019	2021
Osinuga, A.; Janssen, B.; Fethke, N.B.; Story, W.T.; Imaledo, J.A.; Baker, K.K.	Understanding rural women’s domestic work experiences (Dwe) in ibadan, nigeria: Development of a measurement tool using confirmatory factor analysis	2021
Engel-Di Mauro, S.E.-D.; Martin, G.	Urban food production for ecosocialism: Cultivating the city	2021
Guo, J.; Niu, H.; Xiao, D.; Sun, X.; Fan, L.	Urban Green-space Water-consumption characteristics and its driving factors in China	2021
Bhattarai, K.; Conway, D.	Urban Growth	2021
Uddin, M.J.; Jeong, Y.-K.	Urban river pollution in Bangladesh during last 40 years: potential public health and ecological risk, present policy, and future prospects toward smart water management	2021
Ravina, M.; Galletta, S.; Dagbetin, A.; Kamaleldin, O.A.H.; Mng’ombe, M.; Mnyenyembe, L.; Shanko, A.; Zanetti, M.	Urban wastewater treatment in african countries: Evidence from the hydroaid initiative	2021
Thomas, E.; Brown, J.	Using Feedback to Improve Accountability in Global Environmental Health and Engineering	2021
Angelakis, A.N.; Valipour, M.; Ahmed, A.T.; Tzanakakis, V.; Paranychianakis, N.V.; Krasilnikoff, J.; Drusiani, R.; Mays, L.; El-Gohary, F.; Koutsoyiannis, D.; Khan, S.; del Giacco, L.J.	Water conflicts: From ancient to modern times and in the future	2021
Di Vaio, A.; Trujillo, L.; D’Amore, G.; Palladino, R.	Water governance models for meeting sustainable development Goals:A structured literature review	2021
Miller, J.D.; Workman, C.L.; Panchang, S.V.; Sneegas, G.; Adams, E.A.; Young, S.L.; Thompson, A.L.	Water Security and Nutrition: Current Knowledge and Research Opportunities	2021
Nkiaka, E.; Bryant, R.G.; Okumah, M.; Gomo, F.F.	Water security in sub-Saharan Africa: Understanding the status of sustainable development goal 6	2021
MacTaggart, I.; Baker, S.; Bambery, L.; Iakavai, J.; Kim, M.J.; Morrison, C.; Poilapa, R.; Shem, J.; Sheppard, P.; Tanguay, J.; Wilbur, J.	Water, women and disability: Using mixed-methods to support inclusive wash programme design in Vanuatu	2021
Feraru, A.Ş.	Weak States, Vulnerable Governments, and Regional Cooperation: An ASEAN Case Study	2021
Sena, A.; Ebi, K.	When land is under pressure health is under stress	2021
Hasan, H.; Parker, A.; Pollard, S.J.T.	Whither regulation, risk and water safety plans? Case studies from Malaysia and from England and Wales	2021
Ahsan, M.N.; Hadiujjaman, S.; Islam, M.S.; Nasrin, N.; Akter, M.; Parvin, G.A.; Hossain, M.S.	Willingness to pay for improved safe drinking water in a coastal urban area in Bangladesh	2021
J. Charles, K.J.; Nowicki, S.; Bartram, J.K.	A framework for monitoring the safety of water services: from measurements to security	2020
Borges-Pedro, J.P.B.; Oliveira, C.A.S.; de Lima, S.C.R.B.; von Sperling, M.	A review of sanitation technologies for flood-prone areas	2020
Mallory, A.; Holm, R.; Parker, A.	A review of the financial value of faecal sludge reuse in low-income countries	2020
Cramer, C.; Sender, J.; Oqubay, A.	African economic development: Evidence, theory, policy	2020
Kraftl, P.	After childhood: Re-thinking environment, materiality and media in children’s lives	2020
Ben Hassen, T.; El Bilali, H.; Al-Maadeed, M.	Agri-food markets in Qatar: Drivers, trends, and policy responses	2020
Lesch, O.-M.; Walter, H.; Wetschka, C.; Hesselbrock, M.N.; Hesselbrock, V.; Pombo, S.	Alcohol and Tobacco: Medical and sociological aspects of use, abuse and addiction	2020
Gudda, F.O.; Waigi, M.G.; Odinga, E.S.; Yang, B.; Carter, L.; Gao, Y.	Antibiotic-contaminated wastewater irrigated vegetables pose resistance selection risks to the gut microbiome	2020
Sun, W.; Bocchini, P.; Davison, B.D.	Applications of artificial intelligence for disaster management	2020
Bénédicte Rulleau	Assessing the benefits of improving the resilience of water distribution networks	2020
Stoler, J.; Wendy, E.; Wutich, A.	Beyond handwashing: Water insecurity undermines COVID-19 response in developing areas	2020
Schlesinger, W.H.; Bernhardt, E.	Biogeochemistry: An Analysis of Global Change	2020
Marques, L.	Capitalism and Environmental Collapse	2020
Stoler, J.; Pearson, A.L.; Staddon, C.; Wutich, A.; Mack, E.; Brewis, A.; Rosinger, A.Y.; Adams, E.A.; Ahmed, J.F.; Alexander, M.; Balogun, M.; Boivin, M.; Carrillo, G.; Chapman, K.; Cole, S.; Collins, S.M.; Escobar-Vargas, J.; Freeman, M.C.; Asiki, G.; Ghattas, H.; Hagaman, A.; Jamaluddine, Z.; Jepson, W.E.; Maes, K.; Mathad, J.; Mbullo, P.; Melgar-Quiñónez, H.; Miller, J.D.; Niesluchowski, M.; …	Cash water expenditures are associated with household water insecurity, food insecurity, and perceived stress in study sites across 20 low- and middle-income countries	2020
Piperata, B.A.; Lee, S.; Mayta-Apaza, A.C.; Cary, A.; Vílchez, S.; Oruganti, P.; Garabed, R.; Wilson, W.; Lee, J.	Characterization of the gut microbiota of Nicaraguan children in a water insecure context	2020
Giannetti, B.F.; Agostinho, F.; Cabello Eras, J.J.C.; YANG, Z.; Almeida, C.M.V.B.	Cleaner production for achieving the sustainable development goals	2020
Mousavi, A.; Ardalan, A.; Takian, A.; Ostadtaghizadeh, A.; Naddafi, K.; Massah Bavani, A.M.	Climate change and health in Iran: A narrative review	2020
Venkataramanan, V.; Collins, S.M.; Clark, K.A.; Yeam, J.; Nowakowski, V.G.; Young, S.L.	Coping strategies for individual and household-level water insecurity: A systematic review	2020
Mills, F.; Willetts, J.; Evans, B.; Carrard, N.; Kohlitz, J.	Costs, Climate and Contamination: Three Drivers for Citywide Sanitation Investment Decisions	2020
Jamalluddin, N.; Symonds, R.C.; Mayes, S.; Ho, W.K.; Massawe, F.	Diversifying crops for food and nutrition security: A case of vegetable amaranth, an ancient climate-smart crop	2020
Akhter, M.; Uddin, S.M.N.; Rafa, N.; Hridi, S.M.; Staddon, C.; Powell, W.	Drinking water security challenges in rohingya refugee camps of cox's bazar, Bangladesh	2020
Ratnayake, R.; Finger, F.; Edmunds, W.J.; Checchi, F.	Early detection of cholera epidemics to support control in fragile states: estimation of delays and potential epidemic sizes	2020
Banerjee, O.; Bagstad, K.J.; Cicowiez, M.; Dudek, S.; Horridge, M.; Alavalapati, J.R.R.; Masozera, M.; Rukundo, E.; Rutebuka, E.	Economic, land use, and ecosystem services impacts of Rwanda's Green Growth Strategy: An application of the IEEM+ESM platform	2020
Phiri, E.; Kasambara, A.; Rowley, P.N.; Blanchard, R.E.	Energy and Water Needs Analysis: Towards Solar Photovoltaic Water Pumping in Rural Areas of Malawi	2020
Kayaga, S.M.; Fisher, J.; Goodall, S.; Kanyesigye, C.; Kaggwa, R.; Nambiro, M.; Kitakufe, R.; Otema, J.B.; Mafunguro, R.; Ahabwe, G.	Enhancing livelihoods of the urban poor through productive uses of utility-supplied water services – Evidence from Kampala, Uganda	2020
Chandrappa, R.; Das, D.B.	Environmental health - Theory and practice	2020
Behnke, N.L.; Cronk, R.; Shackelford, B.B.; Cooper, B.; Tu, R.; Heller, L.; Bartram, J.K.	Environmental health conditions in protracted displacement: A systematic scoping review	2020
Mallory, A.; Akrofi, D.; Dizon, J.; Mohanty, S.; Parker, A.; Rey, D.; Prasad, S.; Welivita, I.; Brewer, T.; Mekala, S.; Bundhoo, D.; Lynch, K.; Mishra, P.; Willcock, S.; Hutchings, P.	Evaluating the circular economy for sanitation: Findings from a multi-case approach	2020
Yuan, H.; Yin, Z.; Zhao, C.; Yang, Z.; Gao, S.; Zhao, S.; Xu, L.; Tan, T.; Fang, Y.	Evaluation of Smart Environmental Protection Systems and Novel UV-Oriented Solution for Integration, Resilience, Inclusiveness and Sustainability	2020
Cao, S.; Wang, C.; Yang, Z.; Yuan, H.; Sun, A.; Xie, H.; Zhang, L.; Fang, Y.	Evaluation of Smart Humanity Systems and Novel UV-Oriented Solution for Integration, Resilience, Inclusiveness and Sustainability	2020
Hoque, S.F.; Hope, R.	Examining the Economics of Affordability through Water Diaries in Coastal Bangladesh	2020
Capodaglio, A.G.	Fit-for-purpose urban wastewater reuse: Analysis of issues and available technologies for sustainable multiple barrier approaches	2020
Pires, S.M.; Thomsen, S.T.; Nauta, M.; Poulsen, M.; Jakobsen, L.S.	Food Safety Implications of Transitions Toward Sustainable Healthy Diets	2020
Jacobs, N.; Clément, C.W.-Y.; Frison, E.	From uniformity to diversity: The potential of agroecology to transform food systems	2020
Foster, T.; Furey, S.; Banks, B.; Willetts, J.	Functionality of handpump water supplies: a review of data from sub-Saharan Africa and the Asia-Pacific region	2020
Özerol, G.; Harris, L.M.	Gender-Sensitive Analysis of Water Governance: Insights for Engendering Energy Transitions	2020
Anthonj, C.; Wren Tracy, J.W.; Fleming, L.; Shields, K.F.; Tikoisuva, W.M.; Kelly, E.; Thakkar, M.B.; Cronk, R.; Overmars, M.; Bartram, J.K.	Geographical inequalities in drinking water in the Solomon Islands	2020
Rout, P.K.; Kumar, A.; Behera, B.K.	Goat Production and Supply Chain Management in the Tropics	2020
Kebede Gurmessa, S.; Teferi Taye, M.T.	Groundwater scarcity and management in the arid areas in East Africa	2020
Thomas, M.L.H.; Channon, A.A.; Bain, R.E.S.; Mutono, M.; Wright, J.A.	Household-reported availability of drinking water in Africa: A systematic review	2020
Rogers, A.T.	Human Behavior in the Social Environment: Perspectives on Development, the Life Course, and Macro Contexts	2020
Smith, L.E.; Schuster, R.C.; Dumas, S.E.; Kerr, B.T.	Interactive Systems in Nutrition: Perspectives from Epidemiology, Veterinary Science, Nutrition, Anthropology, and Community Health	2020
Wahab, A.B.; Oni, O.J.	Investigation of the use of photovoltaic solar water pump by occupants of residential buildings in Ile-Ife, Nigeria	2020
Miller, J.D.; Vonk, J.; Staddon, C.; Young, S.L.	Is household water insecurity a link between water governance and well-being? A multi-site analysis	2020
Ward, J.S.T.; Lapworth, D.J.; Read, D.S.; Pedley, S.; Banda, S.T.; Monjerezi, M.; Gwengweya, G.; MacDonald, A.M.	Large-scale survey of seasonal drinking water quality in Malawi using in situ tryptophan-like fluorescence and conventional water quality indicators	2020
Durrance-Bagale, A.; Salman, O.M.; Omar, M.; Alhaffar, M.; Ferdaus, M.; Newaz, S.; Krishnan, S.; Howard, N.	Lessons from humanitarian clusters to strengthen health system responses to mass displacement in low and middle-income countries: A scoping review	2020
Lawhon, M.	Making urban theory: Learning and unlearning through southern cities	2020
Martínez-Santos, P.; Martín-Loeches Garrido, M.; Díaz-Alcaide, S.; Danert, K.	Manual borehole drilling as a cost-effective solution for drinking water access in low-income contexts	2020
Singh, K.; Awasthi, A.; Singh, R.P.; Tewari, S.K.	Merging the margins for beneficial biofuels: An Indian perspective	2020
Filippelli, G.; Anenberg, S.; Taylor, M.; van Geen, A.; Khreis, H.	New Approaches to Identifying and Reducing the Global Burden of Disease From Pollution	2020
Ngumba, E.; Gachanja, A.; Nyirenda, J.; Maldonado, J.; Tuhkanen, T.	Occurrence of antibiotics and antiretroviral drugs in source-separated urine, groundwater, surface water and wastewater in the peri-urban area of chunga in lusaka, Zambia	2020
Palansooriya, K.N.; Yang, Y.; Tsang, Y.F.; Sarkar, B.; Hou, D.; Cao, X.; Meers, E.; Rinklebe, J.; Kim, K.-H.; Ok, Y.S.	Occurrence of contaminants in drinking water sources and the potential of biochar for water quality improvement: A review	2020
Diaw, M.T.; Cissé Faye, S.; Gaye, C.B.; Niang, S.; Pouye, A.; Campos, L.C.; Taylor, R.G.	On-site sanitation density and groundwater quality: Evidence from remote sensing and in situ observations in the thiaroye aquifer, Senegal	2020
Frumkin, H.; Das, M.B.; Negev, M.; Rogers, B.C.; Bertollini, R.; Dora, C.; Desai, S.	Protecting health in dry cities: Considerations for policy makers	2020
Trimmer, J.T.; Miller, D.C.; Byrne, D.M.; Lohman, H.A.C.; Banadda, N.; Baylis, K.; Cook, S.M.; Cusick, R.D.; Jjuuko, F.; Margenot, A.J.; Zerai, A.; Guest, J.S.	Re-Envisioning Sanitation As a Human-Derived Resource System	2020
Spuhler, D.; Lüthi, C.	Review of frameworks and tools for urban strategic sanitation planning: Considering technology innovations and sustainability	2020
Stephen Foster, Michael Eichholz, Bertil Nlend, Julia Gathu	Securing the critical role of groundwater for the resilient water-supply of urban Africa	2020
J. Gnadlinger	Smart rainwater management and its impacts on drought resilience by Rural Semi-Arid communities: a case study of Northeast Brazil	2020
Smiley, S.L.; Stoler, J.	Socio-environmental confounders of safe water interventions	2020
Bano, R.; Khiadani, M.; Burian, S.	Socio-hydrological modelling to assess reliability of an urban water system under formal-informal supply dynamics	2020
Pereira, P.; Barceló, D.; Panagos, P.	Soil and water threats in a changing environment	2020
Koliou, M.; van de Lindt, J.W.; McAllister, T.P.; Ellingwood, B.R.; Dillard, M.; Cutler, H.	State of the research in community resilience: progress and challenges	2020
Kalanda-Joshua, M.K.; Ngongondo, C.; Chipungu, F.; Malidadi, C.; Liwenga, E.; Majule, A.; Stathers, T.; Kosgei, J.R.; Lamboll, R.	Strengthening Horticultural Innovation Systems for Adaptation to Effects of Urbanisation and Climate Variability in Peri-Urban Areas	2020
Borgomeo, E.; Fawzi, N.A.-M.; Hall, J.W.; Jägerskog, A.; Nicol, A.; Sadoff, C.W.; Salman, M.; Santos, N.; Talhami, M.	Tackling the Trickle: Ensuring Sustainable Water Management in the Arab Region	2020
Park, T.K.; Greenberg, J.B.	Terrestrial Transformations: A Political Ecology Approach to Society and Nature	2020
Talhami, M.; Zeitoun, M.	The impact of attacks on urban services II: Reverberating effects of damage to water and wastewater systems on infectious disease	2020
Elysia, V.; Wihadanto, A.	THE IMPACT OF POOR SANITATION ON TOURISM DEVELOPMENT: A GLOBAL REVIEW	2020
Akinsemolu, A.A.	The principles of green and sustainability science	2020
Oluwosanyo, G.O.	The Swiss cheese failure model of self-supply hand-dug wells in developing nations: Review and implications for water safety planning	2020
Huang, Y.	Toxic Politics: China's Environmental Health Crisis and its Challenge to the Chinese State	2020
Ebi, K.; Harris, F.; Sioen, G.B.; Wannous, C.; Anyamba, A.; Bi, P.; Boeckmann, M.; Bowen, K.; Cissé, G.; Dasgupta, P.; Dida, G.O.; Gasparatos, A.; Gatzweiler, F.; Javadi, F.; Kanbara, S.; Koné, B.; Maycock, B.; Morse, A.; Murakami, T.; Mustapha Olaitan, A.; Pongsiri, M.; Suzán, G.; Watanabe, C.; Capon, A.	Transdisciplinary research priorities for human and planetary health in the context of the 2030 agenda for sustainable development	2020
Dery, F.; Bisung, E.; Dickin, S.; Dyer, M.	Understanding empowerment in water, sanitation, and hygiene (WASH): A scoping review	2020
Shrestha, S.; Aihara, Y.; Bhattarai, A.P.; Bista, N.; Kondo, N.; Futaba, K.; Nishida, K.; Shindo, J.	Urban household water resilience and source selection in nepal pre-and post-disaster	2020
Abubakar, I.R.; Lawanson, T.O.; Usman, A.S.	Urban planning practices in Lagos	2020
Kookana, R.S.; Drechsel, P.; Jamwal, P.; Vanderzalm, J.	Urbanisation and emerging economies: Issues and potential solutions for water and food security	2020
Syafri, S.; Surya, B.; Ridwan, R.; Bahri, S.; Rasyidi, E.S.; Sudarman, S.	Water quality pollution control and watershed management based on community participation in maros city, south sulawesi, indonesia	2020
Bivins, A.; Lowry, S.; Murphy, H.M.; Borchardt, M.; Coyte, R.; Labhasetwar, P.; Brown, J.	Waterborne pathogen monitoring in Jaipur, India reveals potential microbial risks of urban groundwater supply	2020
Owokotomo, A.I.; Ajayi, O.O.; Alabi, O.O.; Chukwuka, A.V.	Watershed land use, surface water vulnerability and public health risks of two urban rivers, Ado-Ekiti, South-West Nigeria	2020
Abu, T.Z.; Elliott, S.J.	When it is not measured, how then will it be planned for? WaSH a critical indicator for universal health coverage in Kenya	2020
Weber, N.; Patrick, M.; Hayter, A.; Martinsen, A.L.; Gelting, R.	A conceptual evaluation framework for the water and sanitation for health facility improvement tool (WASH FIT)	2019
Sehreen, F.; Masud, M.M.; Akhtar, R.; Masum, M.R.A.	A contingent valuation approach to evaluating willingness to pay for an improved water pollution management system in Dhaka City, Bangladesh	2019
Debiasi, R.; Benetti, A.D.	A methodology to assess vulnerability in small communities drinking water systems; Uma metodologia para avaliar a vulnerabilidade de pequenos sistemas comunitários de água para consumo humano	2019
Groot, R.; Bayrak, M.M.	Achieving water security in peri-urban Yangon: Exploring the local governance processes	2019
Sahay, S.	Adaptation to health outcomes of climate change and variability at the city level: An empirical decision support tool	2019
Elliott, M.; Foster, T.; MacDonald, M.C.; Harris, A.; Schwab, K.J.; Hadwen, W.L.	Addressing how multiple household water sources and uses build water resilience and support sustainable development	2019
Salami, D.; Shaaban, A.N.; Martins, M.D.R.O.	Africa rising, a narrative for life expectancy gains? Evidence from a health production function	2019
Russell, A.	Anthropology of tobacco: Ethnographic adventures in non-human worlds	2019
Di Pillo, F.; Anríquez, G.; Alarcón, P.; Jiménez-Bluhm, P.; Galdames, P.; Nieto, V.; Schultz-Cherry, S.; Hamilton-West, C.	Backyard poultry production in Chile: animal health management and contribution to food access in an upper middle-income country	2019
Wenhold, F.A.M.; Faber, M.	Beverage intake: Nutritional role, challenges, and opportunities for developing countries	2019
Leong Ching, Zhou Yishu, Nisha Francine Rajoo, Sarah Ruiqi Tan	Constructing a fabula of resilience: a lived experience approach	2019
Cheung, C.-K.; Yue, X.	Creativity in Chinese contexts: Sociocultural and dispositional analyses	2019
Rowledge, L.R.	Crowd Rising: Building a Sustainable World through Mass Collaboration	2019
Howlett, M.	Designing public policies: Principles and instruments: Second edition	2019
Diaz-Sarachaga, J.M.; Jato-Espino, D.	Development and application of a new Resilient, Sustainable, Safe and Inclusive Community Rating System (RESSICOM)	2019
Deb, S.; Sunny, A.M.; Majumdar, B.	Disadvantaged children in India: Empirical evidence, policies and actions	2019
Cassivi, A.; Guilherme, S.; Bain, R.E.S.; Tilley, E.; Waygood, O.; Dorea, C.	Drinking water accessibility and quantity in low and middle-income countries: A systematic review	2019
Wang, Y.; Wu, N.; Kunze, C.; Long, R.; Perlik, M.	Drivers of Change to Mountain Sustainability in the Hindu Kush Himalaya	2019
Banerjee, A.; Chakrabarty, M.; Rakshit, N.; Bhowmick, A.R.; Ray, S.	Environmental factors as indicators of dissolved oxygen concentration and zooplankton abundance: Deep learning versus traditional regression approach	2019
Stakhiv, E.Z.; Werick, W.; Brumbaugh, R.W.	Evolution of drought management policies and practices in the United States	2019
Bakshi, B.; Nawrotzki, R.J.; Donato, J.R.; Silva Lelis, L.S.	Exploring the link between climate variability and mortality in Sub-Saharan Africa	2019
DuChanois, R.M.; Liddle, E.S.; Fenner, R.; Jeuland, M.; Evans, B.; Cumming, O.; Zaman, R.U.; Mujica-Pereira, A.V.; Ross, I.; Gribble, M.O.; Brown, J.	Factors Associated with Water Service Continuity for the Rural Populations of Bangladesh, Pakistan, Ethiopia, and Mozambique	2019
Setty, K.; Loret, J.-F.; Courtois, S.; Hammer, C.C.; Hartemann, P.; Lafforgue, M.; Litrico, X.; Manasfi, T.; Medema, G.; Shaheen, M.; Tesson, V.; Bartram, J.K.	Faster and safer: Research priorities in water and health	2019
Kher, J.; Aggarwal, S.	Gender Analysis Approach to Analyzing Gender Differentiated Impacts of Coping Strategies to Climate Change	2019
Hanrahan, M.; Mercer, N.	Gender and water insecurity in a subarctic indigenous community; Le genre et l’insécurité d’accès à l’eau dans une communauté autochtone subarctique	2019
Potter, R.; Binns, T.; Elliott, J.A.; Nel, E.; Smith, D.W.	Geographies of Development: An Introduction to Development Studies, Fourth Edition	2019
Carrard, N.; Foster, T.; Willetts, J.	Groundwater as a source of drinking water in southeast Asia and the Pacific: A multi-country review of current reliance and resource concerns	2019
Bhattacharjee, S.; Saha, B.; Saha, B.; Uddin, M.S.; Panna, C.H.; Bhattacharya, P.; Saha, R.	Groundwater governance in Bangladesh: Established practices and recent trends	2019
DeLancey, M.D.; Mbuh, R.N.; DeLancey, M.W.	Historical Dictionary of the Republic of Cameroon, Fifth Edition	2019
Khot, R.A.; Mueller, F.	Human-food interaction	2019
Wali, S.U.; Umar, K.J.; Abubakar, S.D.; Ifabiyi, I.P.; Dankani, I.M.; Shera, I.M.; Yauri, S.G.	Hydrochemical characterization of shallow and deep groundwater in Basement Complex areas of southern Kebbi State, Sokoto Basin, Nigeria	2019
Josa, I.; Aguado, A.	Infrastructures and society: from a literature review to a conceptual framework	2019
Bross, L.; Krause, S.; Wannewitz, M.; Stock, E.; Sandholz, S.; Wienand, I.	Insecure security: Emergency water supply and minimum standards in Countries with a high supply reliability	2019
Hernández-Moreno, S.	International experiences on the implementation of public policies for urban planning to face climate change	2019
Pennington, K.L.; Cech, T.V.	Introduction to water resources and environmental issues	2019
Alam, K.; Rahman, M.H.	Post-disaster recovery in the cyclone Aila affected coastline of Bangladesh: women’s role, challenges and opportunities	2019
Waqas, M.A.; Kaya, C.; Riaz, A.; Farooq, M.; Nawaz, I.; Wilkes, A.; Li, Y.	Potential Mechanisms of Abiotic Stress Tolerance in Crop Plants Induced by Thiourea	2019
Everard, M.	Rebuilding the Earth: Regenerating our planet’s life support systems for a sustainable future	2019
James H. Spencer, Bunnarith Meng	Resilient urbanization and infrastructure governance: the case of the Phnom Penh Water Supply Authority, 1993–2007	2019
Putri, P.W.	Sanitizing Jakarta: decolonizing planning and kampung imaginary	2019
Doob, C.B.	Social Inequality and Social Stratification in US Society	2019
Di Baldassarre, G.; Sivapalan, M.; Rusca, M.; Cudennec, C.; Garcia, M.; Kreibich, H.; Konar, M.; Mondino, E.; Mård, J.; Pande, S.; Sanderson, M.R.; Tian, F.; Viglione, A.; Wei, J.; Wei, Y.; Yu, D.J.; Srinivasan, V.; Blöschl, G.	Sociohydrology: Scientific Challenges in Addressing the Sustainable Development Goals	2019
Brunsma, D.L.; Iyall Smith, K.E.; Gran, B.K.	Sociology for Human Rights: Approaches for Applying Theories and Methods	2019
Kanyesigye, C.; Marks, S.J.; Nakanjako, J.; Kansiime, F.; Ferrero, G.	Status of water safety plan development and implementation in Uganda	2019
Chindarkar, N.; Chen, Y.J.; Gurung, Y.	Subjective Well-Being Effects of Coping Cost: Evidence from Household Water Supply in Kathmandu Valley, Nepal	2019
Munasinghe, M.	SUSTAINABILITY IN THE TWENTY-FIRST CENTURY: Applying Sustainomics to Implement the Sustainable Development Goals	2019
Pradyumna, A.; Egal, F.; Utzinger, J.	Sustainable food systems, health and infectious diseases: Concerns and opportunities	2019
Sillanpӓӓ, M.; Ncibi, C.	The circular economy: Case studies about the transition from the linear economy	2019
Lake, P.; Fenner, R.	The Influence of Underlying Stresses from Environmental Hazards on Resilience in Bangladesh: A System View	2019
Osadchuk, M.A.; Korzhenkov, N.P.; Trushin, M.V.	The problem of water and sanitation on the example of India and Russia	2019
J. Tempelhoff	The rise (and fall?) of resilience in dealing with Cape Town’s water crisis (2015–2018)	2019
Collins, V.E.; Rothe, D.L.	The violence of neoliberalism: Crime, harm and inequality	2019
Forman, R.T.T.	Towns, ecology, and the land	2019
Agustina, R.; Dartanto, T.; Sitompul, R.; Susiloretni, K.A.; Suparmi, n.; Achadi, E.L.; Taher, A.; Wirawan, F.; Sungkar, S.; Sudarmono, P.; Shankar, A.H.; Thabrany, H.; Soewondo, P.; Ahmad, S.A.; Kurniawan, M.; Hidayat, B.; Pardede, D.; Mundiharno; Nelwan, E.J.; Lupita, O.; Setyawan, E.; Nurwahyuni, A.; Martiningsih, D.; Khusun, H.	Universal health coverage in Indonesia: concept, progress, and challenges	2019
Précoma, D.B.; de Oliveira, G.M.M.; Simão, A.F.; Dutra, O.P.; Coelho, O.R.; Izar, M.C.O.; Póvoa, R.M.S.; Giuliano, I.C.B.; Filho, A.C.A.; MacHado, C.A.; Scherr, C.; Fonseca, F.A.H.; Filho, R.D.S.; de Carvalho, T.; Avezum, A.; Esporcatte, R.; Nascimento, B.R.; Brasil, D.P.; Soares, G.P.; Villela, P.B.; Ferreira, R.M.; de Andrade Martins, W.A.; Sposito, A.C.; Halpern, B.; Saraiva, J.F.K.; Carvalho,…	Updated cardiovascular prevention guideline of the Brazilian society of cardiology – 2019	2019
Dobbs, C.; Escobedo, F.J.; Clerici, N.; De La Barrera, F.; Eleuterio, A.A.; MacGregor-Fors, I.; Reyes-Paecke, S.; Vásquez, A.; Zea-Camaño, J.D.; Hernández, H.J.	Urban ecosystem Services in Latin America: mismatch between global concepts and regional realities?	2019
Vishal Singh, Anvita Pandey	Urban water resilience in Hindu Kush Himalaya: issues, challenges and way forward	2019
Mehta, L.; Oweis, T.; Ringler, C.; Schreiner, B.; Varghese, S.	Water for food security, nutrition and social justice	2019
Walsh, J.J.	Wind-borne illness from coastal seas : Present and future consequences of toxic marine aerosols	2019
Cammett, M.; Diwan, I.; Richards, A.; Waterbury, J.	A political economy of the middle east	2018
Sultana, F.; Unicomb, L.E.; Nizame, F.A.; Dutta, N.C.; Ram, P.K.; Luby, S.P.; Winch, P.J.	Acceptability and feasibility of sharing a soapy water system for handwashing in a low-income urban community in Dhaka, Bangladesh: A qualitative study	2018
Lele, S.; Srinivasan, V.; Thomas, B.K.; Jamwal, P.	Adapting to climate change in rapidly urbanizing river basins: insights from a multiple-concerns, multiple-stressors, and multi-level approach	2018
Emerson, S.; Solomon, H.	African security in the twenty-first century: Challenges and opportunities	2018
Macdonald, D.W.; Newman, C.; Harrington, L.A.	Biology and conservation of musteloids	2018
Jackson, J.B.C.; Chapple, S.	Breakpoint: Reckoning with America's environmental crises	2018
Tuihedur Rahman, H.M.; Hickey, G.M.; Ford, J.; Egan, M.A.	Climate change research in Bangladesh: research gaps and implications for adaptation-related decision-making	2018
Mukhopadhyay, R.; Karisiddaiah, S.M.; Mukhopadhyay, J.	Climate change: Alternate governance policy for south Asia	2018
Bastiaens, I.; Rudra, N.	Democracies in Peril Taxation and Redistribution in Globalizing Economies	2018
Mahapatro, M.	Domestic violence and health care in India: Policy and practice	2018
Vörösmarty, C.J.; Rodríguez Osuna, V.; Cak, A.D.; Bhaduri, A.; Bunn, S.E.; Corsi, F.; Gastelumendi, J.; Green, P.; Harrison, I.; Lawford, R.; Marcotullio, P.J.; McClain, M.; McDonald, R.; McIntyre, P.; Palmer, M.; Robarts, R.D.; Szöllösi-Nagy, A.; Tessler, Z.; Uhlenbrook, S.	Ecosystem-based water security and the Sustainable Development Goals (SDGs)	2018
Christensen, J.	Eldercare, Health, and Ecosyndemics in a Perilous World	2018
Steg, L.; Groot, J.I.M.	Environmental psychology: An introduction, second edition	2018
Reckien, D.; Lwasa, S.; Satterthwaite, D.; Mcevoy, D.; Creutzig, F.; Montgomery, M.; Schensul, D.; Balk, D.; Khan, I.A.; Fernandez Milan, B.; Brown, D.; Osorio, J.C.; Tovar-Restrepo, M.; de Sherbinin, A.; Feringa, W.; Sverdlik, A.; Porio, E.; Nair, A.; McCormick, S.; Bautista, E.	Equity, Environmental Justice, and Urban Climate Change	2018
Desalegn, B.B.; Lambert, C.; Riedel, S.; Negesse, T.; Biesalski, H.K.	Ethiopian orthodox fasting and lactating mothers: Longitudinal study on dietary pattern and nutritional status in rural tigray, Ethiopia	2018
Sclar, G.D.; Penakalapati, G.; Caruso, B.A.; Rehfuess, E.A.; Garn, J.V.; Alexander, K.T.; Freeman, M.C.; Boisson, S.; Medlicott, K.; Clasen, T.	Exploring the relationship between sanitation and mental and social well-being: A systematic review and qualitative synthesis	2018
Alders, R.G.; Dumas, S.E.; Rukambile, E.; Magoke, G.; Maulaga, W.; Jong, J.; Costa, R.	Family poultry: Multiple roles, systems, challenges, and options for sustainable contributions to household nutrition security through a planetary health lens	2018
Welcome, M.O.	Gastrointestinal physiology: Development, principles and mechanisms of regulation	2018
Lester, S.; Rhiney, K.	Going beyond basic access to improved water sources: Towards deriving a water accessibility index	2018
Grönwall, J.; Oduro-Kwarteng, S.	Groundwater as a strategic resource for improved resilience: a case study from peri-urban Accra	2018
Ellis, L.; Hoskin, A.W.; Ratnasingam, M.	Handbook of social status correlates	2018
Capolongo, S.; Rebecchi, A.; Dettori, M.; Appolloni, L.; Azara, A.; Buffoli, M.; Capasso, L.; Casuccio, A.; Oliveri Conti, G.O.; D'Amico, A.; Ferrante, M.; Moscato, U.; Oberti, I.; Paglione, L.; Restivo, V.; D’Alessandro, D.	Healthy design and urban planning strategies, actions, and policy to achieve salutogenic cities	2018
Jan, S.; Abbas, N.	Himalayan phytochemicals: Sustainable options for sourcing and developing bioactive compounds	2018
Wutich, A.; Budds, J.; Jepson, W.E.; Harris, L.M.; Adams, E.A.; Brewis, A.; Cronk, L.; Demyers, C.; Maes, K.; Marley, T.; Miller, J.D.; Pearson, A.L.; Rosinger, A.Y.; Schuster, R.C.; Stoler, J.; Staddon, C.; Wiessner, P.; Workman, C.L.; Young, S.L.	Household water sharing: A review of water gifts, exchanges, and transfers across cultures	2018
Wong, C.W.Y.; Miao, X.; Cui, S.; Tang, Y.	Impact of Corporate Environmental Responsibility on Operating Income: Moderating Role of Regional Disparities in China	2018
Esselman, P.C.; Jiang, S.; Peller, H.A.; Buck, D.G.; Wainwright, J.D.	Landscape drivers and social dynamics shaping microbial contamination risk in three Maya communities in Southern Belize, Central America	2018
Curran, F.; Smart, S.; Lacey, J.; Greig, C.; Lant, P.	Learning from experience in the water sector to improve access to energy services	2018
Kadibadiba, T.; Roberts, L.; Duncan, R.	Living in a city without water: A social practice theory analysis of resource disruption in Gaborone, Botswana	2018
Sharachchandra Lele, Karthik Madhyastha, Swati Sulagna, R. Dhavamani, Veena Srinivasan	Match, don't mix: implications of institutional and technical service modalities for water governance outcomes in south Indian small towns	2018
Reinert, K.A.	No small hope: Towards the universal provision of basic goods	2018
Nierenberg, D.	Nourished planet: Sustainability in the global food system	2018
Milledge, D.G.; Gurjar, S.K.; Bunce, J.T.; Tare, V.; Sinha, R.; Carbonneau, P.E.	Population density controls on microbial pollution across the Ganga catchment	2018
Yoko Aihara, Sadhana Shrestha, Sudarshan Rajbhandari, Arun Prasad Bhattarai, Niranjan Bista	Resilience in household water systems and quality of life after the earthquake: a mixed-methods study in urban Nepal	2018
Zang, L.	Re-understanding of contemporary Chinese political development: Qualitative-quantitative analysis	2018
Hanjra, M.A.; Lydecker, M.; Drechsel, P.; Paul, J.	Rural-urban food and nutrient dynamics and nutrient recovery from waste in developing countries	2018
Dzodzomenyo, M.; Fink, G.; Dotse-Gborgbortsi, W.; Wardrop, N.; Aryeetey, G.; Coleman, N.; Hill, A.; Wright, J.A.	Sachet water quality and product registration: A cross-sectional study in Accra, Ghana	2018
Lloyd Owen, D.A.	Smart water: Data capture and analysis for sustainable water management	2018
Carolan, M.	Society and the Environment: Pragmatic Solutions to Ecological Issues, SECOND EDITION	2018
Nieder, R.; Benbi, D.K.; Reichl, F.X.	Soil components and human health	2018
Elmadfa, I.; Meyer, A.L.	The Impact of Global Climate Change on Nutrition Security: A Multidimensional Challenge	2018
Riley-Powell, A.R.; Lee, G.O.; Naik, N.S.; Jensen, K.E.; O'Neal, C.; Salmón-Mulanovich, G.; Hartinger, S.M.; Bausch, D.G.; Paz-Soldan, V.A.	The impact of road construction on subjective well-being in communities in Madre de Dios, Peru	2018
Wijesekera, S.; Gordon, B.; Cavill, S.	THE POTENTIAL OF THE SDG FRAMEWORK TO PROMOTE EQUALITY THROUGH WASH INITIATIVES	2018
Sennett, R.; Burdett, R.; Sassen, S.	The Quito papers and the new urban agenda	2018
Setty, K.; Enault, J.; Loret, J.-F.; Puigdomenech Serra, C.; Martín-Alonso, J.; Bartram, J.K.	Time series study of weather, water quality, and acute gastroenteritis at Water Safety Plan implementation sites in France and Spain	2018
Cheng, S.; Li, Z.; Uddin, S.M.N.; Mang, H.-P.; Zhou, X.; Zhang, J.; Zheng, L.; Zhang, L.	Toilet revolution in China	2018
Luke, H.; Brueckner, M.; Emmanouil, N.	Unconventional gas development in Australia: A critical review of its social license	2018
Dickin, S.; Dagerskog, L.; Jiménez, A.; Andersson, K.; Savadogo, K.	Understanding sustained use of ecological sanitation in rural Burkina Faso	2018
Luby, S.P.	Urban Slums: A Supportive Ecosystem for Typhoidal Salmonellae	2018
Vicuña, S.; Redwood, M.; Dettinger, M.; Noyola, A.; Ferguson, D.B.; Güereca, L.P.; Clark, C.M.; Lulham, N.; Jamwal, P.; Wejs, A.; Lall, U.; Raschid, L.; Omojola, A.; Major, D.C.	Urban Water Systems	2018
King-Okumu, C.	Valuing environmental benefit streams in the dryland ecosystems of Sub-Saharan Africa	2018
Liu, W.; Zhao, M.; Xu, T.	Water poverty in rural communities of arid areas in China	2018
Wyman, R.; Yao, G.	WATER, FOOD, AND THE ENVIRONMENT	2018
Foster, T.	A critical mass analysis of community-based financing of water services in rural Kenya	2017
Bardosh, K.L.; Ryan, S.; Ebi, K.; Welburn, S.; Singer, B.	Addressing vulnerability, building resilience: Community-based adaptation to vector-borne diseases in the context of global change	2017
von Braun, J.	Agricultural change and health and nutrition in emerging economies	2017
Barcus, H.R.; Halfacree, K.	An introduction to population geographies: Lives across space	2017
Robb, K.; Null, C.; Teunis, P.; Yakubu, H.; Armah, G.; Moe, C.L.	Assessment of fecal exposure pathways in low-income urban neighborhoods in Accra, Ghana: rationale, design, methods, and key findings of the Sanipath study	2017
Wang, C.; Shi, G.; Wei, Y.; Western, A.W.; Zheng, H.; Zhao, Y.	Balancing rural household livelihood and regional ecological footprint in water source areas of the South-to-North Water Diversion Project	2017
Makabe, K.	Buying time: Environmental collapse and the future of energy	2017
Luh, J.; Bartram, J.K.	Challenges to Achieving the Sustainable Development Goals: Water Treatment	2017
Chaisse, J.	Charting the water regulatory future: Issues, challenges and directions	2017
Johnson, B.L.; Lichtveld, M.Y.	Environmental policy and public health, second edition	2017
Carrard, N.; Willetts, J.	Environmentally sustainable WASH? Current discourse, planetary boundaries and future directions	2017
Gottlieb, R.; Ng, S.	Global cities: Urban environments in Los Angeles, Hong Kong, and China	2017
Dorrian, J.; Thorsteinsson, E.; Di Benedetto, M.; Lane-Krebs, K.; Day, M.; Hutchinson, A.; Sherman, K.	HEALTH PSYCHOLOGY IN AUSTRALIA	2017
Ragin, D.F.	Health Psychology: An Interdisciplinary Approach, Third Edition	2017
Braithwaite, J.; Mannion, R.; Matsuyama, Y.; Shekelle, P.; Whittaker, S.; AL-Adawi, S.	Health systems improvement across the globe: Success stories from 60 countries	2017
Benebere, P.; Asante, F.; Appiah, D.	Hindrances to adaptation to water insecurity under climate variability in peri-urban Ghana	2017
Edington, J.	Indigenous environmental knowledge: Reappraisal	2017
McClafferty, H.	Integrative Pediatrics: Art, Science, and Clinical Application	2017
Motesharrei, S.; Rivas, J.; Kalnay, E.; Morgan, G.R.; Busalacchi, A.J.; Cahalan, R.F.; Cane, M.A.; Colwell, R.R.; Feng, K.; Franklin, R.S.; Hubacek, K.; Miralles-Wilhelm, F.; Miyoshi, T.; Ruth, M.; Sagdeev, R.; Shirmohammadi, A.; Shukla, J.; Srebric, J.; Yakovenko, V.M.; Zeng, N.	Modeling sustainability: Population, inequality, consumption, and bidirectional coupling of the Earth and human Systems	2017
Zingaro, D.; Portoghese, I.; Giannoccaro, G.	Modelling crop pattern changes and water resources exploitation: A case study	2017
Elliott, M.; MacDonald, M.C.; Chan, T.; Kearton, A.; Shields, K.F.; Bartram, J.K.; Hadwen, W.L.	Multiple Household Water Sources and Their Use in Remote Communities With Evidence From Pacific Island Countries	2017
Weimer, D.L.; Vining, A.R.	Policy analysis: Concepts and practice	2017
Bissonnette, L.; Bergeron, M.G.	Portable devices and mobile instruments for infectious diseases point-of-care testing	2017
Jepson, W.E.; Wutich, A.; Colllins, S.M.; Boateng, G.O.; Young, S.L.	Progress in household water insecurity metrics: a cross-disciplinary approach	2017
Coulacoglou, C.; Saklofske, D.H.	Psychometrics and psychological assessment: Principles and applications	2017
Chan, E.Y.Y.	Public health humanitarian responses to natural disasters	2017
Hutter, B.M.	Risk, resilience, inequality and environmental law	2017
Barnett, R.; Moon, G.; Pearce, J.; Thompson, L.; Twigg, L.	Smoking geographies: Space, place and tobacco	2017
Ayers, J.C.	Sustainability: An environmental science perspective	2017
Bangert, M.; Molyneux, D.H.; Lindsay, S.W.; Fitzpatrick, C.; Engels, D.	The cross-cutting contribution of the end of neglected tropical diseases to the sustainable development goals	2017
Nastiti, A.; Sudradjat, A.; Geerling, G.W.; Smits, A.J.M.; Roosmini, D.; Muntalif, B.S.	The effect of physical accessibility and service level of water supply on economic accessibility: a case study of Bandung City, Indonesia	2017
Mihelcic, J.R.; Naughton, C.C.; Verbyla, M.E.; Zhang, Q.; Schweitzer, R.W.; Oakley, S.M.; Wells, E.C.; Whiteford, L.M.	The Grandest Challenge of All: The Role of Environmental Engineering to Achieve Sustainability in the World's Developing Regions	2017
Brears, R.C.	The green economy and the water-energy-food nexus	2017
Eggimann, S.; Mutzner, L.; Wani, O.; Schneider, M.Y.; Spuhler, D.; Moy de Vitry, M.; Beutler, P.; Maurer, M.	The Potential of Knowing More: A Review of Data-Driven Urban Water Management	2017
Cook, H.F.	The Protection and Conservation of Water Resources	2017
Feldman, D.L.	The water-sustainable city: Science, policy and practice	2017
Richardson, B.J.	Time and Environmental Law: Telling Nature's Time	2017
Temmerman, F.	Trade in water under international law: Bulk fresh water, irrigation subsidies and virtual water	2017
Shepherd, D.A.; Patzelt, H.	Trailblazing in entrepreneurship: Creating new paths for understanding the field	2017
Lapworth, D.J.; Nkhuwa, D.C.W.; Okotto-Okotto, J.; Pedley, S.; Stuart, M.E.; Tijani, M.N.; Wright, J.A.	Urban groundwater quality in sub-Saharan Africa: current status and implications for water security and public health; Qualité des eaux souterraines urbaines en Afrique sub-saharienne: état actuel et implications pour la sécurité de l’approvisionnement en eau et la santé publique; Qualidade das águas subterrâneas urbanas na África subsaariana: panorama atual e implicações para segurança hídrica e…	2017
P. M. Natarajan, Shambhu Kalloikar	Urban resilient integrated water management pathways, to achieve sustainable water resources development in Chennai metropolitan city, Tamil Nadu, India	2017
Brears, R.C.	Urban Water Security	2017
Bell, S.	Urban water sustainability: Constructing infrastructure for cities and nature	2017
Muniruzzaman, I.K.; Mirza, S.; Islam, K.; Koli, K.	Viewpoint - Taking a multidimensional approach to small town water supply: The case of Paikgachha	2017
Wichelns, D.	Volumetric water footprints, applied in a global context, do not provide insight regarding water scarcity or water quality degradation	2017
Lane, A.; Norton, M.; Ryan, S.	Water Resources: A New Water Architecture	2017
Sorensen, J.P.R.; Sadhu, A.; Sampath, G.; Sugden, S.; Duttagupta, S.; Lapworth, D.J.; Marchant, B.P.; Pedley, S.	Are sanitation interventions a threat to drinking water supplies in rural India? An application of tryptophan-like fluorescence	2016
Wutich, A.; Beresford, M.; Carvajal, C.	Can Informal Water Vendors Deliver on the Promise of A Human Right to Water? Results From Cochabamba, Bolivia	2016
Sango, I.	Challenges and opportunities in addressing the environment- economic growth conflict in urban development: A focus on addis Ababa, Ethiopia	2016
Ansell, N.	Children, Youth and Development, Second Edition	2016
Fox, S.; Goodfellow, T.	Cities and development: Second edition	2016
Sauer, T.; Elsen, S.; Garzillo, C.	Cities in transition: Social innovation for Europe's urban sustainability	2016
Howard, G.; Calow, R.; MacDonald, A.M.; Bartram, J.K.	Climate Change and Water and Sanitation: Likely Impacts and Emerging Trends for Action	2016
Srinivasa Rao, C.; Jain, K.A.; Prasad, J.V.N.S.; Prasannakumar; Singh, A.K.	Climate Resilient Villages for Sustainable Food Security in Tropical India: Concept, Process, Technologies, Institutions, and Impacts	2016
Wolfgang Kron; Sabine Schlüter-Mayr; Markus Steuer	Drought aspects – fostering resilience through insurance	2016
Frederik Pischke, Robert Stefanski	Drought management policies – from global collaboration to national action	2016
Perez-Verdin, G.; Sanjurjo-Rivera, E.; Galicia, L.; Hernández-Díaz, J.C.; Hernández-Trejo, V.; Márquez-Linares, M.A.	Economic valuation of ecosystem services in Mexico: Current status and trends	2016
Larsen, T.A.; Hoffmann, S.; Lüthi, C.; Truffer, B.; Maurer, M.	Emerging solutions to the water challenges of an urbanizing world	2016
Eyles, J.; Baxter, J.	Environments, risks and health: Social perspectives	2016
Sojobi, A.O.	Evaluation of groundwater quality in a rural community in North Central of Nigeria	2016
Stakhiv, E.Z.; Werick, W.; Brumbaugh, R.W.	Evolution of drought management policies and practices in the United States	2016
de Araujo Barbosa, C.C.; Dearing, J.; Szabo, S.; Hossain, M.S.; Binh, N.T.; Nhan, D.K.; Matthews, Z.	Evolutionary social and biogeophysical changes in the Amazon, Ganges–Brahmaputra–Meghna and Mekong deltas	2016
B. Braga, J. Kelman	Facing the challenge of extreme climate: the case of Metropolitan São Paulo	2016
Fabiansson, C.; Fabiansson, S.	Food and the Risk Society: The power of risk perception	2016
Rogers, A.T.	Human behavior in the social environment: Perspectives on development and the life course, Fourth edition	2016
Rogers, A.T.	Human behavior in the social environment: Perspectives on development, the life course, and macro contexts	2016
Goodman, M.; Elliott, A.; Gitari, S.; Keiser, P.H.; Raimer-Goodman, L.A.	Improved water and household water purification practices among orphans and vulnerable children in a multi-sectoral empowerment program in Eastern province, Kenya	2016
Barrington, D.J.; Sridharan, S.; Saunders, S.G.; Souter, R.T.; Bartram, J.K.; Shields, K.F.; Meo, S.; Kearton, A.; Hughes, R.K.	Improving community health through marketing exchanges: A participatory action research study on water, sanitation, and hygiene in three Melanesian countries	2016
Schowalter, T.D.	Insect Ecology: An Ecosystem Approach: Fourth Edition	2016
Brunsma, D.L.; Iyall Smith, K.E.; Gran, B.K.	Institutions unbound: Social worlds and human rights	2016
Brunsma, D.L.; Smith, K.E.I.; Gran, B.K.	MOVEMENTS FOR HUMAN RIGHTS: LOCALLY AND GLOBALLY	2016
Gadsden, V.L.; Ford, M.; Breiner, H.	Parenting matters: Supporting parents of children ages 0-8	2016
	Pathways to urban sustainability: Challenges and opportunities for the United States	2016
Bonn, A.; Allott, T.; Evans, M.; Joosten, H.; Stoneman, R.	Peatland restoration and ecosystem services: Science, policy and practice	2016
Heesterman, A.R.G.; Heesterman, W.H.	Rediscovering sustainability: Economics of the finite earth	2016
Fang, Y.-P.; Zhao, C.; Rasul, G.; Wahid, S.M.	Rural household vulnerability and strategies for improvement: An empirical analysis based on time series	2016
Dominguez, I.; Torres, W.; Restrepo-Tarquino, I.; Paterson, C.; Gowing, J.	Self-supply as an alternative approach to water access in rural scattered regions: Evidence from a rural microcatchment in Colombia; Auto-abastecimiento como un enfoque alternativo para el acceso al agua en regiones rurales dispersas: Evidencia en una microcuenca rural en Colombia	2016
Horsfall, D.; Hudson, J.	Social policy in an era of global competition: From global to local perspectives	2016
Ozdenerol, E.	Spatial health inequalities: Adapting GIS tools and data analysis	2016
Gibson, M.	The feeding of nations: Redefining food security for the 21st century	2016
Carolan, M.	The sociology of food and agriculture: Second edition	2016
Tutu, R.A.; Stoler, J.	Urban but off the grid: the struggle for water in two urban slums in greater Accra, Ghana	2016
Pond, K.; Pedley, S.	Water and environmental health	2016
Cumming, O.; Watson, L.; Dangour, A.	Water, sanitation and hygiene a missing link to food and nutrition security?	2016
Seymour, F.; Busch, J.	Why Forests? Why Now?: The Science, Economics, and Politics of Tropical Forests and Climate Change	2016
Nesheim, M.C.; Oria, M.; Yih, P.T.	A framework for assessing effects of the food system	2015
Niang-Diop, I.; Ruppel, O.C.; Abdrabo, M.A.; Essel, A.; Lennard, C.; Padgham, J.; Urquhart, P.	Africa	2015
Rohde, M.M.; Edmunds, W.M.; Sharma, S.	An accessible hydrogeological tool to monitor critical groundwater resources in hard-rock aquifers	2015
Hijioka, Y.; Lin, E.; Pereira, J.J.; Corlett, R.T.; Cui, X.; Insarov, G.; Lasco, R.; Lindgren, E.; Surjan, A.	Asia	2015
Mason, L.R.	Beyond Improved Access: Seasonal and Multidimensional Water Security in Urban Philippines	2015
Rothman, D.S.; Irfan, M.T.; Margolese-Malin, E.; Hughes, B.B.; Moyer, J.D.	Building global infrastructure: Forecasting the next 50 years	2015
Li, E.; Endter-Wada, J.; Li, S.	Characterizing and Contextualizing the Water Challenges of Megacities	2015
Lam, W.W.-L.	Chinese politics in the era of Xi Jinping: Renaissance, reform, or retrogression?	2015
Chant, S.; McIlwaine, C.	Cities, slums and gender in the Global South: Towards a feminised urban future	2015
Reddy, P.P.	Climate resilient agriculture for ensuring food security	2015
Hotz, C.; Pelto, G.; Armar-Klemesu, M.; Ferguson, E.F.; Chege, P.; Musinguzi, E.	Constraints and opportunities for implementing nutrition-specific, agricultural and market-based approaches to improve nutrient intake adequacy among infants and young children in two regions of rural Kenya	2015
	Critical role of animal science research in food security and sustainability	2015
Oppenheimer, M.; Campos, M.; Warren, R.; Birkmann, J.; Luber, G.; O'Neill, B.; Takahashi, K.; Brklacich, M.; Semenov, S.; Licker, R.; Hsiang, S.	Emergent risks and key vulnerabilities	2015
Gunda, T.; Benneyworth, L.; Burchfield, E.	Exploring water indices and associated parameters: A case study approach	2015
Parham, S.	Food and Urbanism: The Convivial City and a Sustainable Future	2015
Anand, S.S.; Hawkes, C.; de Souza, R.J.; Mente, A.; Dehghan, M.; Nugent, R.; Zulyniak, M.A.; Weis, T.; Bernstein, A.M.; Krauss, R.M.; Kromhout, D.; Jenkins, D.J.A.; Malik, V.; Martínez-González, M.A.; Mozaffarian, D.; Yusuf, S.; Willett, W.C.; Popkin, B.M.	Food Consumption and its Impact on Cardiovascular Disease: Importance of Solutions Focused on the Globalized Food System A Report from the Workshop Convened by the World Heart Federation	2015
Obenchain, J.; Spark, A.	Food Policy: Looking Forward from the Past	2015
Cohen, M.; Garrett, J.L.	Food price volatility and urban food insecurity	2015
Leach, M.	Gender equality and sustainable development	2015
Fresco, L.O.; Waters, L.	HAMBURGERS IN Paradise: The Stories Behind the Food We Eat	2015
Udmale, P.D.; Ichikawa, Y.; Manandhar, S.; Ishidaira, H.; Kiem, A.S.; Shaowei, N.; Panda, S.N.	How did the 2012 drought affect rural livelihoods in vulnerable areas? Empirical evidence from India	2015
Dora, C.; Haines, A.; Balbus, J.; Fletcher, E.; Adair-Rohani, H.; Alabaster, G.; Hossain, R.; de Oniś, M.; Branca, F.; Neira, M.	Indicators linking health and sustainability in the post-2015 development agenda	2015
Jacob, D.E.; Nеlson, I.U.; Izah, S.C.	Indigenous Water Management Strategies in the Global South	2015
Crush, J.; Skinner, C.; Chikanda, A.	Informal migrant entrepreneurship and inclusive growth in South Africa, Zimbabwe and Mozambique	2015
Hale, M.; Raymond, G.; Wright, C.	List of publications on the economic and social history of Great Britain and Ireland published in 2014	2015
Romero-Lankao, P.; Smith, J.B.; Davidson, D.J.; Diffenbaugh, N.S.; Kinney, P.L.; Kirshen, P.; Kovacs, P.; Ruíz, L.V.	North America	2015
Ogwu, M.C.; Kosoe, E.A.	Place of Cultural Diversity in Sustainable Water Resource Management in Ghana	2015
Scott, B.A.; Amel, E.L.; Koger, S.M.; Manning, C.M.	Psychology for sustainability: 4th edition	2015
Ray, P.A.; Yang, Y.-C.E.; Wi, S.; Khalil, A.; Chatikavanij, V.; Brown, C.	Room for improvement: Hydroclimatic challenges to poverty-reducing development of the Brahmaputra River basin	2015
Van Assche, K.; Hornidge, A.-K.	Rural development: Knowledge & expertise in governance	2015
Szirmai, A.	Socio-Economic Development	2015
Brunsma, D.L.; Iyall Smith, K.E.; Gran, B.K.	The handbook of sociology and human rights	2015
Ammer, K.	Thermology 2014 - A computer-assisted literature survey	2015
Davies, T.C.	Urban geology of African megacities	2015
Gillespie, A.	Waste policy: International regulation, comparative and contextual perspectives	2015
Karthe, D.; Chalov, S.; Borchardt, D.	Water resources and their management in central Asia in the early twenty first century: status, challenges and future prospects	2015
Carley, S.; Lawrence, S.	Energy-based economic development: How clean energy can drive development and stimulate economic growth	2014
Johannessen, A.; Rosemarin, A.; Thomalla, F.; Gerger Swartling, T.; Axel Stenström, T.; Vulturius, G.	Strategies for building resilience to hazards in water, sanitation and hygiene (WASH) systems: The role of public private partnerships	2014
Asthana, V.; Shukla, A.C.	Water security in India: Hope, despair, and the challenges of human development	2014
Patz, J.A.; Frumkin, H.; Holloway, T.; Vimont, D.J.; Haines, A.	Climate change: Challenges and opportunities for global health	2014
Garrick, D.E.; Hall, J.W.	Water security and society: Risks, metrics, and pathways	2014
Christenson, E.; Bain, R.E.S.; Wright, J.A.; Aondoakaa, S.; Hossain, R.; Bartram, J.K.	Examining the influence of urban definition when assessing relative safety of drinking-water in Nigeria	2014
Ambert, A.-M.	The Web of poverty: Psychosocial perspectives	2014
Ghosh, N.; Goswami, A.	Sustainability Science for Social, Economic, and Environmental Development	2014
Doyle, S.	Before HIV: Sexuality, Fertility and Mortality in East Africa, 1900-1980	2014
Yadav, V.	Metropolitan governance: Cases of Ahmedabad and Hyderabad	2014
Cypher, J.M.	The process of economic development, Fourth edition	2014
Smith, E.R.; Mackie, D.M.; Claypool, H.M.	Social psychology: Fourth edition	2014
Carrabine, E.; Cox, P.; Fussey, P.; Hobbs, D.; South, N.; Thiel, D.; Turton, J.	Criminology: A sociological introduction	2014
Sugden, F.; de Silva, S.; Clement, F.; Maskey-Amatya, N.; Ramesh, V.; Philip, A.; Bharati, L.	A framework to understand gender and structural vulnerability to climate change in the Ganges River Basin: Lessons from Bangladesh, India and Nepal	2014
Willaarts, B.A.; Garrido, A.; Llamas, M.R.	Water for food security and well-being in Latin America and the Caribbean: Social and environmental implications for a globalized economy	2014
Newton, A.C.; Cantarello, E.	An introduction to the green economy: Science, systems and sustainability	2014
Ville, S.; Withers, G.	The Cambridge economic history of Australia	2014
Rockström, J.; Falkenmark, M.; Folke, C.; Lannerstad, M.; Barron, J.; Enfors-Kautsky, E.; Gordon, L.; Heinke, J.; Hoff, H.; Pahl-Wostl, C.	Water resilience for human prosperity	2014
Satterthwaite, D.; Hart, R.; Levy, C.; Mitlin, D.; Ross, D.; Smit, J.; Stephens, C.	The environment for children: Understanding and acting on the environmental hazards that threaten children and their parents	2014
Basu, N.B.; Van Meter, K.	Sustainability of Groundwater Resources	2014
Marcotullio, P.; Cooper, R.; Lebel, L.	Climate and Urbanization	2014
Wutich, A.; Brewis, A.	Food, water, and scarcity: Toward a broader anthropology of resource insecurity	2014
Ray, C.; Jain, R.	Low Cost Emergency Water Purification Technologies: Integrated Water Security Series	2014
Perrings, C.	Environment and development economics 20 years on	2014
Herrick, C.	Alcohol control and urban livelihoods in developing countries: Can public health aspirations and development goals be reconciled?	2014
Vieira, A.S.; Beal, C.D.; Ghisi, E.; Stewart, R.A.	Energy intensity of rainwater harvesting systems: A review	2014
Maxon, R.M.; Ofcansky, T.P.	Historical Dictionary of Kenya, Third Edition	2014
Turnunova, Z.	Women’s Lives and Livelihoods in Post-Soviet Uzbekistan: Ceremonies of Empowerment and Peacebuilding	2014
Mitchell, B.	Resource and environmental management	2013
Smith, A.	The climate bonus: Co-benefits of climate policy	2013
Ackerman, F.; Stanton, E.A.	Climate economics: The state of the art	2013
Keding, G.B.; Schneider, K.; Jordan, I.	Production and processing of foods as core aspects of nutrition-sensitive agriculture and sustainable diets	2013
Ioris, A.A.R.	The Adaptive Nature of the Neoliberal State and the State-led Neoliberalisation of Nature: Unpacking the Political Economy of Water in Lima, Peru	2013
Hood, L.	Leddy & Pepper's conceptual bases of professional nursing: Eighth edition	2013
Biehl, J.; Petryna, A.	When people come first: Critical studies in global health	2013
Biehl, J.; Petryna, A.	When people come first: Critical studies in global health	2013
	UN millennium development library: Taking action: Achieving gender equality and empowering women	2013
Connell, J.	Islands at risk?: Environments, economies and contemporary change	2013
Woolf, S.H.; Aron, L.	U.S. Health in International Perspective: Shorter Lives, Poorer Health	2013
Smil, V.	Should We Eat Meat?: Evolution and Consequences of Modern Carnivory	2013
Baer, H.A.; Merrill, S.; Ida, S.	Medical Anthropology and the World System: Critical Perspectives, Third Edition	2013
Basu, N.B.; Van Meter, K.	4.3 Sustainability of Groundwater Resources	2013
Obeng-Odoom, F.	Governance for pro-poor urban development: Lessons from Ghana	2013
Cullingworth, B.; Caves, R.W.	Planning in the USA: Policies, issues, and processes: Fourth edition	2013
Gómez-Baggethun, E.; Gren, Å.; Barton, D.N.; Langemeyer, J.; McPhearson, T.; O'Farrell, P.; Andersson, E.; Hamstead, Z.; Kremer, P.	Urban ecosystem services	2013
Few, R.; Matthies, F.	Flood hazards and health: Responding to present and future risks	2013
Obeng-Odoom, F.	Governance for pro-poor urban development: Lessons from Ghana	2013
Birley, M.	Health impact assessment: Principles and practice	2013
Satterthwaite, D.; Mitlin, D.	Reducing urban poverty in the global South	2013
Wang, A.L.	The search for sustainable legitimacy: Environmental law and bureaucracy in china	2013
Wheeler, T.; von Braun, J.	Climate change impacts on global food security	2013
Goss, P.E.; Lee, B.L.; Badovinac-Črnjević, T.; Strasser-Weippl, K.; Chávarri-Guerra, Y.; Louis, J.S.; Villarreal-Garza, C.; Unger-Saldaña, K.; Ferreyra, M.; Debiasi, M.; Liedke, P.E.R.; Touya, D.; Werutsky, G.; Higgins, M.; Fan, L.; Vasconcelos, C.; Cazap, E.; Vallejos S, C.; Mohar-Betancourt, A.; Knaul, F.; Arreola-Ornelas, H.; Batura, R.; Luciani, S.; Sullivan, R.; Finkelstein, D.; Simon, S.; B…	Planning cancer control in Latin America and the Caribbean	2013
Oloukoi, G.; Bob, B.; Vadi, M.	Households' coping strategies for climate variability related water shortages in Oke-Ogun region, Nigeria	2013
Shinn, D.H.; Ofcansky, T.P.	Historical Dictionary of Ethiopia, Second Edition	2013
	Himalayan glaciers: Climate change, water resources, and water security	2012
Deffuant, G.; Alvarez, I.; Barreteau, O.; de Vries, B.; Edmonds, B.; Gilbert, N.; Gotts, N.; Jabot, F.; Janssen, S.; Hilden, M.; Kolditz, O.; Murray-Rust, D.; Rougé, C.; Smits, P.	Data and models for exploring sustainability of human well-being in global environmental change	2012
Williams, J.; Hill, P.	A Handbook for the Assessment of Children's Behaviours	2012
Ahmed, N.; Muir, J.F.; Garnett, S.T.	Bangladesh needs a "blue-green revolution" to achieve a green economy	2012
Dudley, N.	Authenticity in nature: Making choices about the naturalness of ecosystems	2012
Handmer, J.; Honda, Y.; Kundzewicz, Z.W.; Arnell, N.; Benito, G.; Hatfield, J.; Mohamed, I.F.; Peduzzi, P.; Wu, S.; Sherstyukov, B.; Takahashi, K.; Yan, Z.; Vicuña, S.; Suarez, A.; Abdulla, A.; Bouwer, L.M.; Campbell, J.; Hashizume, M.; Hattermann, F.; Heilmayr, R.; Keating, A.; Ladds, M.; Mach, K.J.; Mastrandrea, M.D.; Mechler, R.; Nobre, C.; Sanghi, A.; Screen, J.; Smith, J.; Velegrakis, A.; Ve…	Changes in impacts of climate extremes: Human systems and ecosystems	2012
Deb, D.	Beyond developmentality: Constructing inclusive freedom and sustainability	2012
Binns, T.; Dixon, A.; Nel, E.	Africa: Diversity and development	2012
Mitlin, D.	Urban poverty in the global south: Scale and nature	2012
Mason, L.R.	Gender and asset dimensions of seasonal water insecurity in Urban Philippines	2012
Rydin, Y.; Bleahu, A.; Davies, M.; Davila, J.D.; Friel, S.; de Grandis, G.; Groce, N.; Hallal, P.C.; Hamilton, I.; Chapman, P.; Lai, K.-M.; Lim, C.J.; Martins, J.; Osrin, D.; Ridley, I.; Scott, I.; Taylor, M.; Wilkinson, P.; Wilson, J.	Shaping cities for health: Complexity and the planning of urban environments in the 21st century	2012
Ashford, N.A.; Hall, R.P.	Technology, globalization, and sustainable development: Transforming the industrial state	2011
Peltzer, K.; Pengpid, S.	Health behavior interventions in developing countries	2011
Rothman, K.J.; Greenland, S.; Lash, T.L.	Modern epidemiology: Third edition	2011
Buenemann, M.; Martius, C.; Jones, J.W.; Herrmann, S.M.; Klein, D.; Mulligan, M.; Reed, M.S.; Winslow, M.; Washington-Allen, R.A.; Lal, R.; Ojima, D.	Integrative geospatial approaches for the comprehensive monitoring and assessment of land management sustainability: Rationale, Potentials, and Characteristics	2011
Myers, G.	AFRICAN CITIES: Alternative visions of urban theory and practice	2011
	Small arms survey 2013: Everyday dangers	2011
Wolf, J.B.	Is breast best?: Taking on the breastfeeding experts and the new high stakes of motherhood	2011
	Adapting to the impacts of climate change	2010
Shackleton, C.M.; Shackleton, S.E.; Gambiza, J.; Nel, E.; Rowntree, K.; Urquhart, P.; Fabricius, C.; Ainslie, A.	Livelihoods and vulnerability in the arid and semi-arid lands of Southern Africa	2010
Blanco-Canqui, H.; Lal, R.	Principles of soil conservation and management	2010
Howard, G.; Katrina, C.; Pond, K.; Brookshaw, A.; Hossain, H.; Bartram, J.	Securing 2020 vision for 2030: Climate change and ensuring resilience in water and sanitation services	2010
Agnew, C.; Woodhouse, P.	Water resources and development	2010
Füssel, H.-M.	How inequitable is the global distribution of responsibility, capability, and vulnerability to climate change: A comprehensive indicator-based assessment	2010
Smith, M.H.; Hargroves, K.; Desha, C.	Cents and sustainability: Securing our common future by decoupling economic growth from environmental pressures	2010
Salih, M.M.	Climate change and sustainable development: New challenges for poverty reduction	2009
Hanley, N.; Barbier, E.B.	Pricing nature: Cost-Benefit analysis and environmental policy	2009
Leon, D.; Walt, G.	Poverty, Inequality, and Health: An International Perspective	2009
Toulmin, C.	Climate change in Africa	2009
Munasinghe, M.	Sustainable development in practice: Sustainomics methodology and applications	2009
Costello, A.; Abbas, M.; Allen, A.; Ball, S.; Bell, S.; Bellamy, R.; Friel, S.; Groce, N.; Johnson, A.; Kett, M.; Lee, M.; Levy, C.; Maslin, M.; McCoy, D.; McGuire, B.; Montgomery, H.; Napier, D.; Pagel, C.; Patel, J.; de Oliveira, J.A.P.; Redclift, N.; Rees, H.; Rogger, D.; Scott, J.; Stephenson, J.; Twigg, J.; Wolff, J.; Patterson, C.	Managing the health effects of climate change. Lancet and University College London Institute for Global Health Commission	2009
Quentin Grafton, R.Q.; Adamowicz, W.; Dupont, D.; Nelson, H.; Hill, R.J.; Renzetti, S.	The Economics of the Environment and Natural Resources	2008
Wankel, C.	21st century management: A reference handbook	2008
Davis, S.F.; Buskist, W.	21st century psychology: A reference handbook	2008
Turton, A.	A South African perspective on a possible benefit-sharing approach for transboundary waters in the SADC region	2008
Greenberg, M.	Environmental policy analysis and practice	2007
Bryant, C.D.; Peck, D.L.	21st century sociology: A reference handbook	2007
Löpez, R.; Toman, M.A.	Economic Development and Environmental Sustainability: New Policy Options	2006
Delgado, M.	Social Work with Latinos: A Cultural Assets Paradigm	2006
Lincoln, S.F.	Challenged Earth: An overview of humanity’s stewardship of Earth	2006
Asthana, S.; Halliday, J.	What works in tackling health inequalities?: Pathways, policies and practice through the lifecourse	2006
Marley, D.F.	Historic Cities of the Americas: An Illustrated Encyclopedia	2005

## Sheet: OTHER SOURCES
LITERATURE SOURCE: WSP Portal
Authors	Title	Year
Ministry of Water and Energy Ethiopia	Climate Resilient Water Safety Plan Implementation: Guidelines for Community Managed Rural Drinking Water Supplies	2015
Government of Nepal	Climate Resilient Water Safety Plans Guideline Climate Resilient Water Safety Plans Guideline: Rural Water Supply System Rural Water Supply System.	2017
World Health Organization	Climate-resilient water safety plans: managing health risks associated with climate variability and change.	2017
UNICEF Pacific	Pacific WASH Resilience Guidelines.	2018
R.M. McKeown	Water Safety Plan Template Including Climate Considerations for Rural Water Supplies: United Rep. of Tanzania	2018
WHO UNECE	A field guide to improving small drinking-water supplies: water safety planning for rural communities	2022
LITERATURE SOURCE: GREY LITERATURE
Authors	Title	Year
GWP-UNICEF	Local Participatory Water Supply and Climate Change Risk Assessment: Modified Water Safety Plans. New York, NY	2017
GWP-UNICEF	WASH Climate Resilient Development Risk assessments for WASH	2017
UNICEF Indonesia	Framework for Strengthening Water, Sanitation, & Hygiene (WASH) Climate Resilience	2024
LITERATURE SOURCE: OTHER BIBLIOGRAPHY
Authors	Title	Year
Government of Vanuatu	Vanuatu National Implementation Plan for Safe and Secure Community Drinking Water. A Guide to the Plan	2018
T. Kapwata	Applying a WASH risk assessment tool in a rural South African setting to identify risks and opportunities for climate resilient communities	2022
M.Love	Pacific Community Water Management – DWSSP Structured Follow-up Implementation Guide	2022
A. Nijhawan	How Tough is WASH Climate Resilience Framework A field guide to assess climate resilience of water supplies	2023
Daniel	Development and Piloting of a Rural Water Supply Climate Resilience Monitoring and Assessment Tool in Indonesia	2024
University of Sidney	Rural Water Supply Climate Resilience Monitoring and Assessment Tool in Indonesia	2024

## Sheet: FINAL REFERENCES
FINAL REFERENCES
Authors	Title	Year
Ministry of Water and Energy Ethiopia	Climate Resilient Water Safety Plan Implementation: Guidelines for Community Managed Rural Drinking Water Supplies	2015
G.String	A systematic review of outcomes and lessons learned from general, rural, and country-specific Water Safety Plan implementations	2016
WHO	Climate-resilient water safety plans: managing health risks associated with climate variability and change.	2017
GWP-UNICEF	Local Participatory Water Supply and Climate Change Risk Assessment: Modified Water Safety Plans. New York, NY	2017
Government of Nepal	Climate Resilient Water Safety Plans Guideline Climate Resilient Water Safety Plans Guideline: Rural Water Supply System Rural Water Supply System.	2017
	WASH Climate Resilient Development Risk assessments for WASH	2017
Government of Vanuatu	Vanuatu National Implementation Plan for Safe and Secure Community Drinking Water. A Guide to the Plan	2018
UNICEF Pacific	Pacific WASH Resilience Guidelines.	2018
R.M. McKeown	Water Safety Plan Template Including Climate Considerations for Rural Water Supplies: United Rep. of Tanzania	2018
B. Rickert	Including Aspects of Climate Change into Water Safety Planning: Literature Review of Global Experience and Case Studies from Ethiopian Urban Supplies.	2019
G.Howard	The how tough is WASH framework for assessing the climate resilience of water and sanitation	2021
A. Nijhawan	Assessing the Climate Resilience of Community-Managed Water Supplies in Ethiopia and Nepal	2022
T. Kapwata	Applying a WASH risk assessment tool in a rural South African setting to identify risks and opportunities for climate resilient communities	2022
E.C. Rand	Review of water safety planning processes and options for improved climate resilient infrastructure in Vanuatu	2022
WHO UNECE	A field guide to improving small drinking-water supplies: water safety planning for rural communities	2022
M.Love	Pacific Community Water Management – DWSSP Structured Follow-up Implementation Guide	2022
A. Nijhawan	How Tough is WASH Climate Resilience Framework A field guide to assess climate resilience of water supplies	2023
R.T. Souter	Strengthening rural community water safety planning in Pacific Island countries: evidence and lessons from Solomon Islands, Vanuatu, and Fiji	2024
Daniel	Development and Piloting of a Rural Water Supply Climate Resilience Monitoring and Assessment Tool in Indonesia	2024
University of Sidney	Rural Water Supply Climate Resilience Monitoring and Assessment Tool in Indonesia	2024
Ministry of National Development Planning Indonesia	Framework for Strengthening Resilience in Drinking Water, Sanitation, and Hygiene	2024

## Sheet: Search Flow Diagram
The flow diagram representing the results of literature search
